# Supplementary material for: Mechanistic investigation on N → Cα → O relay via non-Brook rearrangement: reaction conditions promote synthesis of furo[3,2-c]pyridinones
Source: Royal Society of Chemistry journal article supplement (doi:10.1039/c7ob02081c), 2017-01-01
Supplement: c7ob02081c1.pdf [file c7ob02081c1.pdf]

## Electronic Supplementary Information

### Mechanistic Investigation on $N \rightarrow C^{\alpha} \rightarrow O$ Relay via Non-Brook Rearrangement: Reaction Conditions Promote Synthesis of Furo[3,2- c]pyridinones

Lihan Zhu, Haiyan Yuan\*, Jingping Zhang\*

Faculty of Chemistry, Northeast Normal University, Changchun 130024, China

Fax: +86-431-85099521; Tel: +86-431-85099372

\*Corresponding author. E-mail: jpzhang@nenu.edu.cn; yuanhy034@nenu.edu.cn

#### Table of contents

|                  |                                                                                                                                                                                                                                                                                                                                                                                                                                                                                                                                                                                                                                         |     |
|------------------|-----------------------------------------------------------------------------------------------------------------------------------------------------------------------------------------------------------------------------------------------------------------------------------------------------------------------------------------------------------------------------------------------------------------------------------------------------------------------------------------------------------------------------------------------------------------------------------------------------------------------------------------|-----|
| <b>Fig. S1</b>   | DFT computed energy surfaces for $\text{Na}^+$ -assisted pathway PA1 (black line), $\text{H}_2\text{O}-\text{Na}^+$ co-assisted PA1W (purple line), $2\text{H}_2\text{O}-\text{Na}^+$ co-assisted PA2W (blue line), $3\text{H}_2\text{O}-\text{Na}^+$ (wine line) co-assisted PA3W', and $2\text{H}_2\text{O}-\text{DMSO}-\text{Na}^+$ (green line) co-assisted PA3W in the solvent phase, and free energies are given in kcal/mol.                                                                                                                                                                                                     | S-3 |
| <b>Fig. S2</b>   | DFT computed energy surfaces for the $\text{Na}^+$ -assisted pathway PA1 (black line), $2\text{H}_2\text{O}-\text{DMSO}-\text{Na}^+$ co-assisted PA3W (olive line), and $3\text{H}_2\text{O}-\text{Na}^+$ co-assisted PA3W' (wine line) in the solvent phase, and free energies are given in kcal/mol. And optimized geometry structures of stepwise transition states for $\text{Na}^+$ -assisted, $2\text{H}_2\text{O}-\text{DMSO}-\text{Na}^+$ , and $3\text{H}_2\text{O}-\text{Na}^+$ co-assisted pathways PA1 and PA3W in the DMSO phase, respectively. Distances are in angstrom. N: blue, C: gray, O: red, H: white, Na: purple. | S-4 |
| <b>Fig. S3</b>   | DFT computed energy surfaces for the $\text{Na}^+$ -DMSO- $2\text{H}_2\text{O}$ co-assisted path PA0 (red line). Activation free energies are given in kcal/mol.                                                                                                                                                                                                                                                                                                                                                                                                                                                                        | S-5 |
| <b>Fig. S4</b>   | The comparison of free energy profiles in $2\text{H}_2\text{O}-\text{DMSO}$ -assisted path PA3W at M06-2X/6-311+G(d,p) (blue line) and B3LYP-D3/6-311+G(d,p) (green line). Activation free energies are given in kcal/mol.                                                                                                                                                                                                                                                                                                                                                                                                              | S-5 |
| <b>Fig. S5</b>   | DFT computed energy surfaces for the $\text{Na}^+$ -DMSO co-assisted path PB1 (dark yellow) and $\text{Na}^+$ -3DMSO co-assisted path PB3 (dark cyan). Activation free energies are given in kcal/mol.                                                                                                                                                                                                                                                                                                                                                                                                                                  | S-6 |
| <b>Fig. S6</b>   | Secondary orbital interactions in HOMOs of <b>TS3d</b> and <b>TS5a</b> for the concerted ring-opening and recyclization transition state (green ellipse) process.                                                                                                                                                                                                                                                                                                                                                                                                                                                                       | S-6 |
| <b>Fig. S7</b>   | Non-covalent interactions analysis (blue, strong interaction; green, weak interaction; and red, strong repulsion) for concerted ring-opening and recyclization transition states <b>TS3d</b> and <b>TS5a</b> under $\text{Na}^+$ -assisted and $2\text{H}_2\text{O}-\text{DMSO}-\text{Na}^+$ co-assisted conditions.                                                                                                                                                                                                                                                                                                                    | S-7 |
| <b>Fig. S8</b>   | DFT computed energy surfaces for the $\text{Na}^+$ -assisted pathway PA3 (gray line) and $3\text{H}_2\text{O}-\text{Na}^+$ co-assisted path PA4 (dark gray line). Activation free energies are given in kcal/mol.                                                                                                                                                                                                                                                                                                                                                                                                                       | S-7 |
| <b>Table S1.</b> | Selected donor-acceptor bond orbital interaction and second-order                                                                                                                                                                                                                                                                                                                                                                                                                                                                                                                                                                       | S-8 |

|                  |                                                                                                                                                                                                                                                                                                                                      |                |
|------------------|--------------------------------------------------------------------------------------------------------------------------------------------------------------------------------------------------------------------------------------------------------------------------------------------------------------------------------------|----------------|
|                  | perturbation stabilization energies (E(2), kcal/mol) for transition state <b>TS5a''</b>                                                                                                                                                                                                                                              |                |
| <b>Table S2.</b> | DFT calculated free energy profiles of solvation effects and gas phase of TSs and intermediates in path PA3W                                                                                                                                                                                                                         | S-9            |
| <b>Table S3.</b> | DFT calculated $\Delta\Delta G^\ddagger$ values of solvation effects and gas phase of key TSs ( <b>TS5</b> , <b>TS5a</b> , <b>TS3d</b> , <b>TS5e</b> , <b>TS5a'</b> , and <b>TS3e'</b> ) and intermediates ( <b>Int5</b> , <b>Int5a</b> , <b>Int2</b> , <b>Int5e</b> , <b>Int5a'</b> , <b>Int2e</b> ) in the solvent phase           | S-9            |
| <b>Table S4.</b> | DFT calculated $\Delta\Delta G^\ddagger$ values of optimization and single point calculation of key TSs ( <b>TS5</b> , <b>TS5a</b> , <b>TS3d</b> , <b>TS5e</b> , <b>TS5a'</b> , and <b>TS3e'</b> ) and intermediates ( <b>Int5</b> , <b>Int5a</b> , <b>Int2</b> , <b>Int5e</b> , <b>Int5a'</b> , <b>Int2e</b> ) in the solvent phase | S-10           |
| <b>Table S5.</b> | NBO charges of selected atoms in key transition states in PA3W and PB0                                                                                                                                                                                                                                                               | S-10           |
| <b>Table S6.</b> | Properties of electron density at bond critical points for TSs obtained from AIM analysis, all quantities are in atomic unit.                                                                                                                                                                                                        | S-11           |
| <b>S1.</b>       | The B3LYP/6-31+G** optimized coordinates between benzaldehyde and 1-cinnamoylcyclopropanecarboxamides in gas phase.                                                                                                                                                                                                                  | S-11-S-<br>131 |

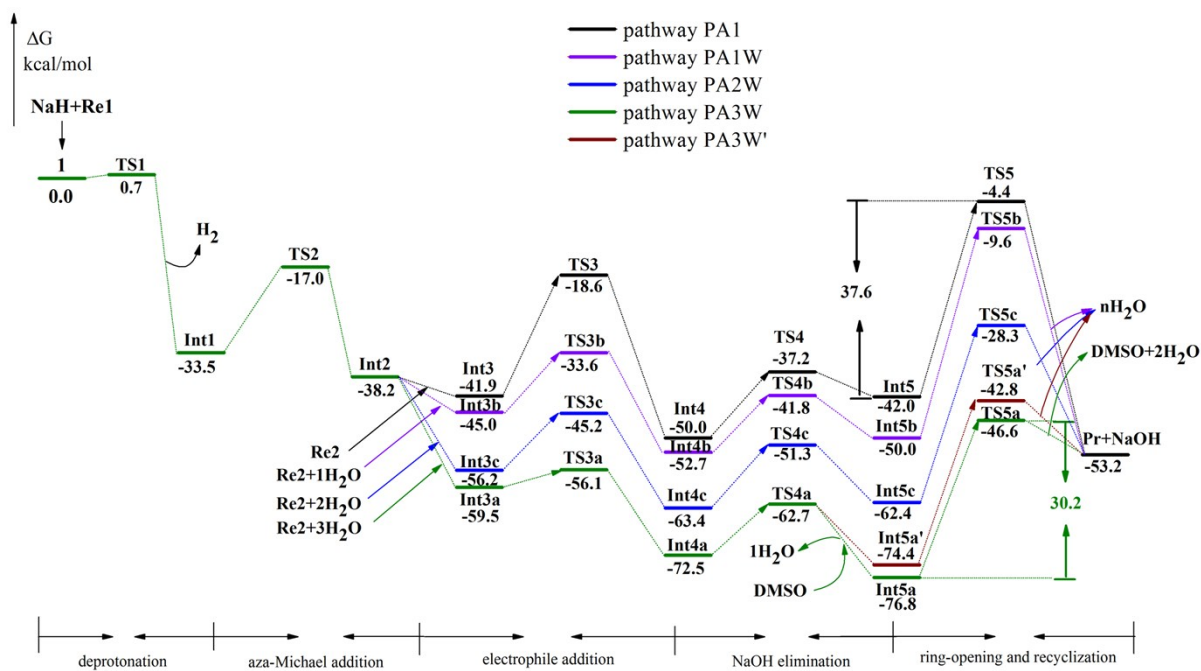

**Fig. S1** DFT computed energy surfaces for Na<sup>+</sup>-assisted pathway PA1 (black line), H<sub>2</sub>O-Na<sup>+</sup> co-assisted PA1W (purple line), 2H<sub>2</sub>O-Na<sup>+</sup> co-assisted PA2W (blue line), 3H<sub>2</sub>O-Na<sup>+</sup> (red line) co-assisted PA3W', and 2H<sub>2</sub>O-DMSO-Na<sup>+</sup> (green line) co-assisted PA3W in the solvent phase, and free energies are given in kcal/mol.

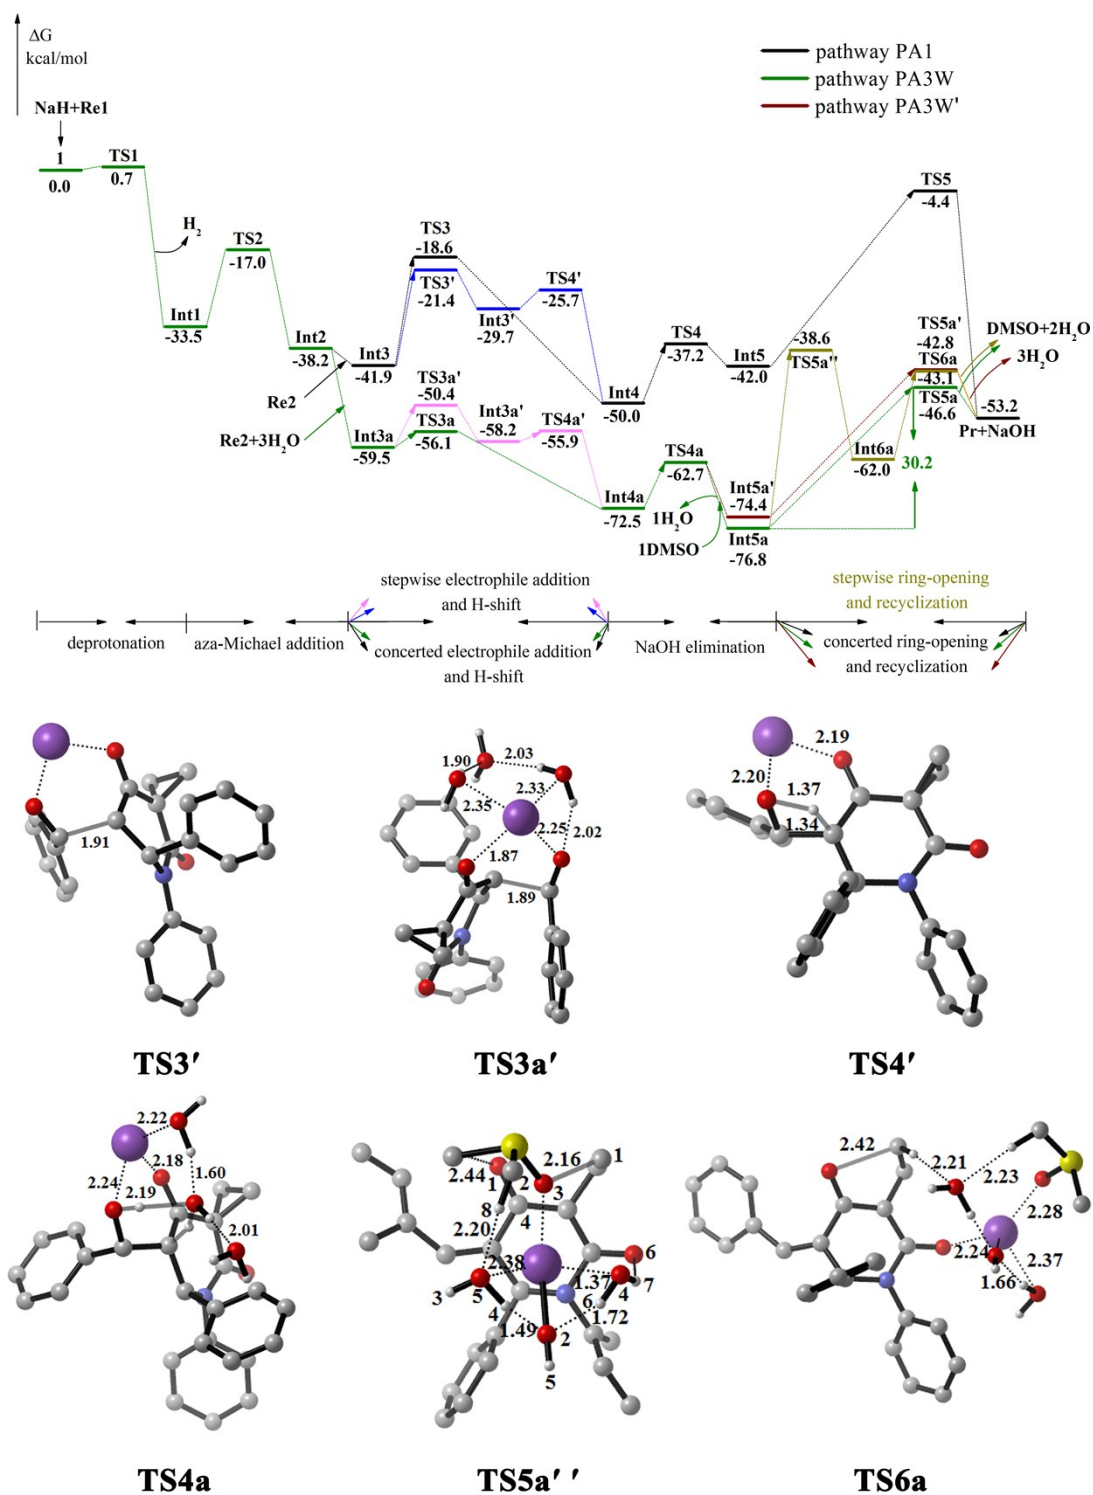

**Fig. S2** DFT computed energy surfaces for the Na<sup>+</sup>-assisted pathway PA1 (black line), 2H<sub>2</sub>O-DMSO-Na<sup>+</sup> co-assisted PA3W (olive line), and 3H<sub>2</sub>O-Na<sup>+</sup> co-assisted PA3W' (wine line) in the solvent phase, and free energies are given in kcal/mol. And optimized geometry structures of stepwise transition states for Na<sup>+</sup>-assisted, 2H<sub>2</sub>O-DMSO-Na<sup>+</sup>, and 3H<sub>2</sub>O-Na<sup>+</sup> co-assisted pathways PA1 and PA3W in the DMSO phase, respectively. Distances are in angstrom. N: blue, C: gray, O: red, H: white, Na: purple.

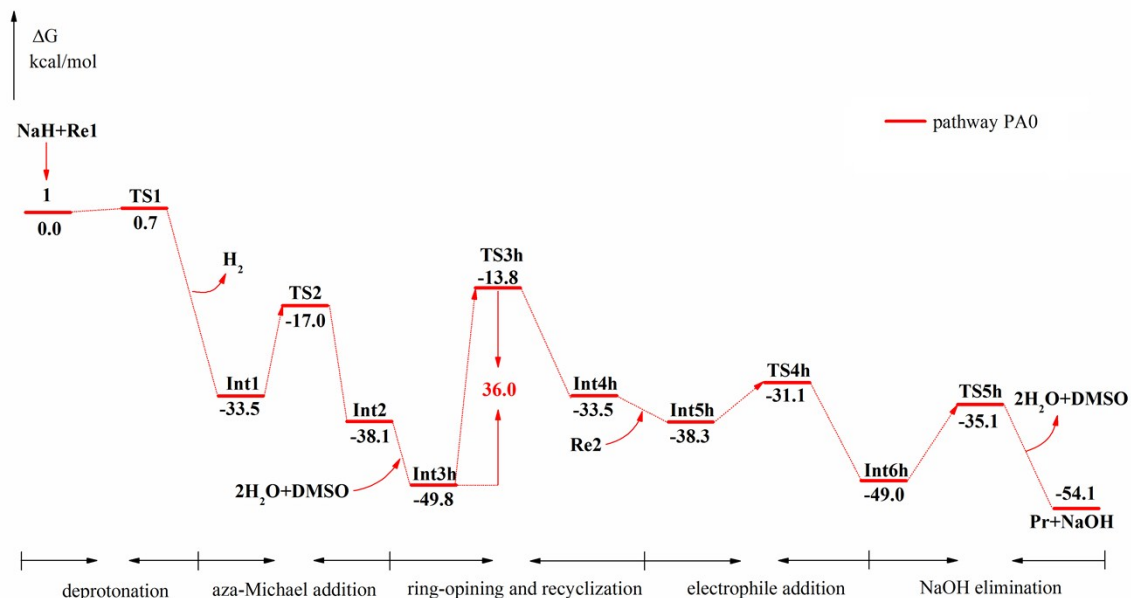

**Fig. S3** DFT computed energy surfaces for the Na<sup>+</sup>-DMSO-2H<sub>2</sub>O co-assisted path PA0 (red line). Activation free energies are given in kcal/mol.

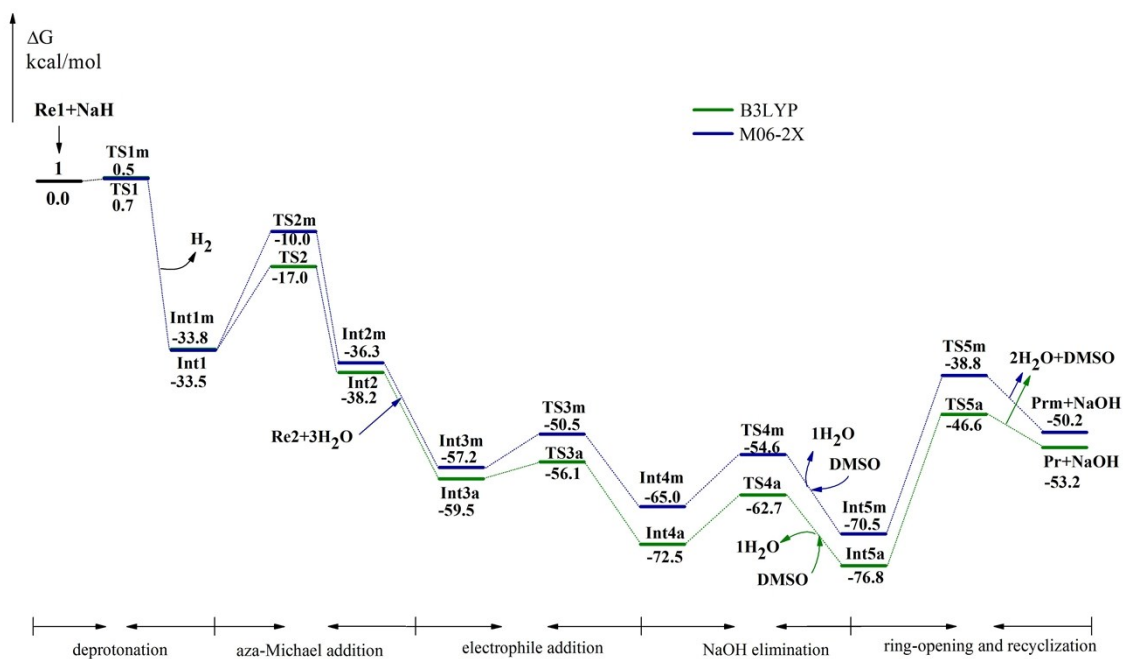

**Fig. S4** The comparison of free energy profiles in 2H<sub>2</sub>O-DMSO-assisted path PA3W at M06-2X/6-311+G(d,p) (blue line) and B3LYP-D3/6-311+G(d,p) (green line). Activation free energies are given in kcal/mol.

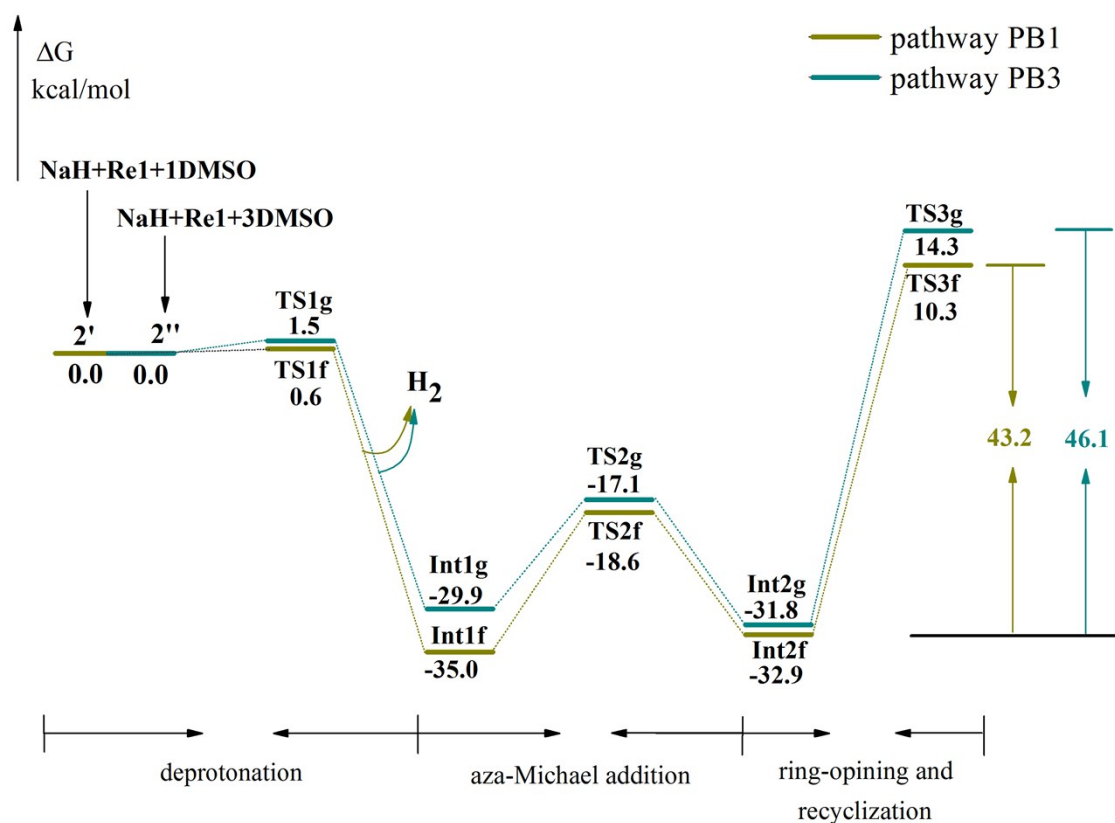

**Fig. S5** DFT computed energy surfaces for the  $\text{Na}^+$ -DMSO co-assisted path PB1 (dark yellow) and  $\text{Na}^+$ -3DMSO co-assisted path PB3 (dark cyan). Activation free energies are given in kcal/mol.

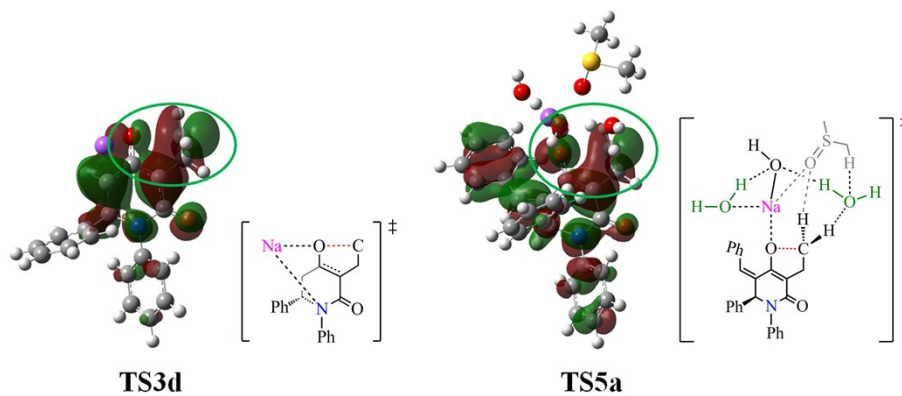

**Fig. S6** Secondary orbital interactions in HOMOs of **TS3d** and **TS5a** for the concerted ring-opening and recyclization transition state (green ellipse) process.

As illustrated in **Fig. S6**, the electron delocalization of the reaction sites and the whole molecular fragments in HOMO of **TS5a** are higher than that in **TS3d**. Therefore, the cooperation of electrostatic and HBs interactions effectively stabilize the structure of **TS5a** and reduce the energy barrier of the rate-determining step.

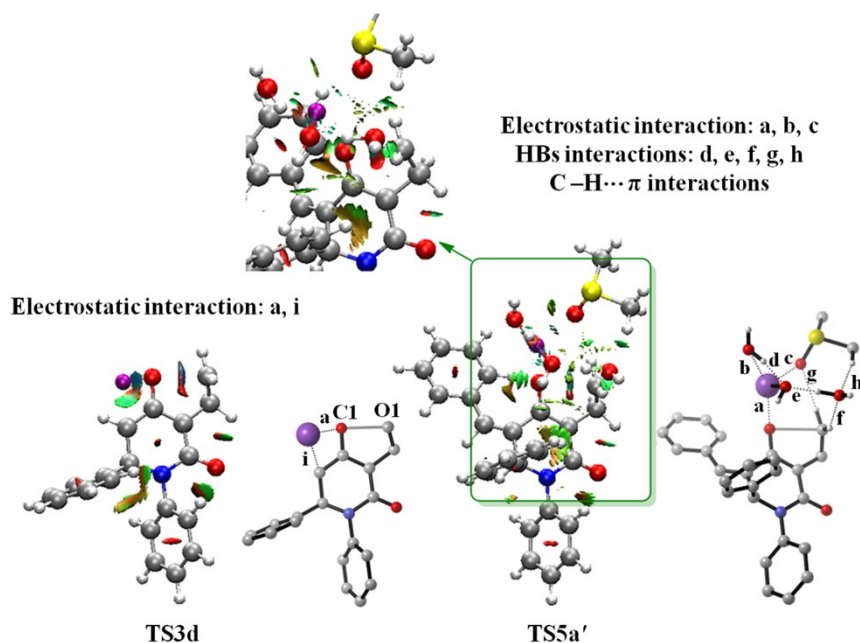

**Fig. S7** Non-covalent interactions analysis (blue, strong interaction; green, weak interaction; and red, strong repulsion) for concerted ring-opening and recyclization transition states **TS3d** and **TS5a** under  $\text{Na}^+$ -assisted and  $2\text{H}_2\text{O}$ -DMSO- $\text{Na}^+$  co-assisted conditions.

To unravel the non-covalent interactions of transition states **TS5a** and **TS3d**, we employed the Multiwfn<sup>17, 26</sup> and VMD<sup>18</sup> to conduct electron densities and reduced density gradient RDG<sup>27</sup> isosurface for the rate-determining step structures. As shown in Fig. S7, it is clear that both TSs have strong interactions between the reaction sites C1 and O1 represented by the deep blue color. Moreover, in **TS5a**, triple electrostatic interactions (a, b, and c) and five HBs interactions (d, e, g, h, and f) shown in green color further stabilize the **TS5a** structure as compared to  $\text{Na}^+\cdots\text{O}$  electrostatic interaction in transition state **TS3d**.

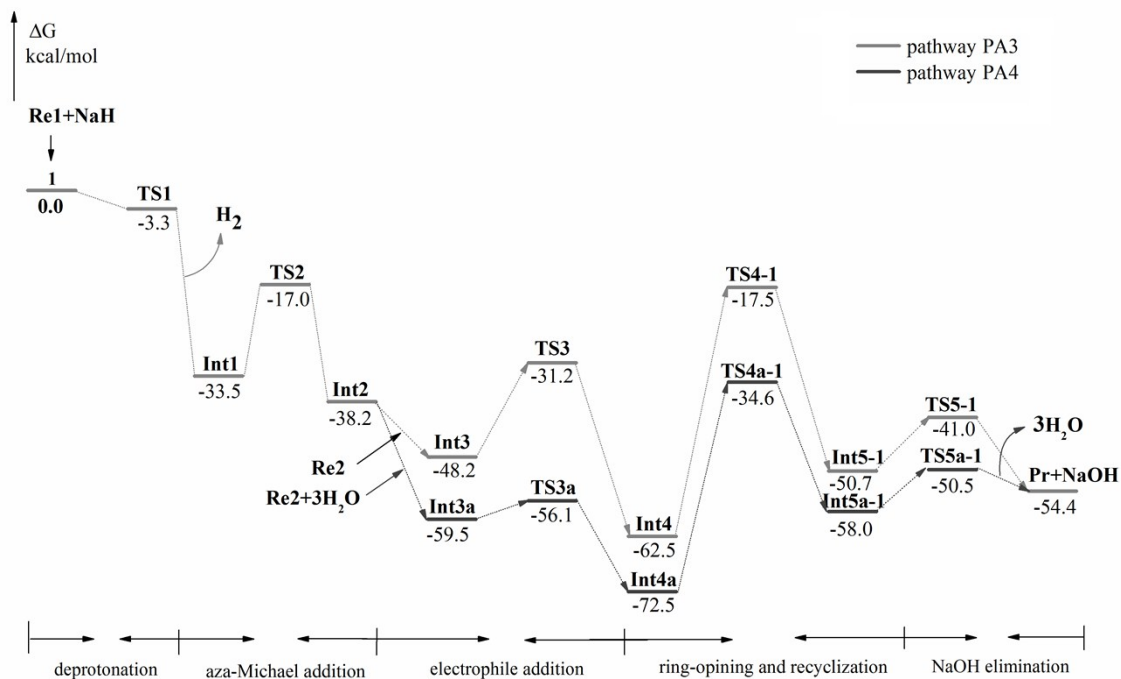

**Fig. S8** DFT computed energy surfaces for the  $\text{Na}^+$ -assisted pathway PA3 (gray line) and  $3\text{H}_2\text{O}$ - $\text{Na}^+$  co-assisted path PA4 (dark gray line). Activation free energies are given in kcal/mol.

Additionally, we also investigated the effect of the sequence of NaOH elimination and concerted ring-opening and recyclization processes on the energy profile (Figure S4). The computational results indicated that the high activation energy barriers of **TS4'** (45.01/-17.50 kcal/mol) and **TS4b'** (41.38/-22.06 kcal/mol) are kinetically inaccessible and can be excluded.

**Table S1.** Selected donor-acceptor bond orbital interaction and second-order perturbation stabilization energies (E(2), kcal/mol) for transition state **TS5a''**

| TSs         | donor         | acceptor  | interaction | E(2)  |
|-------------|---------------|-----------|-------------|-------|
| <b>TS5a</b> | LP O1         | LP* Na    | n→n*        | 15.4  |
|             | BD C4–O1      | LP* Na    | π→n*        | 3.33  |
|             | LP O3         | LP* Na    | n→n*        | 17.5  |
|             | LP O5         | LP* Na    | n→n*        | 13.16 |
|             | BD O5–H4      | LP* O2    | σ→n*        | 60.46 |
|             | BD O4–H6      | LP* O2    | σ→n*        | 86.01 |
|             | LP O3         | BD* C1–H1 | n→σ*        | 3.31  |
|             | LP O4         | BD* C1–H2 | n→σ*        | 4.94  |
|             | LP O4         | BD* C2–H8 | n→σ*        | 7.76  |
|             | <b>TS5a''</b> | LP O4     | LP* Na      | n→n*  |
| LP O3       |               | LP* Na    | n→n*        | 15.5  |
| LP O5       |               | LP* Na    | n→n*        | 10.16 |
| BD O5–H4    |               | LP* O2    | σ→n*        | 51.24 |
| BD O4–H6    |               | LP* O2    | σ→n*        | 22.45 |
| LP O5       |               | BD* C2–H8 | n→σ*        | 5.38  |
| BD O4–H7    |               | LP* O6    | σ→n*        | 42.31 |



**Table S2.** DFT calculated free energy profiles of solvation effects and gas phase of TSs and intermediates in path PA3W

| TSs          | gas phase | solvation effects | $\Delta G/\text{kcal/mol}$ |
|--------------|-----------|-------------------|----------------------------|
| <b>1</b>     | 0         | 0                 | 0                          |
| <b>TS1</b>   | 2.5       | 0.7               | 1.8                        |
| <b>Int1</b>  | -33.1     | -33.5             | 2.4                        |
| <b>TS2</b>   | 1.8       | -17.0             | 18.8                       |
| <b>Int2</b>  | -19.7     | -38.2             | 18.5                       |
| <b>Int3a</b> | -50.4     | -59.5             | 9.1                        |
| <b>TS3a</b>  | -39.7     | -56.1             | 16.4                       |
| <b>Int4a</b> | -48.9     | -72.5             | 23.6                       |
| <b>TS4a</b>  | -28.4     | -62.7             | 34.3                       |
| <b>Int5a</b> | -61.1     | -76.8             | 15.7                       |
| <b>TS5a</b>  | -25.7     | -46.6             | 21.6                       |
| <b>Pr</b>    | -34.2     | -53.2             | 19.0                       |

**Table S3.** DFT calculated  $\Delta\Delta G^\ddagger$  values of solvation effects and gas phase of key TSs (**TS5**, **TS5a**, **TS3d**, **TS5e**, **TS5a'**, and **TS3e'**) and intermediates (**Int5**, **Int5a**, **Int2**, **Int5e**, **Int5a'**, **Int2e**) in the solvent phase

| TSs          | solvation effects | gas phase | $\Delta\Delta G^\ddagger$ |
|--------------|-------------------|-----------|---------------------------|
| <b>TS5</b>   | 37.6              | 42.4      | 4.8                       |
| <b>TS5a</b>  | 30.2              | 35.4      | 5.2                       |
| <b>TS3d</b>  | 49.2              | 55.7      | 6.5                       |
| <b>TS5e</b>  | 35.9              | 40.7      | 4.8                       |
| <b>TS5a'</b> | 31.6              | 36.5      | 4.9                       |
| <b>TS3e'</b> | 36.2              | 40.9      | 4.7                       |

**Table S4.** DFT calculated  $\Delta\Delta G^\ddagger$  values of optimization and single point calculation of key TSs (TS5, TS5a, TS3d, TS5e, TS5a', and TS3e') and intermediates (Int5, Int5a, Int2, Int5e, Int5a', Int2e) in the solvent phase

| TSs<br>Method | optimization | single point | $\Delta\Delta G^\ddagger$ |
|---------------|--------------|--------------|---------------------------|
| <b>TS5</b>    | 36.1         | 37.6         | 1.5                       |
| <b>TS5a</b>   | 28.3         | 30.2         | 1.9                       |
| <b>TS3d</b>   | 46.7         | 49.2         | 2.5                       |
| <b>TS5e</b>   | 33.8         | 35.9         | 2.1                       |
| <b>TS5a'</b>  | 30.3         | 31.6         | 1.3                       |
| <b>TS3e'</b>  | 35.2         | 36.2         | 1.0                       |

**Table S5.** NBO charges of selected atoms in key transition states in PA3W and PB0

| TSs              | N1            | C1                    | O1            | Na1         | O2                            |
|------------------|---------------|-----------------------|---------------|-------------|-------------------------------|
| <b>TS1</b>       | <b>-0.675</b> | -0.328                | -0.675        | 0.841       | .....                         |
| <b>TS2</b>       | -0.646        | <b>-0.497</b>         | -0.747        | 0.898       | .....                         |
| <b>TS3a/TS3d</b> | -0.492/-0.509 | <b>-0.545/-0.531</b>  | -0.744/-0.782 | 0.897/0.916 | -0.844/.....                  |
| <b>TS4a/TS4d</b> | -0.489/-0.522 | -0.238/ <b>-0.622</b> | -0.765/-0.607 | 0.866/0.844 | <b>-1.100</b> /-0.912         |
| <b>TS5a/TS5d</b> | -0.493/-0.503 | -0.071/-0.269         | -0.693/-0.585 | 0.854/0.873 | <b>-1.256</b> / <b>-1.065</b> |

**Table S6.** Properties of electron density at bond critical points for TSs obtained from AIM analysis, all quantities are in atomic unit

| Specise     | Hydrogen bonds | $\rho(r)$ | $\nabla^2\rho(r)$ | Distance (Å) |
|-------------|----------------|-----------|-------------------|--------------|
| <b>TS3d</b> | Na...C4–O1     | 0.1819    | 0.1006            | 2.476        |
|             | Na...O1        | 0.2862    | 0.1949            | 2.195        |
| <b>TS5a</b> | Na...O1        | 0.2207    | 0.1540            | 2.249        |
|             | Na...O5        | 0.1806    | 0.1211            | 2.331        |
|             | Na...O3        | 0.2098    | 0.1346            | 2.311        |
|             | H4...O2-H5     | 0.6625    | 0.1545            | 1.565        |
|             | H6...O2-H5     | 0.7472    | 0.1546            | 1.508        |
|             | C1-H1...O3     | 0.1264    | 0.4150            | 2.307        |
|             | C1-H2...O4     | 0.1490    | 0.5034            | 2.237        |
|             | C2-H8...O4     | 0.1794    | 0.5789            | 2.164        |
|             | O2-H5...Ph     | 0.3937    | 0.1093            | 2.957        |

To further shed light on the hydrogen bonding and electrostatic interactions in transition states **TS3d** and **TS5a**, topological analysis based on Bader's theory of atoms in molecules (AIM) was carried out. The AIM theory allows one to identify and characterize a bonding interaction between atoms through an analysis of the charge density  $\rho$ . In AIM topological analysis, hydrogen bond is characterized by a bond critical point (bcp) between the interacting hydrogen and hydrogen acceptor. The calculated electron density ( $\rho_{BCP}$ ), Laplacian of electron density ( $\nabla^2\rho_{BCP}$ ), and hydrogen bond distances at the critical points of the hydrogen bonds are listed in Table S2. Two and three electrostatic interactions are considered respectively in **TS3d** and **TS5a**, five HBs interactions are considered in **TS5a**. The sum of corresponding  $\rho$  and  $\nabla^2\rho$  values in **TS5a** are 2.4756 and 2.2161, respectively, which is 2.0075 and 1.9206 larger than those in **TS3d** (0.4681 and 0.2955). Thus, the results of NBO and the AIM topological analyses clearly confirm that two molecules of water and solvent DMSO can intensively stabilize the structure of the transition state **TS5a** by HBs and electrostatic interactions.

**S1.** The B3LYP/6-31+G\*\* optimized coordinates between benzaldehyde and 1-cinnamoylcyclopropanecarboxamides in gas phase.

**1**

|   |             |             |             |
|---|-------------|-------------|-------------|
| C | -5.30399000 | -1.83920200 | -1.50412600 |
| C | -4.04025400 | -1.26784700 | -1.35632600 |
| C | -3.75619400 | -0.40263500 | -0.28224700 |

|            |             |             |             |
|------------|-------------|-------------|-------------|
| C          | -4.78616200 | -0.11712800 | 0.63703000  |
| C          | -6.04813000 | -0.68477200 | 0.48770800  |
| C          | -6.31229200 | -1.54941700 | -0.58215000 |
| H          | -5.50040000 | -2.50811300 | -2.33658300 |
| H          | -3.25614700 | -1.49827500 | -2.07259900 |
| H          | -4.60235200 | 0.55737000  | 1.46742500  |
| H          | -6.83108700 | -0.45203700 | 1.20343500  |
| H          | -7.29834300 | -1.99025700 | -0.69467500 |
| C          | -2.41183200 | 0.16703100  | -0.18271200 |
| C          | -1.89726200 | 0.87216900  | 0.84906900  |
| H          | -1.75854200 | -0.05378000 | -1.02317200 |
| H          | -2.46655300 | 1.03578400  | 1.76071000  |
| C          | -0.48858400 | 1.28581000  | 0.94360000  |
| O          | 0.04543100  | 1.31011400  | 2.06746300  |
| C          | 0.30311500  | 1.75677500  | -0.24112700 |
| C          | -0.35008100 | 2.24275000  | -1.53913600 |
| C          | 0.07366700  | 3.24863700  | -0.52828500 |
| H          | -1.41077700 | 2.07797900  | -1.68424300 |
| H          | 0.26269300  | 2.13383900  | -2.42812200 |
| H          | 0.98653300  | 3.80867500  | -0.70018400 |
| H          | -0.69705200 | 3.74518600  | 0.05404400  |
| C          | 1.76268700  | 1.32096600  | -0.42172700 |
| O          | 2.55690700  | 2.10470000  | -0.94509700 |
| N          | 2.06975400  | 0.04228400  | -0.06755200 |
| H          | 1.34048000  | -0.57454500 | 0.35282600  |
| C          | 3.32885000  | -0.59577200 | -0.21722300 |
| C          | 3.35147400  | -1.99358900 | -0.04900400 |
| C          | 4.52680400  | 0.08280300  | -0.50137200 |
| C          | 4.55005500  | -2.69605800 | -0.15976300 |
| H          | 2.42541900  | -2.50954100 | 0.18351900  |
| C          | 5.71860500  | -0.63935000 | -0.61110100 |
| H          | 4.51692600  | 1.15317600  | -0.64579800 |
| C          | 5.74391000  | -2.02527900 | -0.44337100 |
| H          | 4.54665000  | -3.77474800 | -0.02837300 |
| H          | 6.63668400  | -0.10260700 | -0.83461700 |
| H          | 6.67647300  | -2.57454400 | -0.53489300 |
| Na         | 0.62153500  | -0.66668700 | 2.94181500  |
| H          | 0.49919700  | -1.74986100 | 1.30885000  |
| <b>TS1</b> |             |             |             |
| C          | 4.76663700  | -2.24626200 | 0.64902500  |
| C          | 3.62610100  | -1.45987800 | 0.80821700  |
| C          | 3.33900800  | -0.41094000 | -0.08827300 |
| C          | 4.23835800  | -0.16793900 | -1.14755100 |

|    |             |             |             |
|----|-------------|-------------|-------------|
| C  | 5.37839400  | -0.95046400 | -1.30276300 |
| C  | 5.64624100  | -1.99347900 | -0.40648600 |
| H  | 4.96790400  | -3.05417200 | 1.34603900  |
| H  | 2.93692500  | -1.65862400 | 1.62426600  |
| H  | 4.04837600  | 0.64034000  | -1.84645700 |
| H  | 6.06289700  | -0.74950200 | -2.12165700 |
| H  | 6.53672100  | -2.60243300 | -0.53226600 |
| C  | 2.12453100  | 0.37007100  | 0.13410300  |
| C  | 1.61193200  | 1.32356600  | -0.68336900 |
| H  | 1.57500600  | 0.12151300  | 1.04025500  |
| H  | 2.08822500  | 1.59563300  | -1.62141700 |
| C  | 0.38587800  | 2.06366200  | -0.41036500 |
| O  | 0.01499600  | 2.93652800  | -1.22536500 |
| C  | -0.41985600 | 1.78532300  | 0.84050400  |
| C  | 0.08785600  | 2.35855300  | 2.14205100  |
| C  | -1.15413200 | 2.93333300  | 1.50744700  |
| H  | 0.99055000  | 2.96242100  | 2.11549000  |
| H  | -0.01253200 | 1.71948700  | 3.01374200  |
| H  | -2.11780900 | 2.71505700  | 1.95627300  |
| H  | -1.06701500 | 3.93082000  | 1.07863900  |
| C  | -1.05235400 | 0.36845400  | 0.90786200  |
| O  | -0.53411300 | -0.47061700 | 1.66478400  |
| N  | -2.09580100 | 0.20959900  | 0.07567100  |
| H  | -2.80196600 | 1.24468600  | -0.33322500 |
| C  | -2.81037600 | -0.99924400 | -0.06543100 |
| C  | -3.63509000 | -1.10746600 | -1.20448300 |
| C  | -2.78393300 | -2.07381100 | 0.84683300  |
| C  | -4.40801900 | -2.24566600 | -1.42627100 |
| H  | -3.66189900 | -0.28534100 | -1.91211200 |
| C  | -3.56015800 | -3.21135400 | 0.61108600  |
| H  | -2.14942600 | -2.01095600 | 1.71973800  |
| C  | -4.37500300 | -3.30998900 | -0.51962900 |
| H  | -5.03390800 | -2.30317200 | -2.31308000 |
| H  | -3.52293800 | -4.03083300 | 1.32449300  |
| H  | -4.97299700 | -4.20019300 | -0.69266600 |
| Na | -2.14924200 | 3.32948500  | -1.31113700 |
| H  | -3.43701300 | 1.98762400  | -0.62363700 |

**Int1**

|   |            |             |             |
|---|------------|-------------|-------------|
| C | 4.87541700 | -2.16168200 | 0.74711800  |
| C | 3.72644900 | -1.37974900 | 0.86180500  |
| C | 3.41299300 | -0.40598200 | -0.10744600 |
| C | 4.29333500 | -0.23584300 | -1.19627600 |
| C | 5.44138600 | -1.01427300 | -1.30806300 |

|    |             |             |             |
|----|-------------|-------------|-------------|
| C  | 5.73667200  | -1.98087500 | -0.33781900 |
| H  | 5.09729200  | -2.91028300 | 1.50177000  |
| H  | 3.05233100  | -1.52361800 | 1.70166900  |
| H  | 4.08099000  | 0.51132600  | -1.95431400 |
| H  | 6.11031500  | -0.86985400 | -2.15141000 |
| H  | 6.63322200  | -2.58694400 | -0.42988100 |
| C  | 2.19354600  | 0.37870200  | 0.07359400  |
| C  | 1.66451800  | 1.27805400  | -0.79252500 |
| H  | 1.64885900  | 0.17779000  | 0.99458700  |
| H  | 2.12071500  | 1.49616900  | -1.75438700 |
| C  | 0.40751200  | 1.97875200  | -0.54999900 |
| O  | -0.09022000 | 2.68772600  | -1.45188800 |
| C  | -0.31428000 | 1.80628800  | 0.76630300  |
| C  | 0.27199900  | 2.39776500  | 2.01492300  |
| C  | -0.95945100 | 3.02737100  | 1.39896100  |
| H  | 1.20639900  | 2.94679900  | 1.93735500  |
| H  | 0.15596000  | 1.80836500  | 2.91945100  |
| H  | -1.90785700 | 2.88512000  | 1.91095500  |
| H  | -0.83909100 | 3.99250600  | 0.91004300  |
| C  | -1.06515200 | 0.43906300  | 0.88697800  |
| O  | -0.62883700 | -0.38659300 | 1.71157000  |
| N  | -2.09826400 | 0.37134800  | 0.03463100  |
| C  | -2.93539100 | -0.75023300 | -0.05146400 |
| C  | -3.94841700 | -0.70830700 | -1.03783500 |
| C  | -2.87190400 | -1.91070900 | 0.75669400  |
| C  | -4.84973100 | -1.75431600 | -1.21922900 |
| H  | -4.01930600 | 0.16914900  | -1.68124000 |
| C  | -3.78052800 | -2.95511000 | 0.57009500  |
| H  | -2.10789700 | -1.97331700 | 1.51891800  |
| C  | -4.77376100 | -2.89365900 | -0.41125800 |
| H  | -5.61101400 | -1.68038000 | -1.99175000 |
| H  | -3.70678800 | -3.83297900 | 1.20754200  |
| H  | -5.47332300 | -3.71359600 | -0.54483600 |
| Na | -2.28652400 | 2.28760900  | -1.16379000 |

## TS2

|   |            |             |             |
|---|------------|-------------|-------------|
| C | 3.33220300 | -1.51179600 | -1.54963500 |
| C | 1.98942200 | -1.13301700 | -1.56491000 |
| C | 1.10876500 | -1.53935600 | -0.54825000 |
| C | 1.62061500 | -2.32835200 | 0.49674400  |
| C | 2.96137000 | -2.71108500 | 0.51489800  |
| C | 3.82276700 | -2.30368800 | -0.50891400 |
| H | 3.99368500 | -1.18776900 | -2.34760300 |
| H | 1.61403700 | -0.51456300 | -2.37526100 |

|    |             |             |             |
|----|-------------|-------------|-------------|
| H  | 0.96504400  | -2.65810900 | 1.29677700  |
| H  | 3.33540400  | -3.32816400 | 1.32695200  |
| H  | 4.86723500  | -2.60124800 | -0.49387300 |
| C  | -0.31490900 | -1.12647600 | -0.61609900 |
| C  | -1.34178500 | -1.89691600 | 0.02275700  |
| H  | -0.55569300 | -0.68300000 | -1.58057200 |
| H  | -1.10023600 | -2.78544900 | 0.59963400  |
| C  | -2.58626300 | -1.28422100 | 0.21643100  |
| O  | -3.42639200 | -1.63414600 | 1.11226200  |
| C  | -2.78089400 | 0.06265100  | -0.47715800 |
| C  | -3.47688900 | 0.11742700  | -1.84415400 |
| C  | -4.19012800 | 0.58971000  | -0.61709700 |
| H  | -3.75649300 | -0.83842000 | -2.27788900 |
| H  | -3.11934300 | 0.86551400  | -2.54572200 |
| H  | -4.31512100 | 1.66043500  | -0.49611300 |
| H  | -4.95947600 | -0.04516000 | -0.18999300 |
| C  | -1.68943900 | 1.10301300  | -0.24602400 |
| O  | -1.91883400 | 2.29605000  | -0.45560900 |
| N  | -0.49772200 | 0.59724400  | 0.26199900  |
| C  | 0.63988900  | 1.44027800  | 0.32652600  |
| C  | 1.52217400  | 1.27836100  | 1.40894400  |
| C  | 0.97292400  | 2.37724200  | -0.67047800 |
| C  | 2.69517300  | 2.02773300  | 1.50497600  |
| H  | 1.28783300  | 0.54316200  | 2.17565300  |
| C  | 2.14582200  | 3.12615600  | -0.57119100 |
| H  | 0.29857100  | 2.53352000  | -1.50328600 |
| C  | 3.01280500  | 2.95957300  | 0.51347700  |
| H  | 3.35952100  | 1.88195400  | 2.35216500  |
| H  | 2.38135300  | 3.84983000  | -1.34683000 |
| H  | 3.92254800  | 3.54827800  | 0.58501100  |
| Na | -1.69406600 | -0.47274200 | 2.27169900  |

## Int2

|   |             |            |             |
|---|-------------|------------|-------------|
| C | -1.39092100 | 3.83534000 | -0.36921500 |
| C | -1.03196300 | 2.62991700 | -0.98560100 |
| C | -0.33051800 | 1.64451600 | -0.28385300 |
| C | -0.00289700 | 1.88433400 | 1.06047600  |
| C | -0.36839000 | 3.07785400 | 1.68339900  |
| C | -1.05963500 | 4.06417100 | 0.96675200  |
| H | -1.93836000 | 4.58694600 | -0.93144900 |
| H | -1.30798100 | 2.45199900 | -2.02266400 |
| H | 0.52637500  | 1.11907800 | 1.62365800  |
| H | -0.12355100 | 3.23839200 | 2.73027200  |

|    |             |             |             |
|----|-------------|-------------|-------------|
| H  | -1.34588500 | 4.99309200  | 1.45150100  |
| C  | 0.13375900  | 0.36333400  | -0.99679900 |
| C  | 1.61901800  | 0.40630000  | -1.24183200 |
| H  | -0.39035000 | 0.34265500  | -1.96256300 |
| H  | 1.93604200  | 1.06887500  | -2.04934700 |
| C  | 2.54544100  | -0.42936200 | -0.65325800 |
| O  | 3.83272300  | -0.28127800 | -0.76564700 |
| C  | 2.03530400  | -1.54737400 | 0.20763900  |
| C  | 2.87040900  | -2.83084100 | 0.21899300  |
| C  | 2.87187000  | -1.96003200 | 1.42484600  |
| H  | 3.74581800  | -2.80772200 | -0.42058600 |
| H  | 2.30423500  | -3.75466900 | 0.26351200  |
| H  | 2.31091700  | -2.29366200 | 2.29163000  |
| H  | 3.75620700  | -1.35724900 | 1.60584100  |
| C  | 0.55414200  | -1.75626900 | 0.34710700  |
| O  | 0.10631700  | -2.71483000 | 0.97852500  |
| N  | -0.28986900 | -0.84459100 | -0.25856100 |
| C  | -1.70830700 | -1.08589100 | -0.19581500 |
| C  | -2.39921300 | -0.98896700 | 1.01569300  |
| C  | -2.40277400 | -1.40930100 | -1.36592200 |
| C  | -3.77670100 | -1.21060200 | 1.05335200  |
| H  | -1.85307300 | -0.75665800 | 1.92287900  |
| C  | -3.78311100 | -1.62202000 | -1.32788600 |
| H  | -1.85922700 | -1.50950400 | -2.30103200 |
| C  | -4.47375700 | -1.52271000 | -0.11758400 |
| H  | -4.30564100 | -1.13938900 | 1.99941900  |
| H  | -4.31377000 | -1.87635000 | -2.24098900 |
| H  | -5.54605200 | -1.69290500 | -0.08564100 |
| Na | 3.59186500  | 1.81942700  | -0.40095400 |

**Int3**

|   |             |             |             |
|---|-------------|-------------|-------------|
| C | 3.52026000  | -1.97250100 | -3.06297200 |
| C | 2.65591300  | -1.01660700 | -2.51551500 |
| C | 2.13066300  | -1.17496200 | -1.22933600 |
| C | 2.48743100  | -2.31502700 | -0.49401500 |
| C | 3.35641800  | -3.26508500 | -1.02921100 |
| C | 3.87559800  | -3.09855300 | -2.31971600 |
| H | 3.91866000  | -1.83092200 | -4.06409400 |
| H | 2.39305800  | -0.13382100 | -3.09438700 |
| H | 2.07321600  | -2.45743600 | 0.50056100  |
| H | 3.62784100  | -4.13948400 | -0.44337500 |
| H | 4.55015500  | -3.84070700 | -2.73757900 |
| C | 1.16142100  | -0.13286600 | -0.64681800 |
| C | -0.19254500 | -0.72096000 | -0.36727200 |



|            |             |             |             |
|------------|-------------|-------------|-------------|
| H          | 1.06303300  | 0.64947100  | -1.41329400 |
| H          | -0.72842000 | -1.09374600 | -1.23659800 |
| C          | -0.70756200 | -0.93315800 | 0.87423900  |
| O          | -1.85708900 | -1.51463100 | 1.11638300  |
| C          | 0.07671400  | -0.45109700 | 2.06492100  |
| C          | -0.69857900 | -0.08209900 | 3.32740600  |
| C          | 0.10514600  | -1.33838400 | 3.31383900  |
| H          | -1.77615000 | -0.17202700 | 3.24410900  |
| H          | -0.30831700 | 0.75702900  | 3.89271400  |
| H          | 1.03647800  | -1.34872100 | 3.87083300  |
| H          | -0.42285400 | -2.28262500 | 3.22604200  |
| C          | 1.32162400  | 0.36135700  | 1.83970100  |
| O          | 1.92452600  | 0.87673600  | 2.78500700  |
| N          | 1.75258800  | 0.52875500  | 0.54098900  |
| C          | 2.91297800  | 1.34537900  | 0.30605200  |
| C          | 4.17697400  | 0.94534900  | 0.75070100  |
| C          | 2.77553100  | 2.54669500  | -0.39678000 |
| C          | 5.29307400  | 1.74146800  | 0.48992300  |
| H          | 4.27604600  | 0.01958000  | 1.30585300  |
| C          | 3.89517200  | 3.33855100  | -0.66492200 |
| H          | 1.78903200  | 2.86330100  | -0.72336700 |
| C          | 5.15780000  | 2.93753700  | -0.22155400 |
| H          | 6.27090700  | 1.42526500  | 0.84195400  |
| H          | 3.77779900  | 4.27077000  | -1.21049900 |
| H          | 6.02915200  | 3.55343900  | -0.42513400 |
| Na         | -3.49462100 | -2.69014500 | 0.73527300  |
| C          | -5.90982700 | 1.55067700  | -1.35831900 |
| C          | -5.16537600 | 0.49782200  | -0.78907000 |
| C          | -3.84143000 | 0.72242900  | -0.35584600 |
| C          | -3.28581600 | 1.99181200  | -0.49316700 |
| C          | -4.03286000 | 3.03421200  | -1.05668400 |
| C          | -5.34542300 | 2.81599100  | -1.49195100 |
| H          | -6.92895500 | 1.36849000  | -1.69132000 |
| H          | -3.24602200 | -0.07458500 | 0.08788100  |
| H          | -2.26630100 | 2.16141300  | -0.16296700 |
| H          | -3.58912600 | 4.02053000  | -1.15853800 |
| H          | -5.91886400 | 3.62701500  | -1.92978600 |
| C          | -5.81578700 | -0.80504800 | -0.67026600 |
| O          | -5.32239600 | -1.82948000 | -0.19157200 |
| H          | -6.85306400 | -0.85049500 | -1.05268900 |
| <b>TS3</b> |             |             |             |
| C          | 2.15443400  | 3.77597700  | -0.08859300 |
| C          | 1.55103600  | 2.62351200  | 0.42641000  |

|    |             |             |             |
|----|-------------|-------------|-------------|
| C  | 1.25722300  | 1.53679800  | -0.40241100 |
| C  | 1.58392000  | 1.61927300  | -1.76273200 |
| C  | 2.19186100  | 2.76222000  | -2.28062300 |
| C  | 2.47764100  | 3.84737500  | -1.44404200 |
| H  | 2.37329100  | 4.61141100  | 0.57040700  |
| H  | 1.31269200  | 2.56865900  | 1.48609600  |
| H  | 1.35821100  | 0.78322900  | -2.41944300 |
| H  | 2.43854500  | 2.81048100  | -3.33762900 |
| H  | 2.94752400  | 4.73941000  | -1.84827500 |
| C  | 0.58745600  | 0.28111100  | 0.16921000  |
| C  | -0.78077400 | 0.03151400  | -0.46875200 |
| H  | 0.42735000  | 0.47701000  | 1.24045400  |
| H  | -1.09365200 | 0.64354200  | -1.62144900 |
| C  | -1.20091400 | -1.30221900 | -0.82313100 |
| O  | -2.38616600 | -1.59964300 | -1.13771300 |
| C  | -0.15028200 | -2.35287200 | -0.95900900 |
| C  | -0.62469100 | -3.80963800 | -0.82889100 |
| C  | -0.25967100 | -3.29657600 | -2.16927200 |
| H  | -1.67785200 | -3.92277900 | -0.59652000 |
| H  | 0.07492100  | -4.47360600 | -0.33380300 |
| H  | 0.68855600  | -3.60869200 | -2.59369000 |
| H  | -1.06063400 | -3.06240400 | -2.86277100 |
| C  | 1.24206700  | -2.10368200 | -0.45930500 |
| O  | 2.09555600  | -2.99023900 | -0.51606700 |
| N  | 1.51647200  | -0.87276000 | 0.08873100  |
| C  | 2.79586400  | -0.70646500 | 0.73626500  |
| C  | 3.95969500  | -0.53343800 | -0.01641800 |
| C  | 2.86202100  | -0.71185900 | 2.13224300  |
| C  | 5.18588700  | -0.36351300 | 0.62783300  |
| H  | 3.89850200  | -0.54062900 | -1.09879300 |
| C  | 4.08932700  | -0.53373400 | 2.77580100  |
| H  | 1.95637200  | -0.86741900 | 2.71170900  |
| C  | 5.25380200  | -0.35885400 | 2.02418700  |
| H  | 6.08864300  | -0.23327100 | 0.03818300  |
| H  | 4.13493200  | -0.54103500 | 3.86106200  |
| H  | 6.20908600  | -0.22357100 | 2.52306000  |
| Na | -3.79895300 | -0.07277100 | -1.82320500 |
| C  | -2.93808000 | -0.13409500 | 1.79595900  |
| C  | -3.02864500 | 0.77990700  | 0.73596600  |
| C  | -4.24189100 | 1.46671300  | 0.55194400  |
| C  | -5.33738400 | 1.23213700  | 1.39210800  |
| C  | -5.23434300 | 0.31101300  | 2.43728000  |
| C  | -4.02760800 | -0.36700300 | 2.63789200  |
| H  | -2.01276500 | -0.68064500 | 1.95415100  |

|   |             |             |             |
|---|-------------|-------------|-------------|
| H | -4.30521800 | 2.21021600  | -0.23966500 |
| H | -6.26302600 | 1.78064300  | 1.23809100  |
| H | -6.08115200 | 0.12670300  | 3.09187600  |
| H | -3.93706700 | -1.08576300 | 3.44765800  |
| C | -1.84829100 | 1.10334000  | -0.17378000 |
| O | -2.21994900 | 1.42080000  | -1.52803500 |
| H | -1.33758800 | 1.96929500  | 0.28110000  |

**Int4**

|   |             |             |             |
|---|-------------|-------------|-------------|
| C | 2.08785300  | 3.80954200  | 0.21936600  |
| C | 1.59229800  | 2.59312800  | 0.70474000  |
| C | 1.21731600  | 1.56746000  | -0.17013700 |
| C | 1.35459200  | 1.78198000  | -1.55181600 |
| C | 1.85838900  | 2.98793000  | -2.04037600 |
| C | 2.22343700  | 4.01020100  | -1.15467400 |
| H | 2.37265500  | 4.59309800  | 0.91611200  |
| H | 1.50560600  | 2.43768400  | 1.77780500  |
| H | 1.06731700  | 0.99524400  | -2.24489200 |
| H | 1.96764100  | 3.13240400  | -3.11199700 |
| H | 2.61189000  | 4.95037300  | -1.53557100 |
| C | 0.63909700  | 0.24458400  | 0.37000300  |
| C | -0.76974700 | -0.00691100 | -0.12835800 |
| H | 0.61377900  | 0.35269400  | 1.46332100  |
| H | -1.48123000 | 2.23320700  | -1.10189400 |
| C | -1.04847000 | -0.91876500 | -1.12918800 |
| O | -2.20090200 | -1.06557200 | -1.70062800 |
| C | 0.05573000  | -1.83023500 | -1.59320500 |
| C | -0.36392900 | -3.18913100 | -2.15426400 |
| C | 0.12929900  | -2.14618700 | -3.09392300 |
| H | -1.43137200 | -3.37750100 | -2.12915500 |
| H | 0.30097300  | -4.01403500 | -1.92375500 |
| H | 1.12675000  | -2.26406600 | -3.50514000 |
| H | -0.60159000 | -1.63288500 | -3.71067000 |
| C | 1.37494300  | -1.83042600 | -0.87863900 |
| O | 2.24817300  | -2.65964600 | -1.14121000 |
| N | 1.56189400  | -0.87809500 | 0.10118800  |
| C | 2.80338600  | -0.87141400 | 0.82860000  |
| C | 4.01029800  | -0.56991300 | 0.19022300  |
| C | 2.79365800  | -1.14934800 | 2.19924800  |
| C | 5.19861100  | -0.54527400 | 0.92186100  |
| H | 4.01246100  | -0.36894600 | -0.87505300 |
| C | 3.98298000  | -1.11543900 | 2.93176500  |
| H | 1.85598800  | -1.40499900 | 2.68462700  |
| C | 5.18884100  | -0.81310600 | 2.29409800  |

|    |             |             |             |
|----|-------------|-------------|-------------|
| H  | 6.13340900  | -0.31515300 | 0.41876000  |
| H  | 3.96719300  | -1.33658300 | 3.99525300  |
| H  | 6.11523200  | -0.79146500 | 2.86087000  |
| Na | -3.71732100 | 0.41372300  | -1.64971700 |
| C  | -3.12729900 | -0.95197600 | 1.46481100  |
| C  | -3.07614900 | 0.36995800  | 1.00070300  |
| C  | -4.21232400 | 1.18403800  | 1.16978000  |
| C  | -5.37130500 | 0.68173800  | 1.77376800  |
| C  | -5.40847000 | -0.63846300 | 2.22946200  |
| C  | -4.28037900 | -1.45006600 | 2.07542300  |
| H  | -2.25820800 | -1.58634600 | 1.32719000  |
| H  | -4.17737800 | 2.21957400  | 0.84388200  |
| H  | -6.23549300 | 1.32817900  | 1.90122200  |
| H  | -6.30435700 | -1.02948900 | 2.70302800  |
| H  | -4.29968800 | -2.47900800 | 2.42317700  |
| C  | -1.80082700 | 0.95123500  | 0.38202400  |
| O  | -2.28163900 | 1.90515800  | -0.66562500 |
| H  | -1.34032200 | 1.58338800  | 1.15339500  |

#### TS4

|   |             |             |             |
|---|-------------|-------------|-------------|
| C | -1.60441000 | 3.91231300  | -0.73522900 |
| C | -1.23353100 | 2.60661500  | -1.06888800 |
| C | -1.19360100 | 1.59856200  | -0.09754600 |
| C | -1.54611000 | 1.92328900  | 1.21993400  |
| C | -1.92094200 | 3.22538000  | 1.55692500  |
| C | -1.94859100 | 4.22637800  | 0.58102300  |
| H | -1.62983400 | 4.67880000  | -1.50449900 |
| H | -0.97385500 | 2.37018300  | -2.09790400 |
| H | -1.53802800 | 1.15798700  | 1.98990900  |
| H | -2.19528900 | 3.45727700  | 2.58235700  |
| H | -2.24201700 | 5.23847100  | 0.84388900  |
| C | -0.73332500 | 0.19040100  | -0.49662700 |
| C | 0.71828300  | -0.09228000 | -0.11733000 |
| H | -0.80248100 | 0.13470600  | -1.58570100 |
| H | 1.68848400  | 3.04509700  | -0.68638100 |
| C | 0.95975500  | -0.52193300 | 1.24596100  |
| O | 2.02102400  | -0.28393100 | 1.87170900  |
| C | -0.13865800 | -1.26983600 | 1.92126200  |
| C | 0.31070800  | -2.37753500 | 2.89189900  |
| C | -0.25908200 | -1.13335600 | 3.45142300  |
| H | 1.38419500  | -2.51912500 | 2.95536500  |
| H | -0.31455900 | -3.26328000 | 2.88043000  |
| H | -1.27265900 | -1.16717500 | 3.83699500  |

|    |             |             |             |
|----|-------------|-------------|-------------|
| H  | 0.41894600  | -0.41413600 | 3.89932200  |
| C  | -1.43003000 | -1.54245300 | 1.19296000  |
| O  | -2.25442500 | -2.33367400 | 1.64999000  |
| N  | -1.63638200 | -0.86502700 | 0.01497800  |
| C  | -2.86444300 | -1.07402300 | -0.70877800 |
| C  | -4.08521300 | -0.62988600 | -0.19346500 |
| C  | -2.82000400 | -1.70761600 | -1.95467100 |
| C  | -5.25811400 | -0.81929700 | -0.92654200 |
| H  | -4.11223400 | -0.14936200 | 0.77807100  |
| C  | -3.99414500 | -1.88788500 | -2.68944600 |
| H  | -1.86917500 | -2.06731600 | -2.33773200 |
| C  | -5.21560600 | -1.44377200 | -2.17640300 |
| H  | -6.20524200 | -0.47595800 | -0.52089700 |
| H  | -3.95436000 | -2.38281300 | -3.65541200 |
| H  | -6.12966300 | -1.58722600 | -2.74514600 |
| Na | 3.19014700  | 1.48814100  | 1.11660300  |
| C  | 3.37335700  | -1.61630100 | -0.62043500 |
| C  | 3.09456600  | -0.30653100 | -1.05732600 |
| C  | 4.13154400  | 0.43251900  | -1.66239200 |
| C  | 5.40930900  | -0.11561100 | -1.79639700 |
| C  | 5.67540000  | -1.41197100 | -1.34531500 |
| C  | 4.64978500  | -2.16090300 | -0.75988700 |
| H  | 2.57973200  | -2.21709000 | -0.18977000 |
| H  | 3.91261700  | 1.44843900  | -1.97543400 |
| H  | 6.19716100  | 0.47214600  | -2.25943800 |
| H  | 6.66820900  | -1.83860400 | -1.45695500 |
| H  | 4.84001500  | -3.17513000 | -0.42046100 |
| C  | 1.71142600  | 0.23650300  | -1.01258700 |
| O  | 2.45693300  | 2.46757700  | -0.60006100 |
| H  | 1.39487600  | 0.69533800  | -1.94394100 |

### Int5

|   |             |            |             |
|---|-------------|------------|-------------|
| C | -0.43396000 | 3.95178700 | -1.10333300 |
| C | -0.15432000 | 2.58202700 | -1.08119100 |
| C | -1.11010500 | 1.68259000 | -0.57880100 |
| C | -2.33574300 | 2.17544100 | -0.11183400 |
| C | -2.60802000 | 3.54623200 | -0.13938800 |
| C | -1.65678800 | 4.44036900 | -0.63567100 |
| H | 0.31843100  | 4.63331100 | -1.49031300 |
| H | 0.82161300  | 2.25113900 | -1.45282100 |
| H | -3.08567800 | 1.49365700 | 0.27276200  |
| H | -3.56387600 | 3.91070400 | 0.22666000  |
| H | -1.86701300 | 5.50612100 | -0.65670600 |

|    |             |             |             |
|----|-------------|-------------|-------------|
| C  | -0.80486300 | 0.17434600  | -0.61026000 |
| C  | 0.61407400  | -0.14848700 | -0.17238700 |
| H  | -0.92722100 | -0.16926600 | -1.63915300 |
| H  | 3.17269000  | 2.80812500  | -2.50032800 |
| C  | 0.83840900  | 0.15897000  | 1.25976900  |
| O  | 1.90128400  | 0.63172000  | 1.69005600  |
| C  | -0.32698000 | -0.07574700 | 2.14568600  |
| C  | 0.00312500  | -0.44337400 | 3.60523900  |
| C  | -0.52617600 | 0.90379000  | 3.32679000  |
| H  | 1.06266700  | -0.54308100 | 3.81575300  |
| H  | -0.66678100 | -1.17971200 | 4.03470800  |
| H  | -1.56260700 | 1.11273500  | 3.56940300  |
| H  | 0.15613100  | 1.74734400  | 3.33635000  |
| C  | -1.58497100 | -0.69886600 | 1.58144300  |
| O  | -2.40268000 | -1.23375200 | 2.32642000  |
| N  | -1.74252400 | -0.63141300 | 0.21241700  |
| C  | -2.83021000 | -1.31414700 | -0.43563500 |
| C  | -4.15112400 | -1.15643200 | 0.00166500  |
| C  | -2.55953600 | -2.15287600 | -1.52508200 |
| C  | -5.18651300 | -1.82203100 | -0.65679600 |
| H  | -4.36354600 | -0.53345900 | 0.86123700  |
| C  | -3.60092900 | -2.80667700 | -2.18624300 |
| H  | -1.53471100 | -2.30923100 | -1.84744200 |
| C  | -4.91929900 | -2.64318500 | -1.75510200 |
| H  | -6.20697700 | -1.69369500 | -0.30802400 |
| H  | -3.37652600 | -3.45275700 | -3.02983800 |
| H  | -5.72930100 | -3.15489900 | -2.26607700 |
| Na | 3.27871900  | 1.64890300  | 0.14659000  |
| C  | 3.08451500  | -2.09284900 | 0.31225100  |
| C  | 2.89112300  | -1.14856300 | -0.71291400 |
| C  | 3.99101600  | -0.75958900 | -1.50324400 |
| C  | 5.25782300  | -1.29128600 | -1.24741000 |
| C  | 5.44109800  | -2.22726000 | -0.22464000 |
| C  | 4.34976200  | -2.62805000 | 0.55334400  |
| H  | 2.23602100  | -2.42472800 | 0.90344500  |
| H  | 3.84150800  | 0.01691700  | -2.25186200 |
| H  | 6.10235900  | -0.97288000 | -1.85202100 |
| H  | 6.42555800  | -2.64680400 | -0.03793300 |
| H  | 4.48203600  | -3.36343100 | 1.34167200  |
| C  | 1.54645500  | -0.61803000 | -1.02726100 |
| O  | 2.97030800  | 2.14719100  | -1.83151400 |
| H  | 1.27849900  | -0.64406000 | -2.08254100 |

**TS5**

|    |             |             |             |
|----|-------------|-------------|-------------|
| C  | -0.39378100 | 3.93452000  | -1.01251900 |
| C  | -0.16290200 | 2.55667100  | -1.06405500 |
| C  | -1.09425500 | 1.66860600  | -0.49964300 |
| C  | -2.24698300 | 2.18350000  | 0.10730300  |
| C  | -2.47229700 | 3.56284500  | 0.15310200  |
| C  | -1.54604500 | 4.44451000  | -0.40812000 |
| H  | 0.34267200  | 4.60355100  | -1.44861800 |
| H  | 0.76553800  | 2.21476200  | -1.53152100 |
| H  | -2.97747400 | 1.51227600  | 0.54380800  |
| H  | -3.37394000 | 3.94307800  | 0.62552500  |
| H  | -1.72069300 | 5.51641300  | -0.37422400 |
| C  | -0.84052500 | 0.15102400  | -0.60490800 |
| C  | 0.58221000  | -0.22455100 | -0.21734200 |
| H  | -0.98776500 | -0.13960600 | -1.64648800 |
| H  | 3.19998200  | 2.92279800  | -2.49194300 |
| C  | 0.80386700  | -0.01784300 | 1.24182100  |
| O  | 1.85170000  | 0.53621100  | 1.70359900  |
| C  | -0.25527900 | -0.43861100 | 2.05692400  |
| C  | 0.61681700  | 0.61151100  | 3.82582000  |
| C  | 0.02332300  | -0.66648200 | 3.54238500  |
| H  | 0.00989400  | 1.50702100  | 3.73217300  |
| H  | 1.65509100  | 0.73663900  | 4.10888700  |
| H  | 0.65143200  | -1.53178500 | 3.76528800  |
| H  | -0.98731200 | -0.79968400 | 3.95903200  |
| C  | -1.59290400 | -0.80975500 | 1.56319600  |
| O  | -2.44839200 | -1.27667000 | 2.32350200  |
| N  | -1.79875600 | -0.64781800 | 0.19845200  |
| C  | -2.94755800 | -1.21591500 | -0.44658900 |
| C  | -4.23908400 | -1.03323000 | 0.06684500  |
| C  | -2.77419200 | -1.97012900 | -1.61654900 |
| C  | -5.33680700 | -1.58738400 | -0.59388300 |
| H  | -4.37896400 | -0.47817600 | 0.98522800  |
| C  | -3.87757500 | -2.51113800 | -2.27804300 |
| H  | -1.77533100 | -2.15057800 | -2.00130900 |
| C  | -5.16485500 | -2.32181700 | -1.76979400 |
| H  | -6.33214400 | -1.43881300 | -0.18535700 |
| H  | -3.72594000 | -3.09202900 | -3.18310700 |
| H  | -6.02332500 | -2.74658000 | -2.28138000 |
| Na | 3.09768000  | 1.62937900  | 0.09683700  |
| C  | 3.08989500  | -2.11965400 | 0.14869700  |
| C  | 2.86004300  | -1.14847000 | -0.84352200 |
| C  | 3.94027800  | -0.70757100 | -1.63392900 |
| C  | 5.22157700  | -1.22012700 | -1.41393500 |

|   |            |             |             |
|---|------------|-------------|-------------|
| C | 5.44000600 | -2.18611200 | -0.42660200 |
| C | 4.36968400 | -2.63493000 | 0.35445200  |
| H | 2.25655800 | -2.48768100 | 0.74008100  |
| H | 3.76706500 | 0.09457900  | -2.35027500 |
| H | 6.05061100 | -0.86114100 | -2.01727900 |
| H | 6.43596700 | -2.59027700 | -0.26841700 |
| H | 4.53020000 | -3.39278300 | 1.11606700  |
| C | 1.49954700 | -0.63379500 | -1.11345300 |
| O | 2.95969600 | 2.22431300  | -1.87611000 |
| H | 1.21742800 | -0.59531800 | -2.16442000 |

**Pr+NaOH**

|   |             |             |             |
|---|-------------|-------------|-------------|
| C | -0.43217500 | 3.92566400  | -1.01888700 |
| C | -0.19891100 | 2.54710900  | -1.04707600 |
| C | -1.15179800 | 1.66186400  | -0.51562600 |
| C | -2.33226000 | 2.18295300  | 0.03107100  |
| C | -2.56085900 | 3.56188000  | 0.05247400  |
| C | -1.61066800 | 4.44013900  | -0.47290500 |
| H | 0.32354000  | 4.59055800  | -1.42734400 |
| H | 0.74766800  | 2.20696500  | -1.47422200 |
| H | -3.08144100 | 1.51689600  | 0.44219300  |
| H | -3.48306000 | 3.94476900  | 0.48082200  |
| H | -1.78707400 | 5.51210600  | -0.45585000 |
| C | -0.90386300 | 0.14070800  | -0.59125800 |
| C | 0.52960000  | -0.23260400 | -0.23065600 |
| H | -1.08747700 | -0.17841300 | -1.61863400 |
| H | 3.20713700  | 3.04022000  | -2.31762100 |
| C | 0.70435800  | -0.12995700 | 1.20939600  |
| O | 1.89795100  | 0.23720500  | 1.79393000  |
| C | -0.31185400 | -0.26859900 | 2.07807600  |
| C | 1.69402700  | 0.13638300  | 3.25246500  |
| C | 0.16776200  | 0.00436600  | 3.47912600  |
| H | 2.13729700  | 1.02790500  | 3.69892700  |
| H | 2.24378800  | -0.74984400 | 3.58245000  |
| H | -0.07445400 | -0.80583800 | 4.17266800  |
| H | -0.27577400 | 0.92347700  | 3.88179500  |
| C | -1.64943800 | -0.69621200 | 1.64279800  |
| O | -2.48760800 | -1.11795000 | 2.43990800  |
| N | -1.85049500 | -0.63441800 | 0.26328900  |
| C | -3.00431600 | -1.22848300 | -0.34586400 |
| C | -4.29121200 | -1.03886200 | 0.17814500  |
| C | -2.84267000 | -2.02184900 | -1.49211100 |
| C | -5.39304800 | -1.62531400 | -0.44740900 |
| H | -4.42430500 | -0.45386700 | 1.07864200  |



|    |             |             |             |
|----|-------------|-------------|-------------|
| C  | -3.95064900 | -2.59238000 | -2.12029800 |
| H  | -1.84788000 | -2.21019000 | -1.88379800 |
| C  | -5.23242700 | -2.39695400 | -1.60067200 |
| H  | -6.38350500 | -1.47143100 | -0.02896500 |
| H  | -3.80636200 | -3.20197700 | -3.00760900 |
| H  | -6.09440200 | -2.84551300 | -2.08535800 |
| Na | 3.07073600  | 1.57057500  | 0.16558900  |
| C  | 3.03225500  | -2.15189800 | 0.02145600  |
| C  | 2.81608100  | -1.11474700 | -0.90667800 |
| C  | 3.90347900  | -0.63910800 | -1.66712100 |
| C  | 5.17756700  | -1.18263600 | -1.48062300 |
| C  | 5.38180300  | -2.21351500 | -0.55829900 |
| C  | 4.30451400  | -2.69770300 | 0.19188100  |
| H  | 2.19311200  | -2.54767700 | 0.58607900  |
| H  | 3.74225600  | 0.20856800  | -2.33233100 |
| H  | 6.01156300  | -0.79739200 | -2.06036700 |
| H  | 6.37172200  | -2.64147000 | -0.42745400 |
| H  | 4.45325100  | -3.50792700 | 0.90009200  |
| C  | 1.45695500  | -0.58117900 | -1.14902600 |
| O  | 2.97687400  | 2.29942400  | -1.74965600 |
| H  | 1.17851200  | -0.47914700 | -2.19633400 |

### Int3a

|   |             |             |             |
|---|-------------|-------------|-------------|
| C | 2.53140000  | 3.96701300  | -0.36240700 |
| C | 2.26065400  | 2.82760800  | 0.40475700  |
| C | 2.39357600  | 1.54490500  | -0.13706700 |
| C | 2.82412700  | 1.42327900  | -1.46821100 |
| C | 3.10302000  | 2.55511600  | -2.23631600 |
| C | 2.95192200  | 3.83557700  | -1.68671000 |
| H | 2.42385300  | 4.95381900  | 0.07980000  |
| H | 1.94495300  | 2.93827000  | 1.43986300  |
| H | 2.94477400  | 0.43374600  | -1.90168400 |
| H | 3.44950600  | 2.44050300  | -3.26032200 |
| H | 3.17338500  | 4.71632600  | -2.28268100 |
| C | 2.01410800  | 0.30785300  | 0.69546800  |
| C | 0.66778500  | -0.24882300 | 0.29458000  |
| H | 1.95124000  | 0.65161000  | 1.73674100  |
| H | -0.19631400 | 0.28476500  | 0.68552800  |
| C | 0.47744400  | -1.48794400 | -0.27965700 |
| O | -0.66999300 | -1.98640800 | -0.59309400 |
| C | 1.70222100  | -2.30943200 | -0.59175900 |
| C | 1.50950000  | -3.81888000 | -0.72205300 |
| C | 1.76292100  | -3.01918700 | -1.95143000 |

|    |             |             |             |
|----|-------------|-------------|-------------|
| H  | 0.49647600  | -4.16003400 | -0.54088900 |
| H  | 2.32164600  | -4.42865800 | -0.34241400 |
| H  | 2.74500600  | -3.08827500 | -2.40844100 |
| H  | 0.92757500  | -2.82241100 | -2.61618900 |
| C  | 3.03119900  | -1.90169100 | -0.02136500 |
| O  | 4.02189700  | -2.62752400 | -0.13083400 |
| N  | 3.09519700  | -0.70025300 | 0.65511000  |
| C  | 4.32543800  | -0.34319700 | 1.31061600  |
| C  | 5.49276700  | -0.09832900 | 0.58059200  |
| C  | 4.34375700  | -0.22702700 | 2.70470400  |
| C  | 6.66693600  | 0.26379800  | 1.24303300  |
| H  | 5.47898800  | -0.20543700 | -0.49771000 |
| C  | 5.51758100  | 0.14393000  | 3.36507900  |
| H  | 3.44104400  | -0.44179900 | 3.26952900  |
| C  | 6.68311800  | 0.39055300  | 2.63515200  |
| H  | 7.57092100  | 0.44709400  | 0.66920000  |
| H  | 5.52256700  | 0.22749300  | 4.44824200  |
| H  | 7.59838700  | 0.67364700  | 3.14711500  |
| Na | -2.63959100 | -1.83513200 | -1.32353800 |
| C  | -6.60129600 | 1.47524100  | 1.09041400  |
| C  | -6.22024200 | 0.15427800  | 0.80229200  |
| C  | -6.99994400 | -0.91971300 | 1.26845100  |
| C  | -8.14677900 | -0.66820800 | 2.01453100  |
| C  | -8.52218800 | 0.65242000  | 2.29960400  |
| C  | -7.75137300 | 1.72414100  | 1.83930300  |
| H  | -5.99219200 | 2.29937200  | 0.72755800  |
| H  | -6.68899900 | -1.93348500 | 1.03748900  |
| H  | -8.75164700 | -1.49349100 | 2.37760400  |
| H  | -9.41803000 | 0.84370900  | 2.88327900  |
| H  | -8.04622200 | 2.74439800  | 2.06413200  |
| C  | -5.00075200 | -0.07616600 | 0.01575400  |
| O  | -4.57406700 | -1.19268900 | -0.28083500 |
| H  | -4.45637700 | 0.82530200  | -0.32017500 |
| O  | -2.56295800 | -0.46849700 | -3.16725800 |
| H  | -1.64928000 | -0.12746100 | -3.11630500 |
| H  | -3.09295100 | 0.33482700  | -3.02682600 |
| O  | -0.40898300 | 1.10425700  | -2.14988400 |
| H  | 0.32848400  | 1.63700800  | -2.48004000 |
| H  | -0.01602900 | 0.59928200  | -1.38221200 |
| O  | -3.00331600 | 2.04515800  | -1.82388300 |
| H  | -2.03066200 | 1.89256700  | -1.82333800 |
| H  | -3.13300800 | 2.96845700  | -2.07156000 |

**TS3a**

|    |             |             |             |
|----|-------------|-------------|-------------|
| C  | 2.33632700  | -2.52518800 | -2.62300400 |
| C  | 1.74363600  | -1.36367900 | -2.11490300 |
| C  | 1.26147700  | -1.31509500 | -0.80172200 |
| C  | 1.38684800  | -2.45883800 | 0.00099400  |
| C  | 1.98808100  | -3.61645600 | -0.49363900 |
| C  | 2.46583600  | -3.65545300 | -1.81129000 |
| H  | 2.71236400  | -2.53899900 | -3.64221100 |
| H  | 1.67103600  | -0.48008900 | -2.74425500 |
| H  | 1.01162200  | -2.44576400 | 1.02008800  |
| H  | 2.08283000  | -4.48993500 | 0.14527800  |
| H  | 2.94614700  | -4.55249000 | -2.19221100 |
| C  | 0.63942300  | -0.02464500 | -0.25208600 |
| C  | -0.87539800 | -0.14066800 | 0.03277700  |
| H  | 0.75958100  | 0.73200500  | -1.03475200 |
| H  | -1.31148800 | -1.41286000 | -0.08263900 |
| C  | -1.32395600 | 0.07240500  | 1.39052100  |
| O  | -2.52916800 | 0.23485400  | 1.71219300  |
| C  | -0.31311500 | -0.05284600 | 2.48973800  |
| C  | -0.78402000 | 0.26606400  | 3.90636800  |
| C  | -0.55762000 | -1.15395400 | 3.54368800  |
| H  | -1.80727500 | 0.61719800  | 3.97244700  |
| H  | -0.04347300 | 0.74994700  | 4.53258800  |
| H  | 0.33494000  | -1.64386800 | 3.92069300  |
| H  | -1.41715300 | -1.79100400 | 3.35973900  |
| C  | 1.12074200  | 0.29015600  | 2.20614800  |
| O  | 1.93232000  | 0.44945400  | 3.11729500  |
| N  | 1.44864000  | 0.47952200  | 0.88373200  |
| C  | 2.76309100  | 0.96862500  | 0.55308000  |
| C  | 3.91424800  | 0.24041400  | 0.86811500  |
| C  | 2.87283900  | 2.19288800  | -0.11513600 |
| C  | 5.16917600  | 0.73676000  | 0.51021700  |
| H  | 3.82369400  | -0.69875700 | 1.40086500  |
| C  | 4.12959700  | 2.68201200  | -0.47923300 |
| H  | 1.97477900  | 2.76256300  | -0.33641500 |
| C  | 5.28098300  | 1.95421000  | -0.16755200 |
| H  | 6.06076300  | 0.16976200  | 0.76192700  |
| H  | 4.20746600  | 3.63486800  | -0.99485600 |
| H  | 6.25923900  | 2.33590500  | -0.44527500 |
| Na | -4.29692200 | -0.41388600 | 0.58959800  |
| C  | -1.34325000 | 2.58547000  | -2.43544100 |
| C  | -1.80129500 | 1.95100600  | -1.27161500 |
| C  | -2.36853300 | 2.74694900  | -0.26210800 |
| C  | -2.47006400 | 4.13064600  | -0.41808200 |
| C  | -2.00505800 | 4.75001400  | -1.58265000 |

|   |             |             |             |
|---|-------------|-------------|-------------|
| C | -1.43840900 | 3.97162200  | -2.59309500 |
| H | -0.91348700 | 1.98560300  | -3.23431500 |
| H | -2.71931400 | 2.28303800  | 0.65231100  |
| H | -2.90897900 | 4.72834900  | 0.37622300  |
| H | -2.08326000 | 5.82722000  | -1.69882600 |
| H | -1.07423400 | 4.43817500  | -3.50421000 |
| C | -1.68507400 | 0.43655900  | -1.16873800 |
| O | -2.99881600 | -0.14793500 | -1.27687500 |
| H | -1.12600900 | 0.11521500  | -2.05942500 |
| O | -2.10624100 | -2.41764800 | -0.38973000 |
| H | -1.66831300 | -3.12376800 | -0.89694900 |
| H | -2.81449000 | -1.12966100 | -1.23705500 |
| O | -0.86844600 | -4.49146200 | -2.09600900 |
| H | 0.08207100  | -4.30091900 | -2.07362100 |
| H | -1.13706700 | -4.39366500 | -3.01789900 |
| O | -4.45643900 | -2.63134900 | 0.62248000  |
| H | -3.50935000 | -2.75042000 | 0.26644000  |
| H | -4.69172700 | -3.41273800 | 1.13167500  |

**Int4a**

|   |             |             |             |
|---|-------------|-------------|-------------|
| C | 2.03880700  | -1.79410200 | -3.46042700 |
| C | 1.60350200  | -0.73037500 | -2.66007600 |
| C | 1.45518200  | -0.87880300 | -1.27665500 |
| C | 1.77768400  | -2.11985200 | -0.70153200 |
| C | 2.23368100  | -3.17731500 | -1.49176200 |
| C | 2.35718100  | -3.02137300 | -2.88001400 |
| H | 2.14428300  | -1.65381200 | -4.53256100 |
| H | 1.38823100  | 0.23098900  | -3.12071900 |
| H | 1.69031400  | -2.25372900 | 0.37302500  |
| H | 2.51851900  | -4.11624500 | -1.02255800 |
| H | 2.71618600  | -3.84278700 | -3.49336000 |
| C | 0.93283800  | 0.28757100  | -0.41837500 |
| C | -0.52479700 | 0.10502400  | -0.03512800 |
| H | 1.01435200  | 1.18615100  | -1.04218400 |
| H | -2.41445400 | -2.20062400 | 0.90342300  |
| C | -0.88283200 | -0.35394300 | 1.20617800  |
| O | -2.10840500 | -0.63897500 | 1.57649000  |
| C | 0.19418300  | -0.55684000 | 2.23964700  |
| C | -0.24346400 | -0.55293900 | 3.70335600  |
| C | 0.16666700  | -1.84167100 | 3.08301700  |
| H | -1.30346000 | -0.38593100 | 3.85610800  |
| H | 0.44852800  | -0.08510100 | 4.39454000  |
| H | 1.13375000  | -2.25265100 | 3.35590000  |
| H | -0.60819100 | -2.55830800 | 2.82919800  |

|             |             |             |             |
|-------------|-------------|-------------|-------------|
| C           | 1.56030800  | 0.02320700  | 2.00335200  |
| O           | 2.40352900  | 0.07067700  | 2.90019700  |
| N           | 1.81321600  | 0.52564900  | 0.74327800  |
| C           | 3.08732700  | 1.13534700  | 0.46937400  |
| C           | 4.28145300  | 0.42093600  | 0.61132800  |
| C           | 3.12298500  | 2.46453500  | 0.03338300  |
| C           | 5.49992600  | 1.03498600  | 0.31624600  |
| H           | 4.25252700  | -0.60281200 | 0.96490300  |
| C           | 4.34285100  | 3.07307100  | -0.27089100 |
| H           | 2.19547900  | 3.02329900  | -0.05406400 |
| C           | 5.53566800  | 2.35930700  | -0.12950300 |
| H           | 6.42336400  | 0.47526600  | 0.43422400  |
| H           | 4.35977400  | 4.10616800  | -0.60621600 |
| H           | 6.48575200  | 2.83259100  | -0.35993000 |
| Na          | -3.96643500 | -0.08139400 | 0.51699900  |
| C           | -3.06875500 | 2.30823900  | -1.94324900 |
| C           | -2.19828800 | 1.85450100  | -0.93521800 |
| C           | -1.99493200 | 2.66685900  | 0.18749300  |
| C           | -2.64628900 | 3.90125400  | 0.30461100  |
| C           | -3.50901400 | 4.34069300  | -0.70111900 |
| C           | -3.71842100 | 3.53843900  | -1.82900200 |
| H           | -3.23487700 | 1.68660700  | -2.81884400 |
| H           | -1.31827400 | 2.32854900  | 0.96588600  |
| H           | -2.47307200 | 4.51757000  | 1.18246800  |
| H           | -4.00973200 | 5.30065500  | -0.61266800 |
| H           | -4.38291200 | 3.87403600  | -2.62051800 |
| C           | -1.51160700 | 0.48992100  | -1.11248200 |
| O           | -2.61112200 | -0.44680700 | -1.31424100 |
| H           | -0.96671700 | 0.53584500  | -2.06677400 |
| O           | -2.78576700 | -2.86398500 | 0.26068300  |
| H           | -2.12899600 | -3.57080700 | 0.11220900  |
| H           | -2.32095700 | -1.34944900 | -1.08891000 |
| O           | -0.70168700 | -4.62048900 | -0.47637100 |
| H           | 0.00342800  | -4.05689200 | -0.83435000 |
| H           | -0.86306600 | -5.30008500 | -1.14273000 |
| O           | -5.28383000 | -1.94498900 | 0.52736000  |
| H           | -4.52420100 | -2.56606400 | 0.41262100  |
| H           | -5.94012800 | -2.39014900 | 1.07367400  |
| <b>TS4a</b> |             |             |             |
| C           | -1.95230400 | 2.96282600  | -2.34316700 |
| C           | -1.66796600 | 1.62238900  | -2.06104000 |
| C           | -1.39542500 | 1.20194100  | -0.75387900 |
| C           | -1.41940400 | 2.15648000  | 0.27443700  |

|    |             |             |             |
|----|-------------|-------------|-------------|
| C  | -1.70841100 | 3.49339700  | 0.00093300  |
| C  | -1.97417000 | 3.90413300  | -1.31135700 |
| H  | -2.16247700 | 3.26688200  | -3.36459900 |
| H  | -1.66473400 | 0.89503800  | -2.86917000 |
| H  | -1.21407400 | 1.85824800  | 1.29790300  |
| H  | -1.72211500 | 4.21737700  | 0.81064700  |
| H  | -2.20236900 | 4.94469500  | -1.52332900 |
| C  | -1.08101900 | -0.27563900 | -0.48238600 |
| C  | 0.36916000  | -0.54561000 | -0.07223300 |
| H  | -1.25929400 | -0.80340600 | -1.42258000 |
| H  | 3.36295600  | 4.50244600  | 0.89296800  |
| C  | 0.68962100  | -0.44823200 | 1.31258100  |
| O  | 1.85647500  | -0.21854200 | 1.74647500  |
| C  | -0.42206800 | -0.60834000 | 2.30033200  |
| C  | -0.03505000 | -1.21749400 | 3.65492800  |
| C  | -0.35661500 | 0.22711400  | 3.59269400  |
| H  | 1.00565300  | -1.50773800 | 3.74556100  |
| H  | -0.77834200 | -1.88387500 | 4.07774900  |
| H  | -1.31504400 | 0.55165600  | 3.98460200  |
| H  | 0.45933900  | 0.94144000  | 3.63778500  |
| C  | -1.80946300 | -0.95441700 | 1.82858600  |
| O  | -2.67923900 | -1.30692900 | 2.62529000  |
| N  | -2.04351700 | -0.86221100 | 0.47882000  |
| C  | -3.35276000 | -1.17912800 | -0.03032700 |
| C  | -4.46140300 | -0.39249100 | 0.29508200  |
| C  | -3.50180900 | -2.27794000 | -0.88245000 |
| C  | -5.71476100 | -0.70710500 | -0.23300100 |
| H  | -4.34022100 | 0.45107900  | 0.96519100  |
| C  | -4.75569100 | -2.58501000 | -1.41595000 |
| H  | -2.63836400 | -2.89581000 | -1.11257400 |
| C  | -5.86515600 | -1.79972400 | -1.09180000 |
| H  | -6.57431600 | -0.09583400 | 0.02615600  |
| H  | -4.86562100 | -3.44211300 | -2.07400200 |
| H  | -6.84165500 | -2.04027000 | -1.50192100 |
| Na | 3.10785200  | 1.44605300  | 0.62998000  |
| C  | 2.93062500  | -1.89639700 | -2.51952000 |
| C  | 2.48985200  | -1.58154800 | -1.21635700 |
| C  | 3.17330000  | -2.16907600 | -0.13545200 |
| C  | 4.25509800  | -3.02237800 | -0.35618800 |
| C  | 4.68707400  | -3.31090100 | -1.65383100 |
| C  | 4.01542400  | -2.74334700 | -2.73975200 |
| H  | 2.40630600  | -1.47076500 | -3.37197700 |
| H  | 2.86424400  | -1.95072000 | 0.87717400  |
| H  | 4.76589500  | -3.46256100 | 0.49558500  |

|   |            |             |             |
|---|------------|-------------|-------------|
| H | 5.53233300 | -3.97330300 | -1.81637200 |
| H | 4.33014900 | -2.96448700 | -3.75560400 |
| C | 1.28501600 | -0.72197600 | -1.12004900 |
| O | 2.31105200 | 1.09730600  | -1.44509700 |
| H | 0.81990400 | -0.61691400 | -2.09612300 |
| O | 2.82921200 | 3.71957600  | 0.72232700  |
| H | 2.34968400 | 3.86728600  | -0.14207500 |
| H | 2.91263200 | 0.88823400  | -2.17271400 |
| O | 1.62360400 | 3.60985000  | -1.62654600 |
| H | 1.80118700 | 2.61367200  | -1.67295700 |
| H | 0.66461600 | 3.72034400  | -1.67754200 |
| O | 4.28181700 | 0.66880300  | 2.52200000  |
| H | 3.47736500 | 0.15834600  | 2.72768500  |
| H | 4.63106300 | 1.01025600  | 3.35242300  |

### Int5a

|   |             |             |             |
|---|-------------|-------------|-------------|
| C | -1.19987300 | 3.18991400  | -2.27772700 |
| C | -1.24720600 | 1.87633900  | -1.80052300 |
| C | -2.33659500 | 1.44184700  | -1.03077200 |
| C | -3.37466300 | 2.34342800  | -0.75483800 |
| C | -3.32533200 | 3.65403900  | -1.23546600 |
| C | -2.23637900 | 4.08290500  | -1.99936400 |
| H | -0.34006300 | 3.50697400  | -2.86038000 |
| H | -0.41560300 | 1.21492200  | -2.02850500 |
| H | -4.22604800 | 2.02607700  | -0.16348300 |
| H | -4.13859000 | 4.33847200  | -1.01051300 |
| H | -2.19577700 | 5.10355900  | -2.36913500 |
| C | -2.41677100 | -0.02463900 | -0.56561100 |
| C | -1.05204700 | -0.64399700 | -0.29519800 |
| H | -2.89548100 | -0.59453000 | -1.36374600 |
| H | 5.76638500  | 3.17289000  | -1.85732700 |
| C | -0.39392500 | -0.03101000 | 0.88178100  |
| O | 0.82958500  | 0.08357800  | 1.00368100  |
| C | -2.79002300 | 0.16575700  | 1.87111500  |
| O | -3.48664500 | 0.21091600  | 2.88196200  |
| N | -3.27782000 | -0.19611000 | 0.63191600  |
| C | -4.61241500 | -0.70299700 | 0.47659400  |
| C | -5.71158000 | -0.05016000 | 1.05065700  |
| C | -4.81860600 | -1.87490800 | -0.26498000 |
| C | -6.99790500 | -0.56162000 | 0.86897200  |
| H | -5.55680500 | 0.83821300  | 1.64934300  |
| C | -6.10908600 | -2.37317300 | -0.45265200 |
| H | -3.97004900 | -2.41057700 | -0.67910100 |

|    |             |             |             |
|----|-------------|-------------|-------------|
| C  | -7.20526700 | -1.71827500 | 0.11337700  |
| H  | -7.84140500 | -0.04772900 | 1.32072400  |
| H  | -6.25226800 | -3.28202700 | -1.02981100 |
| H  | -8.20876800 | -2.10843700 | -0.02737600 |
| Na | 2.73146100  | 0.64325900  | -0.20025600 |
| C  | 0.82494300  | -3.22966100 | -2.29632600 |
| C  | 0.59840500  | -2.48778100 | -1.11733400 |
| C  | 1.47725000  | -2.68806400 | -0.03382000 |
| C  | 2.53769700  | -3.58549200 | -0.13705400 |
| C  | 2.75690700  | -4.29904900 | -1.32013700 |
| C  | 1.89427900  | -4.11655300 | -2.40354700 |
| H  | 0.15118000  | -3.10067200 | -3.13944600 |
| H  | 1.33833700  | -2.14107200 | 0.88849200  |
| H  | 3.20159100  | -3.71992300 | 0.71136900  |
| H  | 3.58995700  | -4.99200300 | -1.39479400 |
| H  | 2.04931900  | -4.66709700 | -3.32672600 |
| C  | -0.58160400 | -1.61489500 | -1.11632000 |
| O  | 1.89647600  | 0.86791400  | -2.47343800 |
| H  | -1.23540300 | -1.82788000 | -1.96292400 |
| O  | 5.44513100  | 2.76730100  | -1.04465400 |
| H  | 4.42503700  | 2.82284400  | -1.08148600 |
| H  | 2.36023100  | 0.70841300  | -3.30289400 |
| O  | 2.86897700  | 2.70176300  | -1.07260700 |
| H  | 2.25031800  | 1.76163100  | -2.08643700 |
| H  | 2.42405000  | 3.53843700  | -0.90271600 |
| C  | 6.64232000  | -1.27278800 | 2.07770900  |
| H  | 7.72918000  | -1.17922100 | 2.15403300  |
| H  | 6.37667800  | -2.28855900 | 1.77928000  |
| H  | 6.15798500  | -1.02134400 | 3.02463100  |
| S  | 6.02635400  | -0.14936200 | 0.77119800  |
| O  | 4.49599500  | -0.26621100 | 0.86144000  |
| C  | 6.47877200  | 1.42751800  | 1.56335400  |
| H  | 5.96315500  | 1.50027500  | 2.52469700  |
| H  | 7.56491900  | 1.45234300  | 1.69425600  |
| H  | 6.16352100  | 2.21041700  | 0.86673500  |
| C  | -1.31676500 | 0.49391400  | 1.92763100  |
| C  | -0.72338100 | 0.63699600  | 3.33634300  |
| C  | -0.94964700 | 1.86543100  | 2.55152700  |
| H  | 0.29496100  | 0.27647100  | 3.43341500  |
| H  | -1.41873800 | 0.40262400  | 4.13419000  |
| H  | -1.79975400 | 2.49265100  | 2.79852300  |
| H  | -0.10021300 | 2.36030300  | 2.09194200  |

**Int5a'**



|    |             |             |             |
|----|-------------|-------------|-------------|
| C  | -0.14371000 | 3.37181300  | -1.88542400 |
| C  | -0.25105900 | 2.01853000  | -1.55196800 |
| C  | -1.42037100 | 1.52680000  | -0.95199900 |
| C  | -2.47678600 | 2.41304900  | -0.69972500 |
| C  | -2.36726600 | 3.76451900  | -1.03635600 |
| C  | -1.19930500 | 4.24969100  | -1.63027300 |
| H  | 0.77542600  | 3.73100600  | -2.33853200 |
| H  | 0.59583800  | 1.36890200  | -1.75548200 |
| H  | -3.38963600 | 2.05259900  | -0.23958400 |
| H  | -3.19628800 | 4.43634100  | -0.83228300 |
| H  | -1.11287300 | 5.30134600  | -1.88803000 |
| C  | -1.55059800 | 0.02312800  | -0.64481800 |
| C  | -0.23763500 | -0.61331400 | -0.21543000 |
| H  | -1.88538400 | -0.47364600 | -1.55735200 |
| H  | 6.98921900  | 2.39984700  | -0.16024300 |
| C  | 0.22481600  | -0.09791000 | 1.09730000  |
| O  | 1.41531800  | 0.05243700  | 1.38949200  |
| C  | -0.85710700 | 0.27801600  | 2.04485100  |
| C  | -0.48878700 | 0.23125700  | 3.53762300  |
| C  | -0.62843300 | 1.55200600  | 2.89821500  |
| H  | 0.51283800  | -0.13133900 | 3.74230700  |
| H  | -1.29092600 | -0.11686100 | 4.17834500  |
| H  | -1.52473300 | 2.13129800  | 3.09310500  |
| H  | 0.26661000  | 2.11193500  | 2.64734000  |
| C  | -2.29581400 | -0.04909600 | 1.71695200  |
| O  | -3.14080700 | -0.12172900 | 2.60527500  |
| N  | -2.58136800 | -0.26687200 | 0.38368900  |
| C  | -3.87449600 | -0.73961700 | -0.02910000 |
| C  | -5.05106600 | -0.13298300 | 0.42978800  |
| C  | -3.95824700 | -1.82810000 | -0.90823100 |
| C  | -6.29176700 | -0.60511800 | -0.00224800 |
| H  | -4.99443400 | 0.68787400  | 1.13316300  |
| C  | -5.20217500 | -2.28708000 | -1.34532000 |
| H  | -3.05385700 | -2.33043300 | -1.23738800 |
| C  | -6.37485900 | -1.67689800 | -0.89453300 |
| H  | -7.19691600 | -0.12785600 | 0.36163800  |
| H  | -5.25111800 | -3.13135200 | -2.02672500 |
| H  | -7.34282800 | -2.03683600 | -1.22986900 |
| Na | 3.39261800  | 0.55431000  | 0.33135000  |
| C  | 2.32583400  | -2.75205100 | -1.89725300 |
| C  | 1.57337600  | -2.35729300 | -0.77393200 |
| C  | 1.95229000  | -2.84948900 | 0.48933600  |
| C  | 3.06101300  | -3.68283400 | 0.62274200  |

|   |             |             |             |
|---|-------------|-------------|-------------|
| C | 3.81744100  | -4.04054000 | -0.49851500 |
| C | 3.44459200  | -3.57323500 | -1.76099000 |
| H | 2.03513700  | -2.39556600 | -2.88182200 |
| H | 1.36861500  | -2.59620500 | 1.36665200  |
| H | 3.33301500  | -4.05923600 | 1.60444800  |
| H | 4.68420900  | -4.68523200 | -0.38858900 |
| H | 4.01992200  | -3.85187500 | -2.63878200 |
| C | 0.38841300  | -1.51622200 | -1.00296800 |
| O | 2.99858500  | 1.08593700  | -1.98007800 |
| H | -0.06595200 | -1.67345000 | -1.98205000 |
| O | 6.33910100  | 2.24359000  | 0.53391500  |
| H | 5.40887200  | 2.53373000  | 0.16473200  |
| H | 3.53816700  | 0.92581400  | -2.76207000 |
| O | 3.98913300  | 2.65888500  | -0.28896500 |
| H | 3.41206400  | 1.88740900  | -1.47869600 |
| H | 3.62755400  | 3.53525500  | -0.11971500 |
| O | 5.41345100  | -0.13233900 | 1.15132400  |
| H | 5.72879300  | -0.48645700 | 1.98925600  |
| H | 5.93143900  | 0.70723900  | 0.97152200  |

#### TS5a

|   |             |             |             |
|---|-------------|-------------|-------------|
| C | -1.52177400 | -0.67976200 | 3.90041800  |
| C | -1.55919500 | 0.21720500  | 2.82979300  |
| C | -1.42425600 | -0.23093500 | 1.50964300  |
| C | -1.26235300 | -1.60377000 | 1.27952100  |
| C | -1.22725200 | -2.50397400 | 2.34675500  |
| C | -1.35319400 | -2.04515500 | 3.66149100  |
| H | -1.63223700 | -0.31221200 | 4.91656900  |
| H | -1.70315600 | 1.27727400  | 3.02536300  |
| H | -1.16506500 | -1.97826300 | 0.26587800  |
| H | -1.10388100 | -3.56499200 | 2.14862000  |
| H | -1.32620700 | -2.74677900 | 4.48996900  |
| C | -1.44142400 | 0.79658200  | 0.36805800  |
| C | -0.02910200 | 1.15495700  | -0.10146100 |
| H | -1.88223800 | 1.70882600  | 0.77525300  |
| H | 2.42600700  | -5.17731300 | -0.58812300 |
| C | 0.54868800  | 0.19916400  | -1.08517500 |
| O | 1.78154300  | -0.09228500 | -1.10829000 |
| C | -0.36745400 | -0.34182200 | -2.00293200 |
| C | 1.07731900  | -1.87859100 | -2.71385300 |
| C | 0.16306200  | -0.94388100 | -3.30897900 |
| H | 0.70497700  | -2.70907200 | -2.11896800 |
| H | 2.15610900  | -1.79814800 | -2.79564600 |

|              |             |             |             |
|--------------|-------------|-------------|-------------|
| H            | 0.61428600  | -0.21886900 | -3.98996000 |
| H            | -0.73513600 | -1.40338600 | -3.74737800 |
| C            | -1.83076500 | -0.28373500 | -1.86476500 |
| O            | -2.58315800 | -0.77038000 | -2.71703900 |
| N            | -2.31365700 | 0.37710900  | -0.74815400 |
| C            | -3.73081200 | 0.52670800  | -0.56318500 |
| C            | -4.56698100 | -0.59015700 | -0.46110600 |
| C            | -4.27381600 | 1.81308300  | -0.46444100 |
| C            | -5.93687000 | -0.41637200 | -0.25789500 |
| H            | -4.14508700 | -1.58401300 | -0.55257600 |
| C            | -5.64325000 | 1.98248400  | -0.24899000 |
| H            | -3.62568800 | 2.67823700  | -0.57242800 |
| C            | -6.47864900 | 0.86739000  | -0.14590700 |
| H            | -6.58105200 | -1.28759000 | -0.18330800 |
| H            | -6.05637500 | 2.98432200  | -0.17555300 |
| H            | -7.54470400 | 0.99765200  | 0.01547300  |
| Na           | 3.36640900  | -1.18434200 | 0.04716800  |
| C            | 2.42504300  | 3.62356700  | 1.29526000  |
| C            | 1.90354800  | 2.84204800  | 0.24369700  |
| C            | 2.64665600  | 2.76146000  | -0.95005900 |
| C            | 3.87272200  | 3.41433600  | -1.07003700 |
| C            | 4.38991300  | 4.15977700  | -0.00533900 |
| C            | 3.65857400  | 4.26313100  | 1.18074500  |
| H            | 1.85669400  | 3.71697500  | 2.21732100  |
| H            | 2.26296400  | 2.19291600  | -1.78678800 |
| H            | 4.42544700  | 3.34473100  | -2.00270500 |
| H            | 5.34705300  | 4.66351000  | -0.10405000 |
| H            | 4.04378000  | 4.84594300  | 2.01230700  |
| C            | 0.58443000  | 2.22695200  | 0.45166000  |
| O            | 4.48677300  | -1.58743500 | 2.03690700  |
| H            | -0.00371300 | 2.75154200  | 1.20533300  |
| O            | 2.30358200  | -4.23571700 | -0.75433900 |
| H            | 2.29264600  | -3.72250900 | 0.20249300  |
| H            | 5.23525800  | -2.01518700 | 2.46399100  |
| O            | 2.41073500  | -2.86433900 | 1.28554200  |
| H            | 3.71725800  | -2.24717400 | 1.98886700  |
| H            | 1.59751900  | -2.79247700 | 1.79837100  |
| O            | 4.07375700  | -2.56798200 | -1.71485300 |
| H            | 3.51057700  | -3.35507000 | -1.43898900 |
| H            | 4.95637100  | -2.89989300 | -1.91202900 |
| <b>TS5a'</b> |             |             |             |
| C            | 2.75327600  | -0.09131500 | -3.88490300 |
| C            | 2.85562700  | 0.49453100  | -2.62044600 |

|    |             |             |             |
|----|-------------|-------------|-------------|
| C  | 2.28611000  | -0.11538200 | -1.49538600 |
| C  | 1.61704500  | -1.33610000 | -1.65912700 |
| C  | 1.51501300  | -1.92558400 | -2.92096500 |
| C  | 2.07958700  | -1.30452800 | -4.03912200 |
| H  | 3.20594900  | 0.39590200  | -4.74381900 |
| H  | 3.39262000  | 1.43355900  | -2.50778800 |
| H  | 1.17048200  | -1.83368200 | -0.80472500 |
| H  | 0.99381000  | -2.87268500 | -3.02796500 |
| H  | 1.99888900  | -1.76531100 | -5.01927000 |
| C  | 2.40333900  | 0.58159300  | -0.13174900 |
| C  | 1.12169100  | 1.32731600  | 0.24672600  |
| H  | 3.18964500  | 1.33252300  | -0.23261000 |
| H  | -2.07129800 | -4.35638800 | -0.97162000 |
| C  | 0.07636600  | 0.46191100  | 0.85846500  |
| O  | -1.16030500 | 0.63302900  | 0.64309100  |
| C  | 0.56036600  | -0.54226400 | 1.71361700  |
| C  | -1.41413700 | -1.57059300 | 1.81722700  |
| C  | -0.39368700 | -1.15997500 | 2.74229100  |
| H  | -1.22265600 | -2.35415100 | 1.08374700  |
| H  | -2.40237400 | -1.12003500 | 1.78766300  |
| H  | -0.71871300 | -0.46943400 | 3.52393600  |
| H  | 0.19941600  | -1.98810600 | 3.15702400  |
| C  | 1.96008200  | -0.98771100 | 1.77830400  |
| O  | 2.32738800  | -1.86789900 | 2.56594000  |
| N  | 2.84728900  | -0.34321000 | 0.93209500  |
| C  | 4.24145100  | -0.68686700 | 0.96056800  |
| C  | 4.66909200  | -1.99062100 | 0.68682000  |
| C  | 5.18440400  | 0.30672300  | 1.24901300  |
| C  | 6.03167200  | -2.29241800 | 0.69876700  |
| H  | 3.93564300  | -2.76068700 | 0.47883700  |
| C  | 6.54767900  | 0.00355000  | 1.24788800  |
| H  | 4.84776900  | 1.31121900  | 1.48958400  |
| C  | 6.97505600  | -1.29797200 | 0.97336100  |
| H  | 6.35618600  | -3.30747600 | 0.48892700  |
| H  | 7.27170900  | 0.78088400  | 1.47456300  |
| H  | 8.03453900  | -1.53680100 | 0.97786400  |
| Na | -2.82337500 | 0.17389100  | -0.79986900 |
| C  | 0.09128100  | 4.84161300  | -0.61465500 |
| C  | -0.00699900 | 3.66395300  | 0.15623400  |
| C  | -1.04771800 | 3.58294300  | 1.10277400  |
| C  | -1.95910200 | 4.62785400  | 1.24872700  |
| C  | -1.86169200 | 5.77676600  | 0.45700300  |
| C  | -0.82878800 | 5.87990000  | -0.47823300 |
| H  | 0.89907800  | 4.93477200  | -1.33643000 |

|   |             |             |             |
|---|-------------|-------------|-------------|
| H | -1.14737200 | 2.70153000  | 1.72111600  |
| H | -2.75091100 | 4.54415700  | 1.98788300  |
| H | -2.57775400 | 6.58503700  | 0.57407000  |
| H | -0.73512200 | 6.76890100  | -1.09520500 |
| C | 1.03198600  | 2.64509500  | -0.05105100 |
| O | -3.88011800 | 0.18955200  | -2.87780100 |
| H | 1.91344800  | 3.05601400  | -0.54427200 |
| O | -2.26771100 | -3.53802600 | -0.50140900 |
| H | -2.24909800 | -2.78138600 | -1.21495200 |
| H | -4.63459700 | -0.00551600 | -3.44161700 |
| O | -2.23627700 | -1.58032700 | -2.12808000 |
| H | -3.28567200 | -0.64299200 | -2.81469500 |
| H | -1.40311900 | -1.55815900 | -2.61438900 |
| C | -6.93588400 | -1.10534700 | 1.33646300  |
| H | -7.74197500 | -1.82298600 | 1.16018000  |
| H | -7.26153800 | -0.10196500 | 1.05611400  |
| H | -6.61765000 | -1.11837600 | 2.38191500  |
| S | -5.50993400 | -1.52487100 | 0.27308000  |
| O | -4.38202200 | -0.58097700 | 0.73122300  |
| C | -5.11947200 | -3.15665300 | 0.98136700  |
| H | -5.00775700 | -3.06380700 | 2.06526200  |
| H | -5.92739300 | -3.85015700 | 0.72939300  |
| H | -4.17864900 | -3.47210100 | 0.51230900  |

2

|   |             |             |             |
|---|-------------|-------------|-------------|
| C | -5.97747200 | 0.53322200  | -0.08823700 |
| C | -4.78910400 | -0.02209800 | -0.56333800 |
| C | -3.68837300 | 0.79219300  | -0.89301200 |
| C | -3.82288900 | 2.18840300  | -0.74720500 |
| C | -5.01129800 | 2.74230900  | -0.27798900 |
| C | -6.09263100 | 1.91774100  | 0.05726300  |
| H | -6.81218800 | -0.11378300 | 0.16469000  |
| H | -4.70195500 | -1.09943300 | -0.67603200 |
| H | -3.00221300 | 2.84355000  | -1.02249400 |
| H | -5.10108700 | 3.82063600  | -0.18170400 |
| H | -7.01856000 | 2.35405800  | 0.42035800  |
| C | -2.46291200 | 0.14852400  | -1.37540100 |
| C | -1.26624800 | 0.74322900  | -1.57262200 |
| H | -2.56227500 | -0.91401900 | -1.58687400 |
| H | -1.11759800 | 1.80267400  | -1.38135700 |
| C | -0.07606500 | 0.08779900  | -2.14339900 |
| O | 0.84080100  | 0.80151700  | -2.57493700 |
| C | -0.02398300 | -1.40965200 | -2.30546800 |
| C | -0.26816700 | -1.88642600 | -3.73718000 |

|    |             |             |             |
|----|-------------|-------------|-------------|
| C  | 1.10551000  | -1.97249200 | -3.15457100 |
| H  | -0.45937200 | -1.11823800 | -4.48027300 |
| H  | -0.86162800 | -2.79083400 | -3.82130700 |
| H  | 1.47562000  | -2.95247900 | -2.86903700 |
| H  | 1.85308100  | -1.25843000 | -3.48330300 |
| C  | -0.53305000 | -2.33330800 | -1.19935500 |
| O  | -1.30970000 | -3.25829700 | -1.46150900 |
| N  | -0.02021500 | -2.07099200 | 0.03318300  |
| H  | 0.65936400  | -1.26696700 | 0.12806600  |
| C  | -0.28819000 | -2.76025100 | 1.23545600  |
| C  | 0.40521800  | -2.31983200 | 2.38102100  |
| C  | -1.18641100 | -3.83723000 | 1.35192100  |
| C  | 0.20012700  | -2.93736700 | 3.61262400  |
| H  | 1.10258000  | -1.49368300 | 2.27889200  |
| C  | -1.37903100 | -4.44412500 | 2.59654400  |
| H  | -1.71214300 | -4.19048900 | 0.47667000  |
| C  | -0.69574700 | -4.00539300 | 3.73235400  |
| H  | 0.74654100  | -2.58362700 | 4.48324400  |
| H  | -2.07443900 | -5.27611900 | 2.67024400  |
| H  | -0.85397800 | -4.48801800 | 4.69241000  |
| Na | 2.14847100  | 1.64312700  | -0.84050200 |
| H  | 1.66000200  | -0.05775100 | 0.43254900  |
| C  | 4.62342300  | -1.14018600 | -0.93244800 |
| H  | 5.20104700  | -1.95343900 | -0.48339500 |
| H  | 4.70769300  | -1.18153800 | -2.02012600 |
| H  | 3.57523000  | -1.16823600 | -0.61598000 |
| S  | 5.34210100  | 0.45801400  | -0.40512200 |
| O  | 4.42427100  | 1.55305300  | -0.97002200 |
| C  | 4.92488900  | 0.30880100  | 1.37038100  |
| H  | 3.84331100  | 0.15397300  | 1.45416900  |
| H  | 5.48697900  | -0.52584600 | 1.79944600  |
| H  | 5.22724200  | 1.24386700  | 1.84625100  |
| C  | -0.40016400 | 1.93175600  | 2.17226400  |
| H  | -0.54300900 | 1.85127100  | 3.25374800  |
| H  | -0.02450700 | 0.99022300  | 1.76061700  |
| H  | -1.32445300 | 2.23268900  | 1.67278300  |
| S  | 0.90855600  | 3.15470000  | 1.83208700  |
| O  | 0.99804300  | 3.28596200  | 0.30252300  |
| C  | 0.02138000  | 4.65253500  | 2.38664700  |
| H  | -0.90403800 | 4.75301700  | 1.81422700  |
| H  | -0.18396500 | 4.57566800  | 3.45800600  |
| H  | 0.67633500  | 5.50360500  | 2.19135600  |

TS1e

|    |             |             |             |
|----|-------------|-------------|-------------|
| C  | 6.85764300  | -0.20077200 | -0.16854800 |
| C  | 5.54478600  | -0.31009700 | -0.62721600 |
| C  | 4.59072600  | -1.06915300 | 0.07887000  |
| C  | 4.99885700  | -1.72820300 | 1.25674300  |
| C  | 6.31043100  | -1.62255200 | 1.71140900  |
| C  | 7.24479000  | -0.85658100 | 1.00257900  |
| H  | 7.57650300  | 0.39361100  | -0.72473700 |
| H  | 5.24130200  | 0.20154500  | -1.53651900 |
| H  | 4.29079400  | -2.33529900 | 1.81205200  |
| H  | 6.60967500  | -2.14082100 | 2.61790300  |
| H  | 8.26708800  | -0.77719200 | 1.36076800  |
| C  | 3.22874200  | -1.13450000 | -0.45460200 |
| C  | 2.14741400  | -1.68201400 | 0.14809400  |
| H  | 3.09344700  | -0.66762500 | -1.42822100 |
| H  | 2.21006500  | -2.14885100 | 1.12790000  |
| C  | 0.80377700  | -1.74124300 | -0.44274300 |
| O  | -0.08262700 | -2.36549400 | 0.15952300  |
| C  | 0.53031100  | -1.07849600 | -1.77547500 |
| C  | 0.88896800  | -1.88384400 | -3.01018100 |
| C  | -0.55588600 | -1.65973100 | -2.64800900 |
| H  | 1.30150800  | -2.87808300 | -2.86182000 |
| H  | 1.32448900  | -1.32254700 | -3.83108200 |
| H  | -1.12927900 | -0.95883700 | -3.24653000 |
| H  | -1.12450300 | -2.49583100 | -2.25207000 |
| C  | 0.77553100  | 0.44337200  | -1.83682800 |
| O  | 1.75091700  | 0.87846100  | -2.47183900 |
| N  | -0.14446200 | 1.16017600  | -1.15565700 |
| H  | -1.19019900 | 0.59215300  | -0.73770700 |
| C  | -0.13030000 | 2.56149300  | -1.02375900 |
| C  | -1.29583900 | 3.16205500  | -0.49584800 |
| C  | 0.96348600  | 3.39610400  | -1.34004300 |
| C  | -1.36240800 | 4.53807300  | -0.28461700 |
| H  | -2.14592800 | 2.53094600  | -0.26060000 |
| C  | 0.88159100  | 4.77365000  | -1.12082500 |
| H  | 1.85480600  | 2.95868800  | -1.76674900 |
| C  | -0.27249600 | 5.35879700  | -0.59369200 |
| H  | -2.27473200 | 4.97200400  | 0.11769800  |
| H  | 1.73607000  | 5.39626800  | -1.37447500 |
| H  | -0.32549700 | 6.43203400  | -0.43452200 |
| Na | -2.21676900 | -1.74168900 | 0.69103800  |
| H  | -2.11682800 | 0.16813000  | -0.36084500 |
| C  | -4.50127500 | -1.08199000 | -2.38881900 |
| H  | -5.23167200 | -0.45154600 | -2.90399100 |
| H  | -4.20949400 | -1.91328500 | -3.03343500 |

|   |             |             |             |
|---|-------------|-------------|-------------|
| H | -3.62513500 | -0.50820600 | -2.07029500 |
| S | -5.28448400 | -1.81043700 | -0.90496900 |
| O | -4.17129900 | -2.55026300 | -0.15005200 |
| C | -5.55851400 | -0.24030900 | -0.00422800 |
| H | -4.60254100 | 0.28396300  | 0.08566600  |
| H | -6.29301700 | 0.35949900  | -0.54924600 |
| H | -5.95046700 | -0.50438200 | 0.97984900  |
| C | -0.26081600 | 1.04337900  | 2.60444100  |
| H | -0.03805900 | 2.06843300  | 2.91273200  |
| H | -0.21044400 | 0.97194000  | 1.51677900  |
| H | 0.42179800  | 0.32870800  | 3.07124200  |
| S | -1.97174800 | 0.63315900  | 3.08831800  |
| O | -2.16646700 | -0.86298300 | 2.79706000  |
| C | -1.74201400 | 0.72853700  | 4.89910600  |
| H | -0.95623300 | 0.02976000  | 5.19667500  |
| H | -1.48703700 | 1.75430100  | 5.17917700  |
| H | -2.69027600 | 0.44068500  | 5.35660200  |

**Int1e**

|   |             |             |             |
|---|-------------|-------------|-------------|
| C | 6.93038300  | 0.95470000  | -0.06090000 |
| C | 5.61471300  | 0.85548200  | -0.51362500 |
| C | 4.86345000  | -0.31819700 | -0.30643500 |
| C | 5.47884600  | -1.39722000 | 0.36086200  |
| C | 6.79368200  | -1.29962000 | 0.80759200  |
| C | 7.52446900  | -0.12252500 | 0.60101700  |
| H | 7.49042300  | 1.87047300  | -0.22549500 |
| H | 5.15009400  | 1.69391100  | -1.02521400 |
| H | 4.92998500  | -2.32025900 | 0.51989600  |
| H | 7.25441200  | -2.14217100 | 1.31532900  |
| H | 8.54996900  | -0.05014100 | 0.95147800  |
| C | 3.48730100  | -0.35392700 | -0.80321200 |
| C | 2.55866300  | -1.31095500 | -0.56751400 |
| H | 3.18758000  | 0.51046300  | -1.39367100 |
| H | 2.76896900  | -2.17870200 | 0.05344700  |
| C | 1.18101300  | -1.24273500 | -1.06851100 |
| O | 0.34529300  | -2.08459600 | -0.68469400 |
| C | 0.78557000  | -0.12614000 | -1.99639600 |
| C | 1.31102300  | -0.10558800 | -3.40469100 |
| C | -0.14527500 | -0.42758100 | -3.15340800 |
| H | 1.95819700  | -0.91749100 | -3.72643000 |
| H | 1.56739300  | 0.87417900  | -3.79685100 |
| H | -0.88720800 | 0.32532600  | -3.40405200 |
| H | -0.47503500 | -1.45420500 | -3.29623400 |



|    |             |             |             |
|----|-------------|-------------|-------------|
| C  | 0.61442400  | 1.23223000  | -1.24841400 |
| O  | 1.38079700  | 2.16720800  | -1.56178800 |
| N  | -0.36624300 | 1.16035500  | -0.33827200 |
| C  | -0.71529300 | 2.25226500  | 0.46515800  |
| C  | -1.76741800 | 2.04104100  | 1.39172900  |
| C  | -0.12772700 | 3.54275100  | 0.44490400  |
| C  | -2.20954000 | 3.04812100  | 2.24785600  |
| H  | -2.23021400 | 1.05829500  | 1.43355500  |
| C  | -0.57925900 | 4.54443300  | 1.30777300  |
| H  | 0.67393500  | 3.73786300  | -0.25368100 |
| C  | -1.61794700 | 4.31612400  | 2.21517100  |
| H  | -3.01960200 | 2.84217800  | 2.94459300  |
| H  | -0.10743600 | 5.52363900  | 1.26521700  |
| H  | -1.95916100 | 5.10511100  | 2.87945400  |
| Na | -1.68989100 | -0.81544100 | -0.56614000 |
| C  | -6.01901400 | 0.27173800  | -2.18537000 |
| H  | -7.05314200 | 0.34739900  | -1.83789400 |
| H  | -5.99701700 | -0.06903800 | -3.22205600 |
| H  | -5.49914000 | 1.22853700  | -2.09339600 |
| S  | -5.13703100 | -0.98356200 | -1.19164800 |
| O  | -3.67402500 | -0.90075700 | -1.64189300 |
| C  | -5.23397600 | -0.13465600 | 0.42307300  |
| H  | -4.84541800 | 0.88251400  | 0.32437200  |
| H  | -6.27515100 | -0.12916200 | 0.75858300  |
| H  | -4.60841700 | -0.70872100 | 1.11166800  |
| C  | -0.20345900 | -1.08192100 | 2.89829600  |
| H  | 0.42514200  | -1.49712800 | 3.69109700  |
| H  | -0.56649900 | -0.09343200 | 3.18485700  |
| H  | 0.33727700  | -1.01667400 | 1.95213500  |
| S  | -1.66628100 | -2.15826700 | 2.69497300  |
| O  | -2.45120400 | -1.61083000 | 1.48835100  |
| C  | -0.79659100 | -3.64909000 | 2.09247400  |
| H  | -0.23058100 | -3.39354900 | 1.19206400  |
| H  | -0.14411300 | -4.02160300 | 2.88745900  |
| H  | -1.56486100 | -4.39156100 | 1.86763000  |

**TS2e**

|   |             |            |             |
|---|-------------|------------|-------------|
| C | -5.01931000 | 1.47889700 | 1.10669900  |
| C | -3.73632700 | 1.38207800 | 0.56864800  |
| C | -3.54034600 | 0.89643200 | -0.73502000 |
| C | -4.66383800 | 0.49518900 | -1.47642900 |
| C | -5.94986900 | 0.60077100 | -0.94484900 |
| C | -6.13078300 | 1.09319000 | 0.35054200  |
| H | -5.15288000 | 1.84835500 | 2.11945700  |

|    |             |             |             |
|----|-------------|-------------|-------------|
| H  | -2.87644100 | 1.66779000  | 1.16593500  |
| H  | -4.52482200 | 0.10606500  | -2.48202000 |
| H  | -6.80768700 | 0.29592300  | -1.53758600 |
| H  | -7.12960200 | 1.16965800  | 0.77079500  |
| C  | -2.19238300 | 0.80101400  | -1.34212200 |
| C  | -1.21492900 | 1.81485400  | -1.10571600 |
| H  | -2.21381300 | 0.35680000  | -2.33164900 |
| H  | -1.43599100 | 2.65067700  | -0.45016400 |
| C  | 0.10583600  | 1.56397400  | -1.49899300 |
| O  | 1.14046000  | 2.26011900  | -1.24656400 |
| C  | 0.30161000  | 0.16501500  | -2.08095600 |
| C  | 0.03802300  | -0.12417500 | -3.54395700 |
| C  | 1.45139400  | -0.11528100 | -3.00967800 |
| H  | -0.27869400 | 0.70515600  | -4.17102000 |
| H  | -0.40529800 | -1.08329200 | -3.79902800 |
| H  | 1.96282000  | -1.06760100 | -2.91087900 |
| H  | 2.08571200  | 0.72543600  | -3.27853500 |
| C  | -0.07263800 | -0.85627100 | -1.00155900 |
| O  | 0.86378400  | -1.51189800 | -0.46397900 |
| N  | -1.36244700 | -0.87365500 | -0.67743200 |
| C  | -1.86065700 | -1.56163400 | 0.44271900  |
| C  | -1.29926400 | -1.40717500 | 1.72500300  |
| C  | -2.99973900 | -2.37221400 | 0.29941800  |
| C  | -1.86318600 | -2.05314500 | 2.82581500  |
| H  | -0.41755400 | -0.78747100 | 1.84656700  |
| C  | -3.56157900 | -3.01297200 | 1.40438400  |
| H  | -3.43576900 | -2.49068400 | -0.68755400 |
| C  | -2.99659000 | -2.85876900 | 2.67411200  |
| H  | -1.41592900 | -1.92434800 | 3.80826200  |
| H  | -4.44316100 | -3.63454600 | 1.27276400  |
| H  | -3.43379200 | -3.35834000 | 3.53384000  |
| Na | 2.53148700  | 0.38199100  | -0.39826600 |
| C  | 3.39745700  | -3.58675200 | -0.99550400 |
| H  | 3.38483000  | -4.57687100 | -0.53071800 |
| H  | 3.87824800  | -3.64428000 | -1.97413700 |
| H  | 2.39147700  | -3.16505900 | -1.07157700 |
| S  | 4.41613500  | -2.46574800 | 0.02935300  |
| O  | 4.26825400  | -1.06684600 | -0.58757600 |
| C  | 3.35791900  | -2.49327500 | 1.52281100  |
| H  | 2.32548700  | -2.27153100 | 1.23953800  |
| H  | 3.43673300  | -3.48000600 | 1.98841000  |
| H  | 3.75166700  | -1.73053600 | 2.19788500  |
| C  | 1.18174500  | 3.51596700  | 1.81685900  |
| H  | 1.11212000  | 4.59147300  | 2.00470700  |

|   |            |            |             |
|---|------------|------------|-------------|
| H | 0.67133700 | 2.96803000 | 2.61132800  |
| H | 0.78725500 | 3.25112600 | 0.83128400  |
| S | 2.94014000 | 3.02209500 | 1.87932200  |
| O | 2.98548200 | 1.53222800 | 1.50666300  |
| C | 3.48614500 | 3.94170300 | 0.39436000  |
| H | 2.85800100 | 3.64946000 | -0.45128600 |
| H | 3.40913000 | 5.01399100 | 0.59644200  |
| H | 4.53101200 | 3.67339700 | 0.22520700  |

**Int2e**

|   |             |             |             |
|---|-------------|-------------|-------------|
| C | 2.60867100  | 2.62472800  | -2.64788700 |
| C | 1.88696000  | 1.94827000  | -1.66428900 |
| C | 2.17336600  | 2.13833400  | -0.30458100 |
| C | 3.18964300  | 3.03259000  | 0.04578700  |
| C | 3.91251800  | 3.72009700  | -0.93552200 |
| C | 3.62655900  | 3.51517400  | -2.28611900 |
| H | 2.37389900  | 2.46586300  | -3.69724800 |
| H | 1.08178400  | 1.27346600  | -1.94115300 |
| H | 3.42053000  | 3.19193900  | 1.09626100  |
| H | 4.69782100  | 4.41153600  | -0.64275300 |
| H | 4.18608400  | 4.04622900  | -3.05115200 |
| C | 1.36671400  | 1.41492800  | 0.77341800  |
| C | -0.11049900 | 1.62184700  | 0.56178900  |
| H | 1.70482700  | 1.82307900  | 1.74320100  |
| H | -0.41349200 | 2.54636200  | 0.08133200  |
| C | -1.05475900 | 0.73495400  | 0.98514200  |
| O | -2.34671100 | 0.84642300  | 0.83658200  |
| C | -0.53189600 | -0.51539700 | 1.67103600  |
| C | -0.81861200 | -0.68505100 | 3.17193100  |
| C | -1.50262700 | -1.55876200 | 2.16569400  |
| H | -1.38637200 | 0.11493100  | 3.63818500  |
| H | -0.03659400 | -1.12572900 | 3.78375600  |
| H | -1.18512600 | -2.59325300 | 2.10598900  |
| H | -2.55034600 | -1.35623900 | 1.97016700  |
| C | 0.82261700  | -0.99986100 | 1.23649000  |
| O | 1.13591000  | -2.19881000 | 1.29152100  |
| N | 1.71059400  | -0.04881700 | 0.79435500  |
| C | 3.10522200  | -0.41498400 | 0.76830500  |
| C | 3.72759400  | -0.78790000 | -0.42521200 |
| C | 3.84711900  | -0.38082300 | 1.95385600  |
| C | 5.08307900  | -1.12430600 | -0.43390700 |
| H | 3.14993600  | -0.80295300 | -1.34283700 |
| C | 5.20312300  | -0.71422400 | 1.94488400  |
| H | 3.35507400  | -0.10218600 | 2.88113600  |

|    |             |             |             |
|----|-------------|-------------|-------------|
| C  | 5.82459400  | -1.08714400 | 0.74994400  |
| H  | 5.56037800  | -1.41103200 | -1.36671700 |
| H  | 5.77114200  | -0.68699900 | 2.87046800  |
| H  | 6.87912300  | -1.34745900 | 0.74147800  |
| Na | -3.13194900 | -0.51594900 | -0.72010900 |
| C  | -0.73670000 | -4.33638700 | -0.58018200 |
| H  | -0.07414800 | -5.15329100 | -0.88139600 |
| H  | -1.67077500 | -4.74682700 | -0.19131700 |
| H  | -0.24755000 | -3.68894400 | 0.15421100  |
| S  | -1.16973900 | -3.38025200 | -2.07493500 |
| O  | -2.09247000 | -2.24055100 | -1.62194000 |
| C  | 0.47165100  | -2.63020600 | -2.35915200 |
| H  | 0.80339500  | -2.12100700 | -1.45223900 |
| H  | 1.17237200  | -3.42301100 | -2.63589100 |
| H  | 0.35997300  | -1.92781100 | -3.18721700 |
| C  | -4.51998400 | 2.91614800  | -0.33766500 |
| H  | -4.83042700 | 3.78505600  | 0.25020000  |
| H  | -4.53646900 | 3.16657400  | -1.40054600 |
| H  | -3.53822500 | 2.54282400  | -0.02199000 |
| S  | -5.74124900 | 1.57848400  | -0.09395000 |
| O  | -5.19975400 | 0.35507600  | -0.85956200 |
| C  | -5.39682300 | 1.27270100  | 1.67587000  |
| H  | -4.32598300 | 1.07094600  | 1.79129300  |
| H  | -5.70434300 | 2.15370600  | 2.24705300  |
| H  | -6.00438300 | 0.41422100  | 1.97001500  |

**Int3e**

|   |             |             |             |
|---|-------------|-------------|-------------|
| C | -3.63473300 | 2.52130200  | 1.48626600  |
| C | -3.04358100 | 1.34114300  | 1.03600900  |
| C | -3.30809800 | 0.85097500  | -0.25230200 |
| C | -4.16842700 | 1.57960400  | -1.08015700 |
| C | -4.75416000 | 2.77300600  | -0.63950900 |
| C | -4.49226800 | 3.24578000  | 0.64713100  |
| H | -3.42687700 | 2.87981600  | 2.49105900  |
| H | -2.36870600 | 0.79089800  | 1.68628900  |
| H | -4.39236200 | 1.20587200  | -2.07693300 |
| H | -5.42265300 | 3.32192800  | -1.29749700 |
| H | -4.95511500 | 4.16370500  | 0.99901100  |
| C | -2.65015600 | -0.44495400 | -0.75711600 |
| C | -1.16128800 | -0.30707800 | -0.91273700 |
| H | -3.09384100 | -0.64306800 | -1.74246200 |
| H | -0.83273100 | 0.35636900  | -1.70877100 |
| C | -0.23649100 | -0.88973800 | -0.09469800 |
| O | 1.05554400  | -0.73521500 | -0.19938400 |

|    |             |             |             |
|----|-------------|-------------|-------------|
| C  | -2.19137500 | -2.20383800 | 1.00646700  |
| O  | -2.60580300 | -3.07493500 | 1.77579800  |
| N  | -3.03025200 | -1.59138200 | 0.10050500  |
| C  | -4.40611700 | -2.00530400 | 0.04488700  |
| C  | -5.26632700 | -1.80333200 | 1.12899600  |
| C  | -4.89357600 | -2.60072900 | -1.12340200 |
| C  | -6.60392600 | -2.19178000 | 1.04033600  |
| H  | -4.88069400 | -1.35456400 | 2.03715000  |
| C  | -6.23500800 | -2.98072800 | -1.21357800 |
| H  | -4.21627500 | -2.77570400 | -1.95451100 |
| C  | -7.09429600 | -2.77696200 | -0.13094700 |
| H  | -7.26466900 | -2.03487300 | 1.88823200  |
| H  | -6.60352300 | -3.44477400 | -2.12423600 |
| H  | -8.13654700 | -3.07592200 | -0.19724600 |
| Na | 3.11478300  | -0.13691000 | 0.16988800  |
| C  | 7.14967100  | -1.41089100 | 2.66373900  |
| H  | 8.04661300  | -2.01246600 | 2.49219900  |
| H  | 6.64998100  | -1.73688000 | 3.57771100  |
| H  | 7.39176500  | -0.34723800 | 2.72895000  |
| S  | 5.97161100  | -1.67031100 | 1.29090700  |
| O  | 4.83695100  | -0.67144900 | 1.54986800  |
| C  | 6.98587900  | -0.96172000 | -0.05183600 |
| H  | 7.27205300  | 0.05914800  | 0.21487200  |
| H  | 7.86684400  | -1.59189300 | -0.20529700 |
| H  | 6.34831500  | -0.96668700 | -0.93960600 |
| C  | 2.12076800  | -0.63870300 | -3.32330500 |
| H  | 1.51258300  | -1.09021800 | -4.11229900 |
| H  | 2.62405500  | 0.25175100  | -3.70564900 |
| H  | 1.52302400  | -0.41652500 | -2.43203200 |
| S  | 3.42766700  | -1.81886200 | -2.84059700 |
| O  | 4.16868900  | -1.16589200 | -1.65285000 |
| C  | 2.33425200  | -3.08676000 | -2.11174600 |
| H  | 1.73075300  | -2.60313500 | -1.33566500 |
| H  | 1.70894900  | -3.51057100 | -2.90267300 |
| H  | 2.97977900  | -3.86226500 | -1.69458800 |
| C  | -0.34842700 | 4.15955900  | -0.09522400 |
| C  | 1.03063900  | 3.90288100  | -0.02768500 |
| C  | 1.94539100  | 4.97127000  | -0.00693700 |
| C  | 1.48022100  | 6.28150800  | -0.05585300 |
| C  | 0.10199000  | 6.53350900  | -0.12385600 |
| C  | -0.81113100 | 5.47572700  | -0.14217100 |
| H  | -1.05198600 | 3.33113200  | -0.10398000 |
| H  | 3.00684400  | 4.75073500  | 0.04777700  |
| H  | 2.18240200  | 7.10990600  | -0.04047400 |

|   |             |             |             |
|---|-------------|-------------|-------------|
| H | -0.25721700 | 7.55822500  | -0.16102500 |
| H | -1.87758200 | 5.67183200  | -0.19159400 |
| C | 1.49253400  | 2.50522300  | 0.02086300  |
| O | 2.67666600  | 2.17591600  | 0.08946800  |
| H | 0.71104900  | 1.72529200  | -0.01375500 |
| C | -0.74600400 | -1.78424000 | 1.01146800  |
| C | -0.13713400 | -1.61519200 | 2.41003800  |
| C | 0.20587400  | -2.81853500 | 1.59859500  |
| H | -0.81434000 | -1.74540100 | 3.24835900  |
| H | 0.60830200  | -0.83168900 | 2.50681900  |
| H | 1.18972700  | -2.85061500 | 1.14400100  |
| H | -0.24177600 | -3.76308800 | 1.88697700  |

**TS3e**

|   |             |             |             |
|---|-------------|-------------|-------------|
| C | -3.00480100 | 3.56078900  | 0.53015900  |
| C | -2.62266100 | 2.22270100  | 0.61782600  |
| C | -2.75619400 | 1.36471500  | -0.48372300 |
| C | -3.27859800 | 1.87948800  | -1.67357700 |
| C | -3.65287000 | 3.22472700  | -1.77183200 |
| C | -3.51927000 | 4.06894000  | -0.66927500 |
| H | -2.90489300 | 4.20892500  | 1.39690400  |
| H | -2.22042800 | 1.83618400  | 1.55094500  |
| H | -3.40129200 | 1.22326900  | -2.53193200 |
| H | -4.05582500 | 3.60580500  | -2.70609200 |
| H | -3.81738500 | 5.11132300  | -0.73817000 |
| C | -2.33013600 | -0.10664300 | -0.38818100 |
| C | -0.81943600 | -0.24868900 | -0.20381400 |
| H | -2.59254500 | -0.56747700 | -1.34965100 |
| H | -0.05754800 | 0.85683100  | -0.01483100 |
| C | -0.26821600 | -1.04351500 | 0.86568500  |
| O | 0.95024700  | -1.32531900 | 0.96031700  |
| C | -2.67192600 | -1.34210300 | 1.81352700  |
| O | -3.43535700 | -1.77183100 | 2.68012800  |
| N | -3.14386900 | -0.80950200 | 0.63405000  |
| C | -4.56146300 | -0.86675800 | 0.38061300  |
| C | -5.46528200 | -0.13906600 | 1.16009900  |
| C | -5.03220700 | -1.65582600 | -0.67364200 |
| C | -6.83170000 | -0.20140000 | 0.88281500  |
| H | -5.09617700 | 0.45957500  | 1.98464800  |
| C | -6.39954500 | -1.70939800 | -0.95536100 |
| H | -4.32910500 | -2.23660300 | -1.26396000 |
| C | -7.30304200 | -0.98185600 | -0.17701700 |
| H | -7.52896600 | 0.36225200  | 1.49597300  |
| H | -6.75645400 | -2.32696300 | -1.77466300 |

|    |             |             |             |
|----|-------------|-------------|-------------|
| H  | -8.36693500 | -1.02597100 | -0.39151400 |
| Na | 2.67411400  | -0.10583200 | 0.09234300  |
| C  | 1.73853500  | 3.60026600  | 1.00399500  |
| H  | 1.38355200  | 4.61579500  | 0.80669000  |
| H  | 1.87167500  | 3.45664500  | 2.07803300  |
| H  | 1.06041300  | 2.85557800  | 0.58149500  |
| S  | 3.38384200  | 3.39799100  | 0.23604200  |
| O  | 3.81664000  | 1.94276300  | 0.50525400  |
| C  | 2.83803300  | 3.46133700  | -1.50640900 |
| H  | 2.08909500  | 2.67340900  | -1.65785200 |
| H  | 2.42921400  | 4.45638200  | -1.70606900 |
| H  | 3.72687200  | 3.29956900  | -2.12011100 |
| C  | 6.74649200  | 0.48068900  | 0.67288200  |
| H  | 7.59277500  | 0.72783300  | 1.32038600  |
| H  | 6.06157700  | 1.32758600  | 0.58336700  |
| H  | 7.08476900  | 0.15344500  | -0.31389400 |
| S  | 5.76419700  | -0.85011700 | 1.44646200  |
| O  | 4.65219900  | -1.19666800 | 0.45259300  |
| C  | 6.98819400  | -2.19819100 | 1.28285100  |
| H  | 7.24007900  | -2.32208100 | 0.22664300  |
| H  | 7.87441400  | -1.95939800 | 1.87742100  |
| H  | 6.51527500  | -3.10555000 | 1.66273000  |
| C  | 0.21185900  | -2.45193900 | -2.15166900 |
| C  | 0.75598800  | -1.15962700 | -2.12852200 |
| C  | 1.95568100  | -0.93143600 | -2.81918300 |
| C  | 2.60028100  | -1.96703700 | -3.50327700 |
| C  | 2.04998800  | -3.25061000 | -3.51427200 |
| C  | 0.85063200  | -3.48791200 | -2.83588200 |
| H  | -0.70977000 | -2.65439000 | -1.61301000 |
| H  | 2.37807000  | 0.06963000  | -2.82287900 |
| H  | 3.53163400  | -1.76908200 | -4.02732200 |
| H  | 2.54982300  | -4.05792500 | -4.04195100 |
| H  | 0.41656000  | -4.48413300 | -2.83049300 |
| C  | 0.03448100  | 0.00145500  | -1.45977700 |
| O  | 0.90569000  | 1.02237700  | -0.93290000 |
| H  | -0.62467500 | 0.44223800  | -2.22853900 |
| C  | -1.18463900 | -1.42970800 | 1.98693300  |
| C  | -0.66455800 | -1.20903000 | 3.41841600  |
| C  | -0.71129800 | -2.58717400 | 2.87481700  |
| H  | -1.41624000 | -0.92133700 | 4.14626900  |
| H  | 0.30152900  | -0.71853500 | 3.48511200  |
| H  | 0.22269600  | -3.03826300 | 2.55846300  |
| H  | -1.49786100 | -3.24361000 | 3.22930500  |

**Int4e**

|    |             |             |             |
|----|-------------|-------------|-------------|
| C  | 3.21987300  | 2.00786000  | 3.09290000  |
| C  | 2.76729000  | 1.47827100  | 1.88476300  |
| C  | 2.88312000  | 0.10586200  | 1.61342700  |
| C  | 3.45863800  | -0.72016900 | 2.58464900  |
| C  | 3.90358600  | -0.19637900 | 3.80487200  |
| C  | 3.78705300  | 1.16970400  | 4.06200000  |
| H  | 3.13202200  | 3.07464200  | 3.28197200  |
| H  | 2.32034800  | 2.13231400  | 1.14045000  |
| H  | 3.56839500  | -1.78348800 | 2.38341300  |
| H  | 4.34586300  | -0.85595700 | 4.54650300  |
| H  | 4.13578700  | 1.58179800  | 5.00471000  |
| C  | 2.37169200  | -0.48218700 | 0.28457400  |
| C  | 0.87853200  | -0.29250600 | 0.10942800  |
| H  | 2.58353200  | -1.55964700 | 0.33017800  |
| H  | -0.49985400 | 0.33869500  | 2.13712000  |
| C  | 0.34106400  | 0.62946900  | -0.76142700 |
| O  | -0.92434800 | 0.90003600  | -0.88450800 |
| C  | 2.73767100  | 0.98888200  | -1.73495500 |
| O  | 3.49873000  | 1.48556500  | -2.56909400 |
| N  | 3.16957500  | 0.02951000  | -0.84929900 |
| C  | 4.53433200  | -0.41995000 | -0.92608500 |
| C  | 5.59553800  | 0.43685800  | -0.61906000 |
| C  | 4.79434700  | -1.74456700 | -1.29191500 |
| C  | 6.90894800  | -0.03221200 | -0.67749300 |
| H  | 5.38672100  | 1.46519600  | -0.34692800 |
| C  | 6.10914300  | -2.21436100 | -1.34192500 |
| H  | 3.96592200  | -2.39946600 | -1.54666500 |
| C  | 7.16997400  | -1.35839200 | -1.03500000 |
| H  | 7.72930100  | 0.63958900  | -0.44141000 |
| H  | 6.30269900  | -3.24380200 | -1.62998000 |
| H  | 8.19317200  | -1.72071100 | -1.07762600 |
| Na | -2.65935800 | -0.02510300 | 0.19527900  |
| C  | -3.03511400 | 3.23655300  | -1.64278900 |
| H  | -2.66177200 | 4.21630700  | -1.95490500 |
| H  | -3.92008600 | 2.97727800  | -2.22771000 |
| H  | -2.25977800 | 2.46545000  | -1.72020800 |
| S  | -3.57529100 | 3.34045500  | 0.09916800  |
| O  | -3.97484600 | 1.90714400  | 0.50584900  |
| C  | -1.93407300 | 3.62211100  | 0.84935800  |
| H  | -1.27626400 | 2.80648300  | 0.53349800  |
| H  | -1.55271500 | 4.59448300  | 0.52493000  |
| H  | -2.07980200 | 3.62455700  | 1.93143900  |
| C  | -6.57854400 | 0.13862000  | 1.26980700  |



|   |             |             |             |
|---|-------------|-------------|-------------|
| H | -7.61730900 | 0.46639300  | 1.16922200  |
| H | -5.92300400 | 0.99039200  | 1.46284700  |
| H | -6.47678100 | -0.61821900 | 2.05201900  |
| S | -6.01284400 | -0.56263700 | -0.31836800 |
| O | -4.62165500 | -1.15082600 | -0.06125200 |
| C | -7.13142600 | -2.00833100 | -0.36677900 |
| H | -6.97295500 | -2.61248200 | 0.52993500  |
| H | -8.16750900 | -1.66528300 | -0.43642700 |
| H | -6.86729900 | -2.58444500 | -1.25536800 |
| C | -0.65096800 | -2.57898900 | -1.03661800 |
| C | -0.71755200 | -2.32527100 | 0.33864400  |
| C | -1.46688900 | -3.19757500 | 1.14724000  |
| C | -2.13113400 | -4.29318300 | 0.59477600  |
| C | -2.05617200 | -4.53797200 | -0.78028200 |
| C | -1.31647800 | -3.67681900 | -1.59271400 |
| H | -0.07127400 | -1.91209300 | -1.66636800 |
| H | -1.52724100 | -3.00973800 | 2.21571000  |
| H | -2.70412600 | -4.95705600 | 1.23651100  |
| H | -2.56879200 | -5.39307200 | -1.21233400 |
| H | -1.25342600 | -3.85628400 | -2.66255900 |
| C | 0.04490300  | -1.17350700 | 1.00112100  |
| O | -0.95872000 | -0.43941000 | 1.78982100  |
| H | 0.71781100  | -1.63906000 | 1.73571200  |
| C | 1.28942300  | 1.38422600  | -1.66666200 |
| C | 1.02552200  | 2.87161200  | -1.92515000 |
| C | 0.72369700  | 1.88012000  | -2.99596900 |
| H | 1.90345100  | 3.49769900  | -2.04817000 |
| H | 0.19522000  | 3.30302700  | -1.37668900 |
| H | -0.31404400 | 1.61873900  | -3.16969700 |
| H | 1.40061000  | 1.83551000  | -3.84185000 |

**TS4e**

|   |            |             |             |
|---|------------|-------------|-------------|
| C | 1.31356200 | -2.59223600 | -2.34384400 |
| C | 1.54411900 | -1.74275400 | -1.26179100 |
| C | 2.00292300 | -0.43236800 | -1.46510800 |
| C | 2.22424800 | 0.00174900  | -2.77775200 |
| C | 1.98969500 | -0.84509600 | -3.86635500 |
| C | 1.53398900 | -2.14657900 | -3.65189500 |
| H | 0.95478000 | -3.60202500 | -2.16563700 |
| H | 1.35822800 | -2.10517700 | -0.25525600 |
| H | 2.59037900 | 1.01071300  | -2.95278500 |
| H | 2.16969100 | -0.48800900 | -4.87654300 |
| H | 1.35243100 | -2.80929900 | -4.49320300 |
| C | 2.24384400 | 0.53380100  | -0.29722900 |

|    |             |             |             |
|----|-------------|-------------|-------------|
| C  | 0.96478100  | 0.91856200  | 0.44918300  |
| H  | 2.65471600  | 1.44753900  | -0.73394000 |
| H  | -0.72546800 | 0.74441300  | -2.18596900 |
| C  | 0.54725500  | 0.05365700  | 1.52238200  |
| O  | -0.64306300 | -0.05960200 | 1.90010100  |
| C  | 3.03807500  | -0.66035100 | 1.77730300  |
| O  | 3.93601200  | -1.16996100 | 2.44873100  |
| N  | 3.29548500  | 0.03376400  | 0.61903400  |
| C  | 4.65604200  | 0.15492900  | 0.16513600  |
| C  | 5.37268400  | -0.96658700 | -0.26224900 |
| C  | 5.25356600  | 1.41891700  | 0.13240500  |
| C  | 6.68319800  | -0.82084600 | -0.72054000 |
| H  | 4.90539500  | -1.94414600 | -0.22330400 |
| C  | 6.56184900  | 1.56298100  | -0.33563600 |
| H  | 4.69656300  | 2.28188600  | 0.48627400  |
| C  | 7.27973300  | 0.44275300  | -0.76254400 |
| H  | 7.23753800  | -1.69603900 | -1.04688900 |
| H  | 7.02151600  | 2.54697000  | -0.35511800 |
| H  | 8.29906200  | 0.55280900  | -1.12120200 |
| Na | -2.08350900 | -0.35907900 | 0.05903000  |
| C  | -4.20226200 | 0.36601800  | -2.88866000 |
| H  | -4.57360900 | 1.02373400  | -3.68031200 |
| H  | -4.47384700 | -0.66877400 | -3.10745400 |
| H  | -3.12088300 | 0.48527000  | -2.73266700 |
| S  | -5.02640900 | 0.81636700  | -1.32196400 |
| O  | -4.39632600 | -0.08717600 | -0.23847900 |
| C  | -4.25219000 | 2.45795700  | -1.13337300 |
| H  | -3.16849400 | 2.34282500  | -1.24650600 |
| H  | -4.66837900 | 3.12184600  | -1.89729000 |
| H  | -4.51637900 | 2.82553600  | -0.14020500 |
| C  | -4.80376500 | -2.72437500 | 1.52251400  |
| H  | -5.71332400 | -3.32978500 | 1.57772600  |
| H  | -5.03795900 | -1.70476600 | 1.20701800  |
| H  | -4.26976100 | -2.72603000 | 2.47650700  |
| S  | -3.71184700 | -3.40657700 | 0.22674700  |
| O  | -2.38769400 | -2.64003300 | 0.31895500  |
| C  | -3.37991800 | -5.02472500 | 1.01258800  |
| H  | -2.94626200 | -4.85938600 | 2.00199200  |
| H  | -4.31108700 | -5.59435600 | 1.07908500  |
| H  | -2.66614100 | -5.54926100 | 0.37481600  |
| C  | -1.35268400 | 2.81742200  | 1.74711800  |
| C  | -0.73777000 | 2.91521300  | 0.48414500  |
| C  | -0.97631000 | 4.08465200  | -0.26946400 |
| C  | -1.78626100 | 5.11183500  | 0.20896500  |

|   |             |             |             |
|---|-------------|-------------|-------------|
| C | -2.38600200 | 4.99920500  | 1.46756500  |
| C | -2.16204600 | 3.84883200  | 2.22844700  |
| H | -1.20610300 | 1.92938000  | 2.34615500  |
| H | -0.51852600 | 4.17699500  | -1.25034100 |
| H | -1.94523200 | 6.00024900  | -0.39611300 |
| H | -3.01500900 | 5.79814100  | 1.85038000  |
| H | -2.62014800 | 3.74897400  | 3.20880700  |
| C | 0.22232400  | 1.95486200  | -0.09888200 |
| O | -1.35274900 | 1.04977900  | -1.51673000 |
| H | 0.67172500  | 2.37536000  | -0.99421700 |
| C | 1.59795600  | -0.77407800 | 2.19249600  |
| C | 1.16806500  | -2.16163000 | 2.70879500  |
| C | 1.36770400  | -1.06456300 | 3.68263000  |
| H | 1.93004400  | -2.93198500 | 2.64836300  |
| H | 0.15183600  | -2.44393100 | 2.45169800  |
| H | 0.48677600  | -0.59385700 | 4.10523300  |
| H | 2.27038600  | -1.07594700 | 4.28308200  |

**Int5e**

|   |             |             |             |
|---|-------------|-------------|-------------|
| C | -2.89335600 | 1.95264200  | -3.13962500 |
| C | -2.68123800 | 1.37888400  | -1.88421200 |
| C | -3.14451500 | 0.08645900  | -1.60289900 |
| C | -3.82920500 | -0.61390700 | -2.60411400 |
| C | -4.04389900 | -0.04293400 | -3.86084700 |
| C | -3.57426900 | 1.24381800  | -4.13316700 |
| H | -2.52513300 | 2.95464700  | -3.34053700 |
| H | -2.15390500 | 1.94790400  | -1.12508100 |
| H | -4.20211800 | -1.61476500 | -2.39967800 |
| H | -4.58129700 | -0.60102200 | -4.62214000 |
| H | -3.74004200 | 1.69194600  | -5.10841400 |
| C | -2.89482900 | -0.59852000 | -0.25215100 |
| C | -1.49164100 | -1.19601100 | -0.16663100 |
| H | -3.60261700 | -1.42830200 | -0.18693100 |
| C | -0.42025600 | -0.23472900 | 0.17492700  |
| O | 0.74678700  | -0.33402900 | -0.21001700 |
| C | -2.24961900 | 1.04129200  | 1.53906800  |
| O | -2.54224900 | 1.83544000  | 2.43211100  |
| N | -3.19568800 | 0.27759900  | 0.89933900  |
| C | -4.58210100 | 0.42176100  | 1.26349100  |
| C | -5.28845400 | 1.58389000  | 0.94153000  |
| C | -5.22615400 | -0.62818300 | 1.92517700  |
| C | -6.63814800 | 1.69193500  | 1.28131300  |
| H | -4.77817900 | 2.39672900  | 0.43696200  |
| C | -6.57890200 | -0.52041100 | 2.25625300  |

|    |             |             |             |
|----|-------------|-------------|-------------|
| H  | -4.66255400 | -1.51809100 | 2.19088800  |
| C  | -7.28717000 | 0.64038600  | 1.93469500  |
| H  | -7.18291200 | 2.59804200  | 1.03297000  |
| H  | -7.07371100 | -1.33726100 | 2.77346500  |
| H  | -8.33776200 | 0.72711000  | 2.19594600  |
| C  | 6.54450600  | -0.50996900 | -0.02090100 |
| H  | 7.35681600  | -1.22264100 | 0.15457900  |
| H  | 6.95921100  | 0.48410600  | -0.20396500 |
| H  | 5.85924400  | -0.84835900 | -0.82283900 |
| S  | 5.54502600  | -0.39296200 | 1.50233500  |
| O  | 4.36971900  | 0.55968000  | 1.16346600  |
| C  | 4.85349600  | -2.08137300 | 1.44608100  |
| H  | 4.43839000  | -2.23288100 | 0.43542700  |
| H  | 5.66098100  | -2.78782000 | 1.66342900  |
| H  | 4.09415000  | -2.13779800 | 2.22908100  |
| C  | 3.83464700  | 3.69137100  | 1.17123600  |
| H  | 4.59214000  | 4.42339700  | 1.46669000  |
| H  | 4.02219300  | 2.72613700  | 1.64886700  |
| H  | 2.82808100  | 4.05376400  | 1.39502300  |
| S  | 3.98247400  | 3.37918800  | -0.62129400 |
| O  | 2.80661900  | 2.46919600  | -1.00674900 |
| C  | 3.50557400  | 5.04362900  | -1.20976200 |
| H  | 2.51327500  | 5.29089900  | -0.82432400 |
| H  | 4.25006500  | 5.77273300  | -0.87804300 |
| H  | 3.48354200  | 5.00241600  | -2.30028600 |
| C  | -0.58291100 | -4.82894400 | 0.02795100  |
| C  | -0.25511400 | -3.49857000 | -0.32875200 |
| C  | 1.07617600  | -3.22277700 | -0.69927800 |
| C  | 2.04407400  | -4.22776700 | -0.67845700 |
| C  | 1.70782300  | -5.52738200 | -0.29274700 |
| C  | 0.38585500  | -5.82725700 | 0.05971900  |
| H  | -1.60953700 | -5.07115500 | 0.29284300  |
| H  | 1.36685500  | -2.23502300 | -1.02169000 |
| H  | 3.05429300  | -3.95479000 | -0.97095400 |
| H  | 2.46409000  | -6.30760300 | -0.27858200 |
| H  | 0.11112600  | -6.83764600 | 0.34921900  |
| C  | -1.36612300 | -2.54234600 | -0.32833500 |
| H  | -2.32535700 | -3.05411400 | -0.42385300 |
| O  | 4.07159600  | -1.55525500 | -1.46334900 |
| H  | 4.11764100  | -1.93052500 | -2.34995300 |
| Na | 2.98971900  | 0.15816700  | -0.71406200 |
| C  | -0.82229100 | 0.87788500  | 1.08727400  |
| C  | -0.01610300 | 2.19260100  | 0.98897600  |
| C  | 0.23784000  | 1.29018300  | 2.12969200  |

|   |             |            |            |
|---|-------------|------------|------------|
| H | -0.60269600 | 3.08678700 | 1.17558800 |
| H | 0.71589900  | 2.23378800 | 0.18736300 |
| H | 1.14589800  | 0.69633900 | 2.11842500 |
| H | -0.17508900 | 1.55620800 | 3.09642500 |

**TS5e**

|   |             |             |             |
|---|-------------|-------------|-------------|
| C | -3.25442200 | 2.37148400  | -3.23733800 |
| C | -3.45358800 | 1.51848700  | -2.15025400 |
| C | -2.43802600 | 0.64724100  | -1.72547000 |
| C | -1.21902500 | 0.64466300  | -2.41823900 |
| C | -1.01858800 | 1.50785800  | -3.50077800 |
| C | -2.03264500 | 2.37150900  | -3.91682500 |
| H | -4.05450900 | 3.03687100  | -3.55015700 |
| H | -4.40515600 | 1.53589100  | -1.63069500 |
| H | -0.40027600 | -0.00731300 | -2.12572600 |
| H | -0.05673900 | 1.50269700  | -4.00447400 |
| H | -1.87376300 | 3.03953600  | -4.75876600 |
| C | -2.70038000 | -0.32925500 | -0.55979700 |
| C | -1.42446000 | -0.84404700 | 0.09526600  |
| H | -3.24127900 | -1.18689600 | -0.96362800 |
| C | -0.72881100 | 0.26807800  | 0.80137000  |
| O | 0.52603400  | 0.42511700  | 0.78113600  |
| C | -1.58009900 | 1.15999000  | 1.48025500  |
| C | 0.04960600  | 2.66095800  | 1.67281600  |
| C | -0.94833300 | 2.07712800  | 2.53028800  |
| H | -0.28714500 | 3.27338000  | 0.84029900  |
| H | 1.12073200  | 2.51436500  | 1.77259400  |
| H | -0.56071600 | 1.56162900  | 3.41186100  |
| H | -1.77162400 | 2.75468600  | 2.79844700  |
| C | -3.04521700 | 1.17303600  | 1.38316400  |
| O | -3.73869900 | 1.89177700  | 2.11224900  |
| N | -3.58891400 | 0.27658800  | 0.46659600  |
| C | -4.97463600 | -0.07663100 | 0.50889600  |
| C | -5.97486100 | 0.90344600  | 0.60232700  |
| C | -5.34582500 | -1.42945500 | 0.45500900  |
| C | -7.31936700 | 0.52839100  | 0.62761800  |
| H | -5.69485700 | 1.94623500  | 0.67139100  |
| C | -6.69296300 | -1.79454000 | 0.46653000  |
| H | -4.58170500 | -2.19976600 | 0.42604700  |
| C | -7.68744800 | -0.81740600 | 0.55329300  |
| H | -8.08235700 | 1.29806000  | 0.70156000  |
| H | -6.96132700 | -2.84627600 | 0.42409900  |
| H | -8.73537700 | -1.10174900 | 0.56861800  |
| C | 5.35638100  | -0.49308100 | -2.54063700 |

|    |             |             |             |
|----|-------------|-------------|-------------|
| H  | 5.77888000  | -1.15103400 | -3.30680000 |
| H  | 6.06323400  | 0.30753000  | -2.31027100 |
| H  | 4.35305400  | -0.11817700 | -2.82085100 |
| S  | 5.13664500  | -1.46033100 | -1.00867700 |
| O  | 4.45670700  | -0.49633500 | -0.00094400 |
| C  | 3.81765900  | -2.56413800 | -1.61894600 |
| H  | 3.03594300  | -1.92174300 | -2.06548700 |
| H  | 4.25945200  | -3.24244200 | -2.35615700 |
| H  | 3.45884000  | -3.13366200 | -0.75911600 |
| C  | 5.23039600  | 1.54283300  | 2.24881700  |
| H  | 6.28011600  | 1.76398500  | 2.46373500  |
| H  | 5.12500600  | 0.53224700  | 1.84569500  |
| H  | 4.60724300  | 1.68862600  | 3.13518700  |
| S  | 4.65255700  | 2.64991100  | 0.91933800  |
| O  | 3.13947200  | 2.41224600  | 0.78349200  |
| C  | 4.80417100  | 4.23343100  | 1.82259200  |
| H  | 4.21325200  | 4.18459800  | 2.74076900  |
| H  | 5.85791500  | 4.42417500  | 2.04435700  |
| H  | 4.41501600  | 5.01422600  | 1.16650000  |
| C  | 0.08253200  | -4.30169800 | 0.08996700  |
| C  | 0.00693800  | -2.96450100 | 0.53433300  |
| C  | 0.93268600  | -2.54198300 | 1.50953900  |
| C  | 1.88730800  | -3.42503500 | 2.01208000  |
| C  | 1.95006500  | -4.74619000 | 1.55640500  |
| C  | 1.04218300  | -5.18174900 | 0.58741100  |
| H  | -0.62520200 | -4.65016400 | -0.65812100 |
| H  | 0.91661900  | -1.51922100 | 1.86103800  |
| H  | 2.59183800  | -3.07588700 | 2.76147700  |
| H  | 2.69677400  | -5.42775700 | 1.95380700  |
| H  | 1.07752900  | -6.20453200 | 0.22340800  |
| C  | -1.07246400 | -2.14289100 | -0.02949700 |
| H  | -1.74962900 | -2.72961400 | -0.65114200 |
| O  | 2.33733000  | -0.08701000 | -2.58596400 |
| H  | 1.89135800  | 0.05888200  | -3.42626000 |
| Na | 2.41588000  | 0.56429800  | -0.54735300 |

**Pr+NaOH**

|   |            |             |             |
|---|------------|-------------|-------------|
| C | 2.23990900 | -2.39772700 | 2.50374200  |
| C | 2.28884700 | -1.29445600 | 1.65039700  |
| C | 2.85725400 | -1.40630800 | 0.37356000  |
| C | 3.38023900 | -2.64243700 | -0.02383300 |
| C | 3.33394600 | -3.74930200 | 0.82881300  |
| C | 2.76132400 | -3.62973600 | 2.09597300  |

|   |             |             |             |
|---|-------------|-------------|-------------|
| H | 1.78752300  | -2.29539000 | 3.48585300  |
| H | 1.87479300  | -0.34719300 | 1.98033200  |
| H | 3.83466200  | -2.74237800 | -1.00675200 |
| H | 3.74965800  | -4.69874300 | 0.50341800  |
| H | 2.72156500  | -4.48678700 | 2.76200400  |
| C | 2.91551200  | -0.21994200 | -0.59874900 |
| C | 1.52948000  | 0.10611600  | -1.17162600 |
| H | 3.53506800  | -0.53820100 | -1.44079400 |
| C | 0.83795000  | 1.15816100  | -0.44912200 |
| O | -0.48074000 | 1.47520300  | -0.63217500 |
| C | 1.48320400  | 2.00938400  | 0.38383300  |
| C | -0.64881100 | 2.83975600  | -0.09564000 |
| C | 0.51620200  | 3.04967600  | 0.88659300  |
| H | -1.64568500 | 2.89282800  | 0.34046300  |
| H | -0.58000100 | 3.51810500  | -0.95388300 |
| H | 0.92770800  | 4.06133000  | 0.83944400  |
| H | 0.22517800  | 2.86032100  | 1.92889100  |
| C | 2.92458200  | 1.98496800  | 0.62532400  |
| O | 3.49423700  | 2.85728700  | 1.28591300  |
| N | 3.60636000  | 0.94701700  | 0.00271600  |
| C | 5.03303100  | 0.85381900  | 0.12902200  |
| C | 5.64353100  | 0.73901000  | 1.38274600  |
| C | 5.82155100  | 0.86178000  | -1.02770800 |
| C | 7.03220800  | 0.63117400  | 1.47315800  |
| H | 5.03097900  | 0.74506900  | 2.27657200  |
| C | 7.20975200  | 0.74009000  | -0.93429100 |
| H | 5.34585700  | 0.97869900  | -1.99752200 |
| C | 7.81916600  | 0.62598100  | 0.31783100  |
| H | 7.49931700  | 0.54641900  | 2.45011300  |
| H | 7.81291000  | 0.74892500  | -1.83769900 |
| H | 8.89914500  | 0.53836600  | 0.39323000  |
| C | -3.94666000 | -2.40417800 | 2.60768000  |
| H | -4.02900700 | -3.40258400 | 3.04866400  |
| H | -4.45150300 | -1.67649600 | 3.24733400  |
| H | -2.89721200 | -2.13284000 | 2.38738600  |
| S | -4.83116100 | -2.40851800 | 1.01042400  |
| O | -4.60628900 | -0.99928500 | 0.40028500  |
| C | -3.69047800 | -3.52463700 | 0.12687600  |
| H | -2.67760900 | -3.09706400 | 0.24412900  |
| H | -3.77216600 | -4.51991700 | 0.57516100  |
| H | -4.02175600 | -3.56206000 | -0.91322900 |
| C | -6.12610200 | 1.70318300  | -0.08620900 |
| H | -7.17752400 | 1.85960900  | 0.17215700  |
| H | -5.93959300 | 0.65246400  | -0.31992600 |

|    |             |             |             |
|----|-------------|-------------|-------------|
| H  | -5.81940400 | 2.35616800  | -0.90752200 |
| S  | -5.09862300 | 2.06193800  | 1.37703000  |
| O  | -3.63632900 | 2.02541300  | 0.90070400  |
| C  | -5.48995200 | 3.84091800  | 1.53216700  |
| H  | -5.23300400 | 4.34865000  | 0.59919900  |
| H  | -6.55186800 | 3.95835300  | 1.76543000  |
| H  | -4.88377500 | 4.23220400  | 2.35124400  |
| C  | -0.31564000 | -0.20113200 | -4.29976300 |
| C  | -0.20489100 | -0.54667400 | -2.94129100 |
| C  | -1.35025500 | -0.98446000 | -2.25347500 |
| C  | -2.58569600 | -1.02304700 | -2.90569900 |
| C  | -2.69444600 | -0.64180100 | -4.24675700 |
| C  | -1.55310400 | -0.23597700 | -4.94489000 |
| H  | 0.57007300  | 0.11307200  | -4.84659000 |
| H  | -1.25725600 | -1.32651400 | -1.21937200 |
| H  | -3.46503400 | -1.35708800 | -2.36140000 |
| H  | -3.65786400 | -0.67361700 | -4.74829900 |
| H  | -1.62484700 | 0.04995700  | -5.99067400 |
| C  | 1.12169500  | -0.53775300 | -2.28942800 |
| H  | 1.87390700  | -1.15419300 | -2.78440200 |
| O  | -1.44028200 | -1.68920700 | 1.02707800  |
| H  | -0.53407600 | -1.93009400 | 1.24746500  |
| Na | -2.48563800 | 0.07407200  | 0.43285800  |

**TS3e'**

|   |             |             |             |
|---|-------------|-------------|-------------|
| C | -2.96519000 | -3.04195900 | 0.20659700  |
| C | -2.43907600 | -1.76989900 | -0.02776100 |
| C | -1.87788000 | -1.02410500 | 1.01761000  |
| C | -1.85047200 | -1.58501700 | 2.30021500  |
| C | -2.36203800 | -2.86531500 | 2.53745600  |
| C | -2.92421600 | -3.59875800 | 1.48992900  |
| H | -3.42122200 | -3.59482900 | -0.61085700 |
| H | -2.48325100 | -1.33368900 | -1.02083900 |
| H | -1.43455400 | -1.01042000 | 3.12536600  |
| H | -2.33600900 | -3.28035700 | 3.54144700  |
| H | -3.33995700 | -4.58560000 | 1.67339200  |
| C | -1.23012900 | 0.34482000  | 0.77898400  |
| C | 0.21686800  | 0.12642000  | 0.40227900  |
| H | -1.28294700 | 0.88500300  | 1.74452600  |
| H | 0.75384600  | -0.63247900 | 0.96361700  |
| C | 0.87336400  | 0.96504700  | -0.47125500 |
| O | 2.17284300  | 0.90967800  | -0.72019600 |
| C | 0.12580700  | 1.98549500  | -1.14097900 |
| C | 1.83263100  | 2.09581500  | -2.68917100 |



|    |             |             |             |
|----|-------------|-------------|-------------|
| C  | 0.89476500  | 2.96763700  | -1.98484000 |
| H  | 1.43227000  | 1.34328900  | -3.35982300 |
| H  | 2.90991400  | 2.19533100  | -2.64166600 |
| H  | 1.38109000  | 3.78028900  | -1.43211500 |
| H  | 0.14985000  | 3.40479300  | -2.66618400 |
| C  | -1.31108300 | 2.00653100  | -1.14574800 |
| O  | -1.97536900 | 2.75800800  | -1.87996600 |
| N  | -1.96900300 | 1.12670600  | -0.23927600 |
| C  | -3.37011400 | 1.32573500  | -0.02177100 |
| C  | -4.26160500 | 1.30480200  | -1.10700500 |
| C  | -3.88626600 | 1.51932800  | 1.26784800  |
| C  | -5.62952700 | 1.47886400  | -0.90184800 |
| H  | -3.87209100 | 1.16941800  | -2.10777600 |
| C  | -5.25961200 | 1.68277300  | 1.46935600  |
| H  | -3.22125200 | 1.54856400  | 2.12380600  |
| C  | -6.13997900 | 1.66571400  | 0.38694500  |
| H  | -6.30081200 | 1.46411700  | -1.75623300 |
| H  | -5.63604900 | 1.82933400  | 2.47819000  |
| H  | -7.20709700 | 1.79479600  | 0.54337000  |
| Na | 3.59123400  | -0.71762100 | -0.26955400 |
| C  | 0.78583100  | -2.36805100 | -2.40088000 |
| H  | -0.09522900 | -2.90736800 | -2.75976500 |
| H  | 1.31622300  | -1.92468600 | -3.24577400 |
| H  | 0.50832200  | -1.59990600 | -1.67039000 |
| S  | 1.92950400  | -3.56434900 | -1.63069900 |
| O  | 3.05843000  | -2.73653300 | -0.99260900 |
| C  | 0.85589100  | -4.09168700 | -0.25176000 |
| H  | 0.51163500  | -3.21789100 | 0.30535400  |
| H  | 0.00445400  | -4.64589500 | -0.65478600 |
| H  | 1.45940900  | -4.74442100 | 0.38171000  |
| C  | 3.21074100  | 1.68757300  | 2.63305800  |
| H  | 3.05859500  | 2.68555600  | 3.05389400  |
| H  | 3.18651600  | 0.94379800  | 3.43199300  |
| H  | 2.46277700  | 1.46278500  | 1.86718000  |
| S  | 4.87884500  | 1.61028900  | 1.88919800  |
| O  | 4.98384600  | 0.23384900  | 1.20665300  |
| C  | 4.59072300  | 2.82003900  | 0.54989800  |
| H  | 3.73113600  | 2.48135100  | -0.03837800 |
| H  | 4.41439600  | 3.80433900  | 0.99316300  |
| H  | 5.50129100  | 2.84578600  | -0.05236800 |

**Int3e'**

|   |            |            |             |
|---|------------|------------|-------------|
| C | 3.75653300 | 3.05553300 | -1.53533900 |
| C | 2.54892500 | 2.45674600 | -1.17446100 |

|    |             |             |             |
|----|-------------|-------------|-------------|
| C  | 2.33782000  | 2.00074000  | 0.13656400  |
| C  | 3.36254500  | 2.17607100  | 1.07518600  |
| C  | 4.57086800  | 2.78656800  | 0.72188500  |
| C  | 4.77292900  | 3.22475100  | -0.58769000 |
| H  | 3.90417100  | 3.39710100  | -2.55650300 |
| H  | 1.76030700  | 2.34085400  | -1.91060700 |
| H  | 3.21638200  | 1.82765100  | 2.09522800  |
| H  | 5.35054700  | 2.91501300  | 1.46792400  |
| H  | 5.71007300  | 3.69707200  | -0.86911900 |
| C  | 1.01925700  | 1.33195300  | 0.56050100  |
| C  | -0.21649300 | 2.09767800  | 0.13448900  |
| H  | 1.05426300  | 1.27405200  | 1.65434300  |
| H  | -0.40475700 | 3.06856900  | 0.57770900  |
| C  | -0.79326200 | 1.70440700  | -1.03421300 |
| O  | -1.81931300 | 2.39305500  | -1.65713400 |
| C  | -0.46499900 | 0.52571200  | -1.75801300 |
| C  | -1.94789700 | 1.85974100  | -3.00675500 |
| C  | -1.31673700 | 0.44956400  | -3.00112000 |
| H  | -1.41015700 | 2.53709400  | -3.68138400 |
| H  | -3.01084900 | 1.87717800  | -3.26162000 |
| H  | -2.08954700 | -0.33403500 | -2.95473900 |
| H  | -0.74308900 | 0.27156800  | -3.91856400 |
| C  | 0.43656900  | -0.41514200 | -1.23746800 |
| O  | 0.72854500  | -1.52673500 | -1.74825000 |
| N  | 0.92088900  | -0.10275600 | 0.09874800  |
| C  | 1.89189800  | -0.97742600 | 0.69150500  |
| C  | 3.02190700  | -1.43165900 | -0.00424100 |
| C  | 1.72180000  | -1.36227600 | 2.02965500  |
| C  | 3.95022700  | -2.26098600 | 0.62872600  |
| H  | 3.15997000  | -1.14331600 | -1.03857900 |
| C  | 2.66024600  | -2.17743700 | 2.66667700  |
| H  | 0.84605800  | -1.01886700 | 2.57535000  |
| C  | 3.77855000  | -2.63601000 | 1.96486000  |
| H  | 4.81931700  | -2.60638000 | 0.07539000  |
| H  | 2.51076100  | -2.46019000 | 3.70518500  |
| H  | 4.50839600  | -3.27512400 | 2.45360500  |
| Na | -1.62060900 | -0.56378700 | 0.55937800  |
| C  | -4.64632800 | 2.20435100  | 0.27360100  |
| H  | -5.22259400 | 3.12398100  | 0.41136700  |
| H  | -5.25325000 | 1.46996100  | -0.26032700 |
| H  | -3.71277200 | 2.39449300  | -0.26546000 |
| S  | -4.28987800 | 1.48424200  | 1.91602800  |
| O  | -3.36040500 | 0.28998200  | 1.67654900  |
| C  | -3.23102300 | 2.83219900  | 2.55138400  |

|   |             |             |             |
|---|-------------|-------------|-------------|
| H | -2.36504000 | 2.93676400  | 1.89332500  |
| H | -3.81432100 | 3.75573800  | 2.60194300  |
| H | -2.91285700 | 2.53926000  | 3.55379900  |
| C | 0.16726200  | -4.31105800 | -0.16418500 |
| H | 0.45954400  | -5.23291300 | -0.67630800 |
| H | 0.32927300  | -4.41827300 | 0.90998900  |
| H | 0.69927900  | -3.44148200 | -0.56194700 |
| S | -1.62507300 | -4.06687300 | -0.40958900 |
| O | -1.98707200 | -2.73289200 | 0.26458400  |
| C | -1.57174000 | -3.73461900 | -2.20538000 |
| H | -0.87793900 | -2.90559200 | -2.38398400 |
| H | -1.24828200 | -4.64625600 | -2.71683000 |
| H | -2.59039000 | -3.48454700 | -2.50959400 |

**Int4e'**

|   |             |             |             |
|---|-------------|-------------|-------------|
| C | -2.53948000 | 3.38758000  | 1.92160600  |
| C | -2.27860100 | 2.07738600  | 1.51868400  |
| C | -2.27750200 | 1.73208100  | 0.15628000  |
| C | -2.54762700 | 2.73477500  | -0.78291200 |
| C | -2.80807300 | 4.05103300  | -0.38393100 |
| C | -2.80575100 | 4.38251500  | 0.97167200  |
| H | -2.54780600 | 3.63243800  | 2.98083300  |
| H | -2.08147600 | 1.31029200  | 2.26122600  |
| H | -2.56460800 | 2.48294600  | -1.84137700 |
| H | -3.02395200 | 4.80971800  | -1.13178700 |
| H | -3.02169400 | 5.39923000  | 1.28891300  |
| C | -1.96496900 | 0.30048000  | -0.31634100 |
| C | -0.51096700 | -0.07690800 | -0.10104100 |
| H | -2.16761500 | 0.29830900  | -1.39337000 |
| H | 0.23910200  | 0.30728600  | -0.77803100 |
| C | -0.24991100 | -0.77855400 | 1.04433200  |
| O | 1.04247900  | -1.09794000 | 1.48195100  |
| C | -1.21166500 | -1.33664300 | 1.89609700  |
| C | 0.91400200  | -1.64156600 | 2.83542500  |
| C | -0.53427600 | -2.14534000 | 2.97032000  |
| H | 1.12005400  | -0.82213300 | 3.53482600  |
| H | 1.68118800  | -2.41215100 | 2.94750600  |
| H | -0.60402700 | -3.23224300 | 2.79958600  |
| H | -0.92115200 | -1.96330300 | 3.97971300  |
| C | -2.57407200 | -1.41534000 | 1.48922400  |
| O | -3.44262800 | -2.10328700 | 2.05742500  |
| N | -2.88929000 | -0.70143700 | 0.29074900  |
| C | -4.22747100 | -0.71187400 | -0.20202500 |
| C | -5.32686000 | -0.46668100 | 0.63576100  |

|    |             |             |             |
|----|-------------|-------------|-------------|
| C  | -4.46375500 | -0.95629400 | -1.56463500 |
| C  | -6.62273100 | -0.46909100 | 0.11734800  |
| H  | -5.15866300 | -0.29336600 | 1.69081600  |
| C  | -5.75999400 | -0.94228100 | -2.08322000 |
| H  | -3.62425400 | -1.16628200 | -2.22169100 |
| C  | -6.84981600 | -0.70119500 | -1.24251300 |
| H  | -7.46090500 | -0.28087000 | 0.78300300  |
| H  | -5.91735300 | -1.13280400 | -3.14178100 |
| H  | -7.86055900 | -0.69575700 | -1.64054800 |
| Na | 2.58261900  | -1.61303300 | -0.15995800 |
| C  | 6.06228500  | -0.07196100 | 1.58132000  |
| H  | 7.02095000  | 0.45053700  | 1.51936500  |
| H  | 5.91556000  | -0.45718000 | 2.59210100  |
| H  | 5.23407300  | 0.58168300  | 1.29892300  |
| S  | 6.09173700  | -1.52016600 | 0.46348100  |
| O  | 4.68434400  | -2.12060200 | 0.50542100  |
| C  | 6.20751900  | -0.59840000 | -1.11348900 |
| H  | 5.35093200  | 0.07584200  | -1.19510400 |
| H  | 7.15366000  | -0.05056800 | -1.14089500 |
| H  | 6.18754400  | -1.34088500 | -1.91372000 |
| C  | -0.65278700 | -2.71673600 | -2.72474400 |
| H  | -1.61368200 | -3.18872900 | -2.94756900 |
| H  | -0.16351700 | -2.40807700 | -3.65083100 |
| H  | -0.77037900 | -1.86958200 | -2.04111600 |
| S  | 0.44271100  | -3.94121700 | -1.92995200 |
| O  | 1.69649700  | -3.16395700 | -1.49668000 |
| C  | -0.55621000 | -4.22016500 | -0.42648900 |
| H  | -0.75564700 | -3.27116900 | 0.07851800  |
| H  | -1.49264200 | -4.70599100 | -0.71493300 |
| H  | 0.02152700  | -4.88933000 | 0.21422400  |
| C  | 1.41870500  | 3.89987200  | 0.27929600  |
| C  | 2.25414200  | 2.98970400  | -0.39260500 |
| C  | 3.00957500  | 3.42204500  | -1.49987500 |
| C  | 2.93367500  | 4.74662900  | -1.91844600 |
| C  | 2.10170700  | 5.64967300  | -1.24121400 |
| C  | 1.34301500  | 5.22527400  | -0.14548500 |
| H  | 0.81304800  | 3.55717800  | 1.11403000  |
| H  | 3.64205400  | 2.70635400  | -2.01548300 |
| H  | 3.51560500  | 5.08183400  | -2.77206700 |
| H  | 2.04157300  | 6.68210500  | -1.57353700 |
| H  | 0.68672300  | 5.92098400  | 0.36749400  |
| C  | 2.32500600  | 1.60435500  | 0.08272800  |
| O  | 2.99541000  | 0.71343200  | -0.46096100 |
| H  | 1.73990900  | 1.37181900  | 0.98656700  |

**TS4e'**

|    |             |             |             |
|----|-------------|-------------|-------------|
| C  | -2.82843600 | 3.69437700  | 1.20800700  |
| C  | -2.67350300 | 2.31244000  | 1.06125200  |
| C  | -2.48652500 | 1.74204600  | -0.20541600 |
| C  | -2.48396700 | 2.59218000  | -1.32173100 |
| C  | -2.64568400 | 3.97270500  | -1.18136000 |
| C  | -2.81405000 | 4.53189500  | 0.08909100  |
| H  | -2.97478700 | 4.11451800  | 2.19964500  |
| H  | -2.70535600 | 1.67721900  | 1.93984800  |
| H  | -2.35914800 | 2.16610600  | -2.31481100 |
| H  | -2.65740200 | 4.60755200  | -2.06368000 |
| H  | -2.95199200 | 5.60352800  | 0.20397000  |
| C  | -2.25253900 | 0.23965000  | -0.41853400 |
| C  | -0.75610900 | -0.10871900 | -0.37441300 |
| H  | -2.60349000 | 0.01770300  | -1.42941800 |
| H  | 0.25339500  | 0.74406100  | -0.88724400 |
| C  | -0.37647700 | -0.55999100 | 0.93385200  |
| O  | 0.95639300  | -0.72394500 | 1.27567500  |
| C  | -1.21415300 | -0.82635000 | 1.96781100  |
| C  | 0.97944700  | -1.37683600 | 2.59078400  |
| C  | -0.41987100 | -1.16229100 | 3.20472700  |
| H  | 1.79961000  | -0.92852900 | 3.15492500  |
| H  | 1.19096100  | -2.43691900 | 2.41587900  |
| H  | -0.78736800 | -2.06102300 | 3.70839800  |
| H  | -0.42496700 | -0.34792700 | 3.94312800  |
| C  | -2.64587200 | -0.96086600 | 1.77031900  |
| O  | -3.40457800 | -1.42597500 | 2.63014100  |
| N  | -3.09836700 | -0.58305300 | 0.49628500  |
| C  | -4.47326700 | -0.75598900 | 0.14020200  |
| C  | -5.50988100 | -0.28854500 | 0.95997400  |
| C  | -4.79436700 | -1.39131500 | -1.06843200 |
| C  | -6.84023100 | -0.45394900 | 0.57082700  |
| H  | -5.26969100 | 0.18504100  | 1.90333200  |
| C  | -6.12588600 | -1.54117300 | -1.46104200 |
| H  | -3.99830200 | -1.78134000 | -1.69638500 |
| C  | -7.15642900 | -1.07418700 | -0.64122000 |
| H  | -7.63317900 | -0.09046900 | 1.21866500  |
| H  | -6.35545100 | -2.03644000 | -2.40050900 |
| H  | -8.19330800 | -1.19612100 | -0.94104900 |
| Na | 2.69718900  | -0.09844200 | -0.21940000 |
| C  | 1.28555900  | 3.57455300  | 0.20199300  |
| H  | 0.76471400  | 4.46415300  | -0.16158600 |
| H  | 1.51922100  | 3.68963300  | 1.26205600  |

|   |             |             |             |
|---|-------------|-------------|-------------|
| H | 0.67785700  | 2.68169200  | 0.03921000  |
| S | 2.88057600  | 3.42137100  | -0.67029100 |
| O | 3.50769500  | 2.09158400  | -0.19775400 |
| C | 2.24410900  | 3.12247700  | -2.35629400 |
| H | 1.66880200  | 2.18945800  | -2.37205700 |
| H | 1.63659000  | 3.98200700  | -2.65385000 |
| H | 3.11665400  | 3.04699500  | -3.00889200 |
| C | 6.54802100  | 0.90638600  | 0.05277700  |
| H | 7.43350600  | 1.36628900  | 0.50097500  |
| H | 5.75911300  | 1.64713600  | -0.10366700 |
| H | 6.79584500  | 0.40646600  | -0.88740100 |
| S | 5.85327700  | -0.31272900 | 1.22025700  |
| O | 4.65880500  | -0.96100400 | 0.50844500  |
| C | 7.19312500  | -1.55113700 | 1.12665600  |
| H | 7.30676200  | -1.87409100 | 0.08885700  |
| H | 8.11872400  | -1.11208700 | 1.50904200  |
| H | 6.89330500  | -2.39498200 | 1.75052700  |
| C | -0.40401900 | -3.18636400 | -1.01780600 |
| C | 0.41901000  | -2.18131500 | -1.55105400 |
| C | 1.65921500  | -2.55076300 | -2.09109800 |
| C | 2.07513600  | -3.88645800 | -2.08585300 |
| C | 1.25109100  | -4.87693600 | -1.54661300 |
| C | 0.00726900  | -4.52102800 | -1.01483400 |
| H | -1.36839000 | -2.92051900 | -0.59328000 |
| H | 2.28751500  | -1.78291900 | -2.53320200 |
| H | 3.04065400  | -4.15180400 | -2.50860200 |
| H | 1.57138800  | -5.91507500 | -1.54220800 |
| H | -0.64270800 | -5.28232200 | -0.59191000 |
| C | -0.05746400 | -0.73946700 | -1.60631200 |
| O | 1.01825100  | 0.22338600  | -1.73648400 |
| H | -0.74327100 | -0.65357800 | -2.46649100 |

**Int5e'**

|   |             |            |             |
|---|-------------|------------|-------------|
| C | -2.73349000 | 3.70290900 | -0.57878100 |
| C | -2.66268300 | 2.37487100 | -0.14175400 |
| C | -2.32314300 | 1.34384400 | -1.03023300 |
| C | -2.08052500 | 1.68363000 | -2.37232000 |
| C | -2.15809000 | 3.00645800 | -2.81534800 |
| C | -2.48193200 | 4.02708700 | -1.91454200 |
| H | -3.01208900 | 4.48287200 | 0.12571300  |
| H | -2.90022500 | 2.13631300 | 0.88855600  |
| H | -1.85966500 | 0.89509400 | -3.09022300 |
| H | -1.99098600 | 3.23634100 | -3.86461200 |
| H | -2.56292900 | 5.05542200 | -2.25621600 |

|    |             |             |             |
|----|-------------|-------------|-------------|
| C  | -2.21806800 | -0.13600500 | -0.60297200 |
| C  | -0.78034800 | -0.60493600 | -0.39841000 |
| H  | -2.63180900 | -0.70847100 | -1.43839300 |
| H  | 0.67141500  | 0.45112900  | -2.22758900 |
| C  | -0.36201100 | -0.48601800 | 0.90989500  |
| O  | 0.95666600  | -0.71495900 | 1.31196000  |
| C  | -1.16547400 | -0.15753300 | 2.00008200  |
| C  | 0.93569600  | -0.87815300 | 2.76791600  |
| C  | -0.34042900 | -0.16968000 | 3.26239000  |
| H  | 1.87287300  | -0.46218100 | 3.14749900  |
| H  | 0.90750100  | -1.95449800 | 2.97235000  |
| H  | -0.82572800 | -0.72874300 | 4.06900500  |
| H  | -0.11446200 | 0.83266900  | 3.66131300  |
| C  | -2.58724100 | -0.25243900 | 1.90350300  |
| O  | -3.36532800 | -0.24222100 | 2.87418900  |
| N  | -3.07589500 | -0.42493300 | 0.57444200  |
| C  | -4.45603900 | -0.69171100 | 0.33661600  |
| C  | -5.47425600 | 0.04669900  | 0.96189700  |
| C  | -4.82037400 | -1.71487800 | -0.55549500 |
| C  | -6.81517400 | -0.23223500 | 0.69128100  |
| H  | -5.20891700 | 0.81705500  | 1.67348500  |
| C  | -6.16218000 | -1.97795500 | -0.83575400 |
| H  | -4.04710000 | -2.32092300 | -1.01900800 |
| C  | -7.17022000 | -1.23809700 | -0.21178700 |
| H  | -7.58777700 | 0.34774000  | 1.18924700  |
| H  | -6.41753400 | -2.77519700 | -1.52888300 |
| H  | -8.21551800 | -1.44637200 | -0.42157100 |
| Na | 2.59096600  | -0.17870800 | -0.22784500 |
| C  | 0.99171300  | 3.03108300  | 1.68677000  |
| H  | 0.40145300  | 3.93548100  | 1.85881700  |
| H  | 1.53118100  | 2.76526000  | 2.59751400  |
| H  | 0.34948100  | 2.20724600  | 1.36356100  |
| S  | 2.24763200  | 3.40241100  | 0.41716800  |
| O  | 2.97859600  | 2.08085100  | 0.10556700  |
| C  | 1.11289600  | 3.70141400  | -0.97872500 |
| H  | 0.43130900  | 2.85616100  | -1.09506000 |
| H  | 0.54665800  | 4.61573000  | -0.78567300 |
| H  | 1.73319200  | 3.82907900  | -1.86795400 |
| C  | 6.22832700  | 1.50520400  | -0.46079700 |
| H  | 7.08757900  | 2.06775000  | -0.08455200 |
| H  | 5.31879100  | 2.10910000  | -0.41499000 |
| H  | 6.40364300  | 1.15016100  | -1.47970800 |
| S  | 5.92015100  | 0.07542800  | 0.63130800  |
| O  | 4.76837100  | -0.71004000 | -0.00874100 |

|   |             |             |             |
|---|-------------|-------------|-------------|
| C | 7.42443000  | -0.88227900 | 0.23594900  |
| H | 7.45069200  | -1.07672500 | -0.83905500 |
| H | 8.30602600  | -0.32249900 | 0.56022200  |
| H | 7.35599200  | -1.82322600 | 0.78470600  |
| C | 0.00754800  | -3.50703400 | -0.31100900 |
| C | 0.63881100  | -2.61041400 | -1.18612000 |
| C | 1.81269700  | -3.02415100 | -1.83472900 |
| C | 2.35139100  | -4.29345600 | -1.59741400 |
| C | 1.71690500  | -5.17591300 | -0.72126300 |
| C | 0.53891800  | -4.77746300 | -0.08191800 |
| H | -0.90043800 | -3.19666000 | 0.19679800  |
| H | 2.30210500  | -2.35316700 | -2.53227600 |
| H | 3.26532400  | -4.59112100 | -2.10454600 |
| H | 2.13254700  | -6.16309900 | -0.53941500 |
| H | 0.03316600  | -5.45463500 | 0.60098500  |
| C | -0.01150200 | -1.25739300 | -1.48933200 |
| O | 1.09558100  | -0.39300800 | -2.01726900 |
| H | -0.68766200 | -1.41591800 | -2.34170100 |

**TS5e'**

|   |             |             |             |
|---|-------------|-------------|-------------|
| C | 2.36946900  | 2.89939700  | -2.33792000 |
| C | 2.46475600  | 1.65499100  | -1.71050300 |
| C | 2.51705000  | 1.55786100  | -0.31049100 |
| C | 2.49875200  | 2.74646000  | 0.43521500  |
| C | 2.40621400  | 3.99466900  | -0.18846900 |
| C | 2.33515900  | 4.07559300  | -1.58132400 |
| H | 2.33380900  | 2.95057400  | -3.42305000 |
| H | 2.50591800  | 0.75466700  | -2.31371300 |
| H | 2.56913200  | 2.69620200  | 1.51983800  |
| H | 2.40688300  | 4.90016400  | 0.41284900  |
| H | 2.27361100  | 5.04259600  | -2.07289300 |
| C | 2.54725500  | 0.20800800  | 0.42949600  |
| C | 1.15493600  | -0.39033600 | 0.63747300  |
| H | 2.96804500  | 0.41525700  | 1.41751300  |
| H | -0.18744500 | 1.87061500  | 0.47902100  |
| C | 0.76962600  | -1.23970000 | -0.41550800 |
| O | -0.55167500 | -1.58304400 | -0.64737700 |
| C | 1.61320800  | -1.78194700 | -1.35112600 |
| C | -0.54115100 | -2.65835800 | -1.64622400 |
| C | 0.81706000  | -2.55858600 | -2.36804200 |
| H | -1.42265000 | -2.50994900 | -2.27040200 |
| H | -0.63555800 | -3.60213800 | -1.09588900 |
| H | 1.23657300  | -3.54733300 | -2.57962800 |
| H | 0.73046100  | -2.03102300 | -3.33051300 |



|    |             |             |             |
|----|-------------|-------------|-------------|
| C  | 3.04103200  | -1.63699400 | -1.24711900 |
| O  | 3.85378300  | -2.24427500 | -1.95960400 |
| N  | 3.46826200  | -0.76302000 | -0.22030700 |
| C  | 4.86200100  | -0.61772200 | 0.06067500  |
| C  | 5.79111100  | -0.31880500 | -0.94612400 |
| C  | 5.31386000  | -0.76412000 | 1.38098000  |
| C  | 7.14278100  | -0.16582800 | -0.63076800 |
| H  | 5.45189900  | -0.22576300 | -1.97003300 |
| C  | 6.66352600  | -0.59415200 | 1.69488300  |
| H  | 4.60387900  | -1.02908300 | 2.15943100  |
| C  | 7.58610100  | -0.29556300 | 0.68838900  |
| H  | 7.85179300  | 0.06063100  | -1.42249600 |
| H  | 6.99471600  | -0.71193400 | 2.72319000  |
| H  | 8.63825100  | -0.17124700 | 0.92855100  |
| Na | -2.28306000 | -0.03277800 | -0.11599400 |
| C  | -3.01952800 | 3.74464300  | -0.76379300 |
| H  | -2.99187100 | 4.81761100  | -0.55430100 |
| H  | -3.36763900 | 3.57510900  | -1.78441500 |
| H  | -2.04021000 | 3.28725600  | -0.60451600 |
| S  | -4.23038000 | 2.95145000  | 0.35280400  |
| O  | -4.15329100 | 1.44065300  | 0.06060900  |
| C  | -3.32472800 | 3.22757600  | 1.91377700  |
| H  | -2.32332200 | 2.78992500  | 1.81130000  |
| H  | -3.29155300 | 4.30363900  | 2.10913900  |
| H  | -3.89658600 | 2.72960500  | 2.69950300  |
| C  | -6.11530800 | -1.10955100 | -0.56160100 |
| H  | -7.15942600 | -1.01023800 | -0.87209100 |
| H  | -5.82689400 | -0.27627300 | 0.08233200  |
| H  | -5.94059500 | -2.06751800 | -0.06494300 |
| S  | -5.04062600 | -0.98343900 | -2.03146100 |
| O  | -3.60926600 | -1.24997500 | -1.54689100 |
| C  | -5.55461400 | -2.53721800 | -2.84763200 |
| H  | -5.34808300 | -3.37477800 | -2.17672400 |
| H  | -6.61775800 | -2.48291000 | -3.09821500 |
| H  | -4.96181200 | -2.63364400 | -3.75905900 |
| C  | -0.51781800 | -2.19208500 | 2.39509000  |
| C  | -0.69119900 | -0.79819500 | 2.36451700  |
| C  | -1.74402200 | -0.24824600 | 3.11811800  |
| C  | -2.60742600 | -1.06351000 | 3.85419900  |
| C  | -2.43369600 | -2.45054900 | 3.85845400  |
| C  | -1.38279600 | -3.00935500 | 3.12625400  |
| H  | 0.31271500  | -2.63059700 | 1.85301100  |
| H  | -1.87756800 | 0.82718200  | 3.11563400  |
| H  | -3.41117900 | -0.61400100 | 4.43176600  |

|   |             |             |            |
|---|-------------|-------------|------------|
| H | -3.10091900 | -3.08598000 | 4.43422700 |
| H | -1.22647300 | -4.08464000 | 3.13126900 |
| C | 0.29984700  | 0.08923900  | 1.65414100 |
| O | -0.84501100 | 1.37653400  | 0.98975800 |
| H | 0.79670700  | 0.75668800  | 2.35884100 |

**TS3d**

|   |             |             |             |
|---|-------------|-------------|-------------|
| C | -2.63102400 | 3.24502900  | -0.77923500 |
| C | -1.70542500 | 2.29691200  | -1.22987700 |
| C | -1.01473100 | 1.48174200  | -0.32724100 |
| C | -1.27402100 | 1.62666400  | 1.04316800  |
| C | -2.20562300 | 2.56138500  | 1.49712900  |
| C | -2.88491600 | 3.37998500  | 0.58686000  |
| H | -3.15939400 | 3.86700100  | -1.49664100 |
| H | -1.52252100 | 2.18718700  | -2.29669400 |
| H | -0.75619600 | 0.98283400  | 1.74825500  |
| H | -2.41066400 | 2.64578800  | 2.56117700  |
| H | -3.61219500 | 4.10553300  | 0.94004200  |
| C | 0.07108500  | 0.53313200  | -0.83869100 |
| C | 1.40865600  | 1.21683000  | -0.65904400 |
| H | -0.12618400 | 0.37066600  | -1.91593200 |
| H | 1.47764700  | 2.21345600  | -1.09897200 |
| C | 2.57339600  | 0.46691700  | -0.48225600 |
| O | 3.77249700  | 1.01062400  | -0.38240700 |
| C | 2.45591000  | -0.94441500 | -0.33299300 |
| C | 3.73086700  | -1.75668500 | -0.38389600 |
| C | 4.57382300  | -0.98608600 | 0.51668000  |
| H | 4.15410500  | -1.89217700 | -1.38407500 |
| H | 3.45226200  | -2.73280100 | 0.03913200  |
| H | 4.29389500  | -0.93664500 | 1.56441100  |
| H | 5.49817600  | -0.50725200 | 0.21989100  |
| C | 1.20067300  | -1.58121900 | -0.02363900 |
| O | 1.11920200  | -2.76463800 | 0.34176100  |
| N | 0.03413500  | -0.77879600 | -0.14589200 |
| C | -1.22780200 | -1.45487500 | -0.07470300 |
| C | -1.57596500 | -2.15696800 | 1.08876800  |
| C | -2.13582800 | -1.41925200 | -1.14131300 |
| C | -2.80508600 | -2.80865900 | 1.17903300  |
| H | -0.87065000 | -2.19990800 | 1.90972000  |
| C | -3.37215300 | -2.06369500 | -1.04221700 |
| H | -1.88359500 | -0.89348200 | -2.05559100 |
| C | -3.71336900 | -2.76304700 | 0.11622700  |
| H | -3.05504100 | -3.35221300 | 2.08602800  |
| H | -4.06389900 | -2.02168400 | -1.87908000 |

|    |             |             |            |
|----|-------------|-------------|------------|
| H  | -4.67278700 | -3.26673800 | 0.19119000 |
| Na | 2.82488200  | 2.51563200  | 0.90336200 |

**Int3d**

|    |             |             |             |
|----|-------------|-------------|-------------|
| C  | -2.54161800 | 3.28422400  | -0.82460600 |
| C  | -1.61890800 | 2.32108900  | -1.24862200 |
| C  | -0.98014500 | 1.48256600  | -0.32926700 |
| C  | -1.29451300 | 1.61712800  | 1.03053300  |
| C  | -2.22460800 | 2.56543600  | 1.45799900  |
| C  | -2.84818300 | 3.40976200  | 0.53138500  |
| H  | -3.02660200 | 3.92579000  | -1.55536000 |
| H  | -1.39615600 | 2.21884900  | -2.30868300 |
| H  | -0.82245800 | 0.95270300  | 1.74879300  |
| H  | -2.47285300 | 2.64039500  | 2.51359100  |
| H  | -3.57335500 | 4.14719900  | 0.86369400  |
| C  | 0.10702800  | 0.52113000  | -0.81169300 |
| C  | 1.46853000  | 1.19090000  | -0.63575600 |
| H  | -0.06595500 | 0.35962000  | -1.89341200 |
| H  | 1.61815800  | 2.05998000  | -1.27762200 |
| C  | 2.52886500  | 0.29473900  | -0.48691600 |
| O  | 3.84176100  | 0.76956400  | -0.35910400 |
| C  | 2.44652800  | -1.05135000 | -0.22911100 |
| C  | 3.80021000  | -1.57296700 | 0.17720900  |
| C  | 4.69932000  | -0.42189300 | -0.31171100 |
| H  | 4.07462800  | -2.52063200 | -0.29681800 |
| H  | 3.88151500  | -1.72573800 | 1.26670500  |
| H  | 5.54491100  | -0.18484900 | 0.33793400  |
| H  | 5.06023300  | -0.59723800 | -1.33074600 |
| C  | 1.16896600  | -1.65655300 | 0.02274700  |
| O  | 1.03603500  | -2.82013700 | 0.42109100  |
| N  | 0.03183800  | -0.79907700 | -0.12149700 |
| C  | -1.25315400 | -1.43691600 | -0.08331600 |
| C  | -1.65888000 | -2.11677400 | 1.07429400  |
| C  | -2.12295200 | -1.39367000 | -1.18125600 |
| C  | -2.90595700 | -2.73835400 | 1.12936800  |
| H  | -0.98341500 | -2.16697100 | 1.91959300  |
| C  | -3.37703000 | -2.00737500 | -1.11877200 |
| H  | -1.82644900 | -0.88493900 | -2.09201300 |
| C  | -3.77541900 | -2.68379700 | 0.03527800  |
| H  | -3.20011400 | -3.26532900 | 2.03292800  |
| H  | -4.03809600 | -1.95916400 | -1.97984000 |
| H  | -4.74917800 | -3.16287500 | 0.08246700  |
| Na | 2.63831700  | 2.22885100  | 1.19424100  |

**Int4d**

|    |             |             |             |
|----|-------------|-------------|-------------|
| C  | 3.56694100  | -1.84616100 | 2.74242700  |
| C  | 2.37755700  | -1.24051300 | 2.30904700  |
| C  | 2.26422500  | -0.71552300 | 1.01268100  |
| C  | 3.36465900  | -0.83028400 | 0.14316400  |
| C  | 4.55212300  | -1.44123300 | 0.56712900  |
| C  | 4.66094300  | -1.94630200 | 1.87345000  |
| H  | 3.63100900  | -2.24979200 | 3.75347000  |
| H  | 1.52527400  | -1.17325900 | 2.98702100  |
| H  | 3.27480900  | -0.46216100 | -0.87974000 |
| H  | 5.39004300  | -1.54021500 | -0.12600700 |
| H  | 5.58078700  | -2.42851200 | 2.20224000  |
| C  | 0.98963700  | 0.04330600  | 0.60461800  |
| C  | 1.19441200  | 1.54865600  | 0.80340300  |
| H  | 0.20763000  | -0.28756200 | 1.30302100  |
| H  | 0.91775800  | 1.93234200  | 1.78781500  |
| C  | 0.95097900  | 2.34511700  | -0.31444200 |
| O  | 1.25717300  | 3.71893600  | -0.27384200 |
| C  | 0.57729700  | 1.95070700  | -1.57367700 |
| C  | 0.68544800  | 3.11542800  | -2.52799700 |
| C  | 0.74427600  | 4.28757500  | -1.52782000 |
| H  | -0.16986400 | 3.21324000  | -3.20656300 |
| H  | 1.59092500  | 3.07212600  | -3.16024900 |
| H  | 1.41827200  | 5.09923500  | -1.80606200 |
| H  | -0.25171100 | 4.68913200  | -1.31870000 |
| C  | 0.32638700  | 0.57018200  | -1.85364600 |
| O  | -0.04368800 | 0.14735200  | -2.95749300 |
| N  | 0.55561900  | -0.32910600 | -0.77492700 |
| C  | 0.21519800  | -1.70894300 | -0.97345400 |
| C  | 0.83179100  | -2.45112700 | -1.99283800 |
| C  | -0.72793800 | -2.33944000 | -0.14746800 |
| C  | 0.51283400  | -3.79767400 | -2.17781700 |
| H  | 1.54652700  | -1.96167600 | -2.64652200 |
| C  | -1.03731300 | -3.69178300 | -0.32651900 |
| H  | -1.23544200 | -1.77412300 | 0.63079300  |
| C  | -0.41825900 | -4.42720000 | -1.34206100 |
| H  | 0.99734800  | -4.35725200 | -2.97563900 |
| H  | -1.77254000 | -4.16370200 | 0.32405000  |
| H  | -0.66055900 | -5.47794900 | -1.48341600 |
| Na | 3.22816700  | 2.86774900  | 0.81666000  |
| C  | -4.59627300 | 0.26729500  | 1.92408900  |
| C  | -3.55123900 | 0.72849500  | 1.09889300  |
| C  | -3.55642400 | 0.43904400  | -0.27605200 |
| C  | -4.60300600 | -0.30660500 | -0.82697400 |

|   |             |             |             |
|---|-------------|-------------|-------------|
| C | -5.64183000 | -0.75969400 | -0.00336200 |
| C | -5.63807100 | -0.47604200 | 1.37224000  |
| H | -4.56663600 | 0.49583600  | 2.98928200  |
| H | -2.73949300 | 0.78654400  | -0.91038900 |
| H | -4.60336700 | -0.53305100 | -1.89399700 |
| H | -6.45748100 | -1.33980800 | -0.43171600 |
| H | -6.44497600 | -0.83801400 | 2.00762300  |
| C | -2.42280600 | 1.50720700  | 1.66059100  |
| O | -2.29536700 | 1.79470500  | 2.84262800  |
| H | -1.65170700 | 1.82227000  | 0.91893900  |

**TS4d**

|   |             |             |             |
|---|-------------|-------------|-------------|
| C | 0.46905500  | 0.56199900  | 4.11376100  |
| C | 0.27998900  | 0.01014900  | 2.84606500  |
| C | 0.45531500  | 0.78036400  | 1.68629500  |
| C | 0.84522300  | 2.11708800  | 1.82991600  |
| C | 1.02992500  | 2.67647300  | 3.09893500  |
| C | 0.84072700  | 1.90377500  | 4.24624500  |
| H | 0.33511300  | -0.05706700 | 4.99685600  |
| H | -0.00810600 | -1.03410700 | 2.75308500  |
| H | 1.01801700  | 2.72956300  | 0.95176100  |
| H | 1.33263600  | 3.71656300  | 3.18633400  |
| H | 0.99315800  | 2.33650300  | 5.23100200  |
| C | 0.18579900  | 0.12632900  | 0.32205800  |
| C | -1.31893400 | 0.12415000  | 0.00248100  |
| H | 0.49734900  | -0.91543400 | 0.41022000  |
| H | -2.28810200 | -0.09524500 | 1.03153100  |
| C | -1.65627100 | 1.27087400  | -0.79046400 |
| O | -2.99770200 | 1.62658100  | -1.03691500 |
| C | -0.79505700 | 2.13971700  | -1.36579600 |
| C | -1.53720800 | 3.27519900  | -2.01906900 |
| C | -2.96593100 | 2.70006200  | -2.04492600 |
| H | -1.16694200 | 3.49549100  | -3.02414700 |
| H | -1.47992600 | 4.20461200  | -1.43567300 |
| H | -3.74826700 | 3.41418900  | -1.77775800 |
| H | -3.20053400 | 2.23877600  | -3.01072400 |
| C | 0.62582400  | 1.83537300  | -1.48030200 |
| O | 1.37996600  | 2.48252800  | -2.21711600 |
| N | 1.04415800  | 0.72379700  | -0.74702200 |
| C | 2.40200000  | 0.27257800  | -0.83189200 |
| C | 3.47881100  | 1.16343600  | -0.71872100 |
| C | 2.66261000  | -1.09336600 | -1.01176400 |
| C | 4.78998200  | 0.68927700  | -0.78427700 |
| H | 3.28697500  | 2.22159300  | -0.59761500 |

|    |             |             |             |
|----|-------------|-------------|-------------|
| C  | 3.97632700  | -1.56352500 | -1.06261200 |
| H  | 1.83732900  | -1.78967700 | -1.12022600 |
| C  | 5.04768000  | -0.67413700 | -0.95117600 |
| H  | 5.61393300  | 1.39225900  | -0.69831100 |
| H  | 4.15826600  | -2.62584900 | -1.19994000 |
| H  | 6.07016100  | -1.03804700 | -0.99581400 |
| Na | -4.56653200 | 0.44477100  | 0.09439500  |
| C  | -1.38726000 | -3.23964100 | 0.94539500  |
| C  | -1.42892800 | -2.48764600 | -0.23563700 |
| C  | -0.79330900 | -2.99344100 | -1.38051000 |
| C  | -0.12082100 | -4.21665100 | -1.34399700 |
| C  | -0.07495500 | -4.95588400 | -0.15722400 |
| C  | -0.71152700 | -4.46315700 | 0.98499000  |
| H  | -1.91104000 | -2.86325800 | 1.81760700  |
| H  | -0.82739700 | -2.42489800 | -2.30765100 |
| H  | 0.36250100  | -4.59438000 | -2.24094500 |
| H  | 0.44563600  | -5.90880900 | -0.12654600 |
| H  | -0.68933500 | -5.03602400 | 1.90823700  |
| C  | -2.15016400 | -1.15887600 | -0.29641100 |
| O  | -3.12741500 | -0.98807600 | 0.76835300  |
| H  | -2.64087100 | -1.09719300 | -1.28321000 |

**Int5d**

|   |             |             |             |
|---|-------------|-------------|-------------|
| C | -0.00628200 | -0.13725300 | 3.93295300  |
| C | 0.10134000  | 0.35362200  | 2.62705100  |
| C | -0.48192000 | -0.32158600 | 1.54359100  |
| C | -1.22307800 | -1.48945200 | 1.81422200  |
| C | -1.32360700 | -1.98820300 | 3.11801000  |
| C | -0.70641900 | -1.32037100 | 4.18338100  |
| H | 0.44690100  | 0.41118900  | 4.75444300  |
| H | 0.64004100  | 1.28187000  | 2.44590000  |
| H | -1.74299100 | -1.99008500 | 1.00241300  |
| H | -1.91309600 | -2.88209400 | 3.30697600  |
| H | -0.79725600 | -1.70145700 | 5.19620500  |
| C | -0.20732600 | 0.15708700  | 0.10349200  |
| C | 0.88162500  | -0.70978100 | -0.52304200 |
| H | 0.16459100  | 1.18145500  | 0.18847700  |
| H | 2.53865400  | -0.51267300 | 1.74216700  |
| C | 0.36914800  | -1.77678100 | -1.24510000 |
| O | 1.15139100  | -2.89959200 | -1.55975400 |
| C | -0.94215400 | -1.95196200 | -1.64908800 |
| C | -1.09744000 | -3.28701200 | -2.33036000 |
| C | 0.38080100  | -3.66357200 | -2.55143800 |
| H | -1.63879200 | -3.22473900 | -3.28008400 |

|    |             |             |             |
|----|-------------|-------------|-------------|
| H  | -1.62117700 | -4.03751600 | -1.71496800 |
| H  | 0.62197200  | -4.71763500 | -2.39666800 |
| H  | 0.73317800  | -3.35020800 | -3.54006400 |
| C  | -1.90522100 | -0.90760300 | -1.48033900 |
| O  | -3.05176400 | -0.92413300 | -1.95318000 |
| N  | -1.44068900 | 0.20964100  | -0.72455700 |
| C  | -2.30001200 | 1.33245200  | -0.50921600 |
| C  | -3.62560700 | 1.17531600  | -0.07667400 |
| C  | -1.80318500 | 2.62983000  | -0.70914500 |
| C  | -4.42836100 | 2.29479900  | 0.15057000  |
| H  | -4.02597000 | 0.17867500  | 0.05693500  |
| C  | -2.60426200 | 3.74669400  | -0.46458600 |
| H  | -0.78757900 | 2.76394400  | -1.06988700 |
| C  | -3.92389000 | 3.58497200  | -0.03441200 |
| H  | -5.45449600 | 2.15454700  | 0.47950400  |
| H  | -2.19923700 | 4.74209200  | -0.62575700 |
| H  | -4.55185100 | 4.45214500  | 0.14879000  |
| Na | 1.29719400  | -2.83303200 | 0.90703900  |
| C  | 3.94891200  | 1.35668200  | 0.37462200  |
| C  | 2.87260700  | 0.90177700  | -0.40172100 |
| C  | 2.34219100  | 1.76213000  | -1.37669700 |
| C  | 2.86123100  | 3.04525700  | -1.55864800 |
| C  | 3.92219700  | 3.49523500  | -0.76723400 |
| C  | 4.46456600  | 2.64493400  | 0.19794900  |
| H  | 4.40027300  | 0.69570100  | 1.10688100  |
| H  | 1.52087500  | 1.41315900  | -1.99584100 |
| H  | 2.43501700  | 3.69347200  | -2.31923600 |
| H  | 4.32400900  | 4.49474300  | -0.90601800 |
| H  | 5.29738000  | 2.97769100  | 0.81131700  |
| C  | 2.33172300  | -0.52097500 | -0.28508000 |
| O  | 2.79523200  | -1.12779400 | 1.03730900  |
| H  | 2.88089900  | -1.15367500 | -0.99039100 |

**TS5d**

|   |             |             |            |
|---|-------------|-------------|------------|
| C | 0.18086000  | 0.02480200  | 3.84210700 |
| C | 0.21593900  | 0.46160900  | 2.51493200 |
| C | -0.40839700 | -0.26746500 | 1.49264300 |
| C | -1.10228600 | -1.44063400 | 1.84375200 |
| C | -1.13201600 | -1.88527100 | 3.17093100 |
| C | -0.48332600 | -1.15849800 | 4.17536600 |
| H | 0.66838600  | 0.61171600  | 4.61555400 |
| H | 0.73968600  | 1.38145700  | 2.26637300 |
| H | -1.64760900 | -1.99262900 | 1.08438000 |
| H | -1.68809600 | -2.78468100 | 3.42343100 |

|    |             |             |             |
|----|-------------|-------------|-------------|
| H  | -0.51593600 | -1.49864500 | 5.20619300  |
| C  | -0.23826900 | 0.18943200  | 0.03172300  |
| C  | 0.85168900  | -0.63921500 | -0.65195300 |
| H  | 0.08233400  | 1.23041200  | 0.07495600  |
| H  | 2.93680800  | -0.53232300 | 1.73165300  |
| C  | 0.32047600  | -1.80775700 | -1.24694700 |
| O  | 1.11048000  | -2.92548100 | -1.50513300 |
| C  | -0.98934800 | -2.01585900 | -1.57286000 |
| C  | -1.16500300 | -3.39651200 | -2.15166300 |
| C  | 0.30820300  | -3.79666100 | -2.37751800 |
| H  | -1.73088100 | -3.39932700 | -3.08826500 |
| H  | -1.68127400 | -4.08398600 | -1.46409200 |
| H  | 0.55479700  | -4.82706300 | -2.11428500 |
| H  | 0.62983500  | -3.59650800 | -3.40480000 |
| C  | -1.98231300 | -0.97864200 | -1.39953600 |
| O  | -3.14135100 | -1.06653800 | -1.82147200 |
| N  | -1.52081300 | 0.16916300  | -0.72352700 |
| C  | -2.41851500 | 1.26105000  | -0.48501500 |
| C  | -3.66717000 | 1.06330800  | 0.11951400  |
| C  | -2.02979800 | 2.55986000  | -0.84029500 |
| C  | -4.50735600 | 2.15099400  | 0.36424800  |
| H  | -3.98158100 | 0.05949000  | 0.37716200  |
| C  | -2.86642100 | 3.64721900  | -0.58088900 |
| H  | -1.07464600 | 2.71618700  | -1.33262000 |
| C  | -4.11093600 | 3.44679600  | 0.02169400  |
| H  | -5.47526900 | 1.98300400  | 0.82814400  |
| H  | -2.54979800 | 4.64738700  | -0.86318000 |
| H  | -4.76668100 | 4.29027600  | 0.21721300  |
| Na | 1.51762400  | -2.74174500 | 0.94009400  |
| C  | 4.07072200  | 1.26125000  | 0.03102200  |
| C  | 2.82524500  | 0.98111000  | -0.55850800 |
| C  | 2.18962100  | 2.00847100  | -1.27941600 |
| C  | 2.75562900  | 3.28221600  | -1.37174400 |
| C  | 3.97906200  | 3.55414500  | -0.75557900 |
| C  | 4.63657600  | 2.53442900  | -0.06182600 |
| H  | 4.58729100  | 0.46682600  | 0.55717000  |
| H  | 1.26108200  | 1.79541300  | -1.79931300 |
| H  | 2.24357500  | 4.05714500  | -1.93541100 |
| H  | 4.42095900  | 4.54392900  | -0.82632800 |
| H  | 5.59829400  | 2.72740400  | 0.40567100  |
| C  | 2.23709300  | -0.40116300 | -0.56842700 |
| O  | 2.99148500  | -1.20148300 | 1.03523500  |
| H  | 2.83586800  | -1.10650900 | -1.13951700 |



**Int3b**

|    |             |             |             |
|----|-------------|-------------|-------------|
| C  | -5.23669300 | -0.85344700 | -1.46146200 |
| C  | -3.85722100 | -0.65830300 | -1.59620300 |
| C  | -3.12403700 | 0.00166900  | -0.60418400 |
| C  | -3.80032400 | 0.46997900  | 0.53221500  |
| C  | -5.17277700 | 0.26894800  | 0.67637900  |
| C  | -5.89773100 | -0.39306600 | -0.32222100 |
| H  | -5.78888600 | -1.36722000 | -2.24359600 |
| H  | -3.34587400 | -1.02810400 | -2.48220000 |
| H  | -3.24864700 | 1.00380400  | 1.30052400  |
| H  | -5.68112300 | 0.63590600  | 1.56396500  |
| H  | -6.96786200 | -0.54369600 | -0.21145600 |
| C  | -1.61177100 | 0.21475100  | -0.77311400 |
| C  | -1.20163400 | 1.66166600  | -0.71675800 |
| H  | -1.35970500 | -0.18402900 | -1.76340500 |
| H  | -1.55732700 | 2.28586100  | -1.53353800 |
| C  | -0.64268800 | 2.24561700  | 0.38563400  |
| O  | -0.32825900 | 3.51389700  | 0.49502800  |
| C  | -0.29632000 | 1.35746200  | 1.55583300  |
| C  | 0.66247000  | 1.89828700  | 2.60902400  |
| C  | -0.78564900 | 1.79055500  | 2.94621300  |
| H  | 1.04902600  | 2.89111600  | 2.40711500  |
| H  | 1.33494500  | 1.17502300  | 3.05716800  |
| H  | -1.09711400 | 0.99604600  | 3.61746300  |
| H  | -1.37381300 | 2.70279300  | 2.97041000  |
| C  | -0.23351900 | -0.12848300 | 1.32261000  |
| O  | 0.37190300  | -0.87531000 | 2.10227900  |
| N  | -0.84594400 | -0.61708200 | 0.19419200  |
| C  | -0.82915100 | -2.03577000 | -0.04310800 |
| C  | -1.50828800 | -2.91159700 | 0.80952900  |
| C  | -0.14512900 | -2.54067800 | -1.15389400 |
| C  | -1.49999200 | -4.28302200 | 0.55113200  |
| H  | -2.03192500 | -2.51511700 | 1.67218900  |
| C  | -0.14508600 | -3.91322500 | -1.41560700 |
| H  | 0.39124000  | -1.85920900 | -1.80822600 |
| C  | -0.82183300 | -4.78828700 | -0.56231600 |
| H  | -2.02856200 | -4.95721900 | 1.21883100  |
| H  | 0.38939300  | -4.29623000 | -2.28035300 |
| H  | -0.82075100 | -5.85577800 | -0.76283000 |
| Na | 1.15997900  | 3.43416400  | -1.22692100 |
| C  | 3.72261400  | -1.07197400 | 0.62674300  |
| C  | 3.94710300  | 0.00728200  | -0.24792200 |
| C  | 5.14770500  | 0.09466900  | -0.97784900 |
| C  | 6.11481700  | -0.89314200 | -0.83030300 |

|   |             |             |             |
|---|-------------|-------------|-------------|
| C | 5.88874900  | -1.96943200 | 0.04158200  |
| C | 4.69749300  | -2.06039700 | 0.76686600  |
| H | 2.78932600  | -1.13333800 | 1.18380600  |
| H | 5.29916300  | 0.93641900  | -1.64621700 |
| H | 7.04453600  | -0.83355400 | -1.38801800 |
| H | 6.64763200  | -2.73886400 | 0.15259900  |
| H | 4.52761300  | -2.89671600 | 1.43748200  |
| C | 2.89857200  | 1.01974100  | -0.37233800 |
| O | 2.94349300  | 2.00614700  | -1.11499300 |
| H | 2.01389800  | 0.85662100  | 0.26356200  |
| O | -0.39385200 | 5.04591500  | -1.57700200 |
| H | -0.65756800 | 4.61827100  | -0.70409400 |
| H | -0.73013100 | 5.94697000  | -1.60576400 |

**TS3b**

|   |             |             |             |
|---|-------------|-------------|-------------|
| C | 2.73111800  | -2.00732500 | -2.88791100 |
| C | 1.88348500  | -1.05134600 | -2.31633700 |
| C | 1.47379400  | -1.15819900 | -0.98324500 |
| C | 1.94235000  | -2.24033200 | -0.22252400 |
| C | 2.79275800  | -3.19223900 | -0.78459400 |
| C | 3.18826300  | -3.08092400 | -2.12333500 |
| H | 3.03830700  | -1.90524700 | -3.92490200 |
| H | 1.54687900  | -0.20746600 | -2.91409300 |
| H | 1.64073300  | -2.33820300 | 0.81718900  |
| H | 3.15076800  | -4.02036900 | -0.17885100 |
| H | 3.85112200  | -3.82204200 | -2.56049400 |
| C | 0.51942900  | -0.11998000 | -0.37958800 |
| C | -0.88962800 | -0.70366000 | -0.12861100 |
| H | 0.41751300  | 0.67442700  | -1.12662900 |
| H | -0.89927500 | -2.05884300 | -0.30614200 |
| C | -1.39863700 | -0.72173500 | 1.22445700  |
| O | -2.56817900 | -1.10160300 | 1.50697600  |
| C | -0.46954400 | -0.42171000 | 2.35433800  |
| C | -1.12382100 | -0.11411700 | 3.70758100  |
| C | -0.44864600 | -1.41915500 | 3.53150300  |
| H | -2.20729700 | -0.09396800 | 3.68790100  |
| H | -0.61396200 | 0.64288700  | 4.29220400  |
| H | 0.52118600  | -1.56121900 | 3.99727100  |
| H | -1.06133400 | -2.30492500 | 3.39719500  |
| C | 0.81311600  | 0.31383800  | 2.10093000  |
| O | 1.50123800  | 0.72720700  | 3.03490300  |
| N | 1.14629900  | 0.54133400  | 0.78873600  |
| C | 2.29001000  | 1.37109000  | 0.50215000  |
| C | 3.58504300  | 0.95969000  | 0.82922500  |

|    |             |             |             |
|----|-------------|-------------|-------------|
| C  | 2.08737900  | 2.60210100  | -0.12985100 |
| C  | 4.67266800  | 1.77810600  | 0.51932200  |
| H  | 3.73359800  | 0.01151900  | 1.33266400  |
| C  | 3.17860800  | 3.41493000  | -0.44639100 |
| H  | 1.07553100  | 2.92473900  | -0.35832100 |
| C  | 4.47418100  | 3.00404300  | -0.12241700 |
| H  | 5.67672800  | 1.45605400  | 0.77980100  |
| H  | 3.01380200  | 4.37160300  | -0.93374200 |
| H  | 5.32328700  | 3.63713700  | -0.36319100 |
| Na | -3.29051900 | -2.74823000 | 0.25249000  |
| C  | -2.09730200 | 2.08367300  | -1.98115400 |
| C  | -2.54739800 | 1.01230600  | -1.19587300 |
| C  | -3.63678700 | 1.22779100  | -0.33608100 |
| C  | -4.24322400 | 2.48240900  | -0.25909400 |
| C  | -3.77477700 | 3.54729300  | -1.03551800 |
| C  | -2.69754100 | 3.34386500  | -1.89916600 |
| H  | -1.27539100 | 1.92945600  | -2.67651200 |
| H  | -3.99701500 | 0.41504600  | 0.28214300  |
| H  | -5.08496700 | 2.63005200  | 0.41202400  |
| H  | -4.24926700 | 4.52230500  | -0.97123400 |
| H  | -2.33062800 | 4.15804500  | -2.51794500 |
| C  | -1.84712700 | -0.33044800 | -1.30901100 |
| O  | -2.83132800 | -1.35352000 | -1.58904300 |
| H  | -1.19893100 | -0.27140700 | -2.19256900 |
| O  | -1.32354000 | -3.25167400 | -0.59197500 |
| H  | -0.57430400 | -3.83195100 | -0.76821000 |
| H  | -2.29762400 | -2.15949100 | -1.76383200 |

**Int4b**

|   |             |             |             |
|---|-------------|-------------|-------------|
| C | 2.38648400  | -3.59764500 | 1.20534700  |
| C | 1.90590800  | -2.66167100 | 0.28151100  |
| C | 1.41178900  | -1.42252300 | 0.70367800  |
| C | 1.41196400  | -1.13319200 | 2.07813300  |
| C | 1.89903300  | -2.05833600 | 3.00205000  |
| C | 2.38534500  | -3.29830600 | 2.56810900  |
| H | 2.76493500  | -4.55467900 | 0.85708300  |
| H | 1.92381400  | -2.89596100 | -0.78050500 |
| H | 1.03006700  | -0.17513400 | 2.42147900  |
| H | 1.89992500  | -1.81417700 | 4.06100000  |
| H | 2.76063100  | -4.02004800 | 3.28789700  |
| C | 0.85738800  | -0.40775200 | -0.31478000 |
| C | -0.59525800 | -0.07009800 | -0.04986200 |
| H | 0.93389700  | -0.89393300 | -1.29715900 |
| H | -3.23656800 | 1.98846700  | 2.13547500  |

|             |             |             |             |
|-------------|-------------|-------------|-------------|
| C           | -0.98377100 | 1.12379000  | 0.51343400  |
| O           | -2.20684600 | 1.39753200  | 0.86251000  |
| C           | 0.05084700  | 2.19294900  | 0.72876300  |
| C           | -0.43543400 | 3.64025600  | 0.75118000  |
| C           | -0.01523200 | 3.00368100  | 2.03039200  |
| H           | -1.49669400 | 3.76636300  | 0.56777800  |
| H           | 0.23760500  | 4.36579000  | 0.30823100  |
| H           | 0.93979300  | 3.30000400  | 2.45215300  |
| H           | -0.78221100 | 2.69948800  | 2.73600600  |
| C           | 1.43218800  | 2.00834200  | 0.16821200  |
| O           | 2.25860300  | 2.92215500  | 0.18970200  |
| N           | 1.72686300  | 0.78480900  | -0.39202400 |
| C           | 3.02565100  | 0.59189000  | -0.98176400 |
| C           | 4.18086100  | 0.58491800  | -0.19435300 |
| C           | 3.12399700  | 0.38939300  | -2.36209900 |
| C           | 5.42670400  | 0.37488400  | -0.78768100 |
| H           | 4.09886500  | 0.75676700  | 0.87297700  |
| C           | 4.37105300  | 0.17060700  | -2.95273400 |
| H           | 2.22446800  | 0.41810100  | -2.97057200 |
| C           | 5.52575600  | 0.16302400  | -2.16611400 |
| H           | 6.32120000  | 0.37594000  | -0.17146300 |
| H           | 4.43953800  | 0.01827400  | -4.02613400 |
| H           | 6.49669300  | -0.00160800 | -2.62439900 |
| Na          | -3.75538800 | -0.10509800 | 1.33100300  |
| C           | -3.87146400 | -1.81955800 | -1.12531900 |
| C           | -2.76630000 | -0.94943600 | -1.16796200 |
| C           | -2.77569900 | 0.09614600  | -2.10134400 |
| C           | -3.85930700 | 0.27294500  | -2.96428500 |
| C           | -4.95882100 | -0.58867700 | -2.90764400 |
| C           | -4.96210700 | -1.63630900 | -1.98347700 |
| H           | -3.86551400 | -2.65355200 | -0.42943200 |
| H           | -1.93230000 | 0.77780300  | -2.13213900 |
| H           | -3.84789900 | 1.09307700  | -3.67659400 |
| H           | -5.80146800 | -0.44695300 | -3.57818200 |
| H           | -5.80397800 | -2.32193700 | -1.93789200 |
| C           | -1.56050000 | -1.20034500 | -0.25913300 |
| O           | -2.13106300 | -1.71670900 | 1.01274600  |
| H           | -1.01266800 | -2.04668600 | -0.69672900 |
| O           | -4.02817800 | 1.72494700  | 2.67210000  |
| H           | -4.49767100 | 2.52096300  | 2.94106800  |
| H           | -1.37981100 | -1.83122800 | 1.61317400  |
| <b>TS4b</b> |             |             |             |
| C           | -1.65216000 | 3.19887900  | -2.15680800 |

|    |             |             |             |
|----|-------------|-------------|-------------|
| C  | -1.25715900 | 1.87344300  | -1.95298300 |
| C  | -1.20856600 | 1.32237600  | -0.66673000 |
| C  | -1.58129000 | 2.12986300  | 0.41850200  |
| C  | -1.98133100 | 3.45366800  | 0.22145200  |
| C  | -2.01491000 | 3.99611900  | -1.06906200 |
| H  | -1.68199600 | 3.60424400  | -3.16413000 |
| H  | -0.98261400 | 1.26038100  | -2.80777300 |
| H  | -1.56490300 | 1.72663000  | 1.42624400  |
| H  | -2.27657800 | 4.05883800  | 1.07455000  |
| H  | -2.33046600 | 5.02392300  | -1.22308000 |
| C  | -0.72743300 | -0.12469800 | -0.47722100 |
| C  | 0.70464000  | -0.22349900 | 0.05609100  |
| H  | -0.74468200 | -0.58769200 | -1.46729100 |
| H  | 0.70239300  | 4.04340000  | 0.09967700  |
| C  | 0.87079300  | -0.13806900 | 1.46831400  |
| O  | 1.92700000  | 0.26424100  | 2.04326500  |
| C  | -0.28468700 | -0.54936900 | 2.32710800  |
| C  | 0.08346600  | -1.19707700 | 3.67061500  |
| C  | -0.47262800 | 0.17545000  | 3.67240800  |
| H  | 1.14716200  | -1.31358500 | 3.84510700  |
| H  | -0.56865400 | -2.00894600 | 3.97242300  |
| H  | -1.50186500 | 0.30731900  | 3.99022500  |
| H  | 0.20863000  | 1.00204500  | 3.84711800  |
| C  | -1.54767700 | -1.07611600 | 1.69915200  |
| O  | -2.41681900 | -1.62247600 | 2.37875900  |
| N  | -1.67471700 | -0.91252300 | 0.34128000  |
| C  | -2.86094100 | -1.39430900 | -0.31723000 |
| C  | -4.10062700 | -0.78600200 | -0.10159600 |
| C  | -2.75635100 | -2.47277300 | -1.20151300 |
| C  | -5.23135900 | -1.25688000 | -0.77167700 |
| H  | -4.17502200 | 0.04186600  | 0.59459500  |
| C  | -3.88794800 | -2.93696200 | -1.87611600 |
| H  | -1.79207200 | -2.95191400 | -1.34563300 |
| C  | -5.12804900 | -2.32935300 | -1.66225700 |
| H  | -6.19369000 | -0.78441300 | -0.59747600 |
| H  | -3.80147700 | -3.77805800 | -2.55793800 |
| H  | -6.00970000 | -2.69264900 | -2.18223900 |
| Na | 2.79753300  | 2.01748400  | 0.97888200  |
| C  | 3.60942400  | -1.24853600 | -2.14223600 |
| C  | 3.04682900  | -0.93476500 | -0.88766900 |
| C  | 3.74222800  | -1.35091100 | 0.26336800  |
| C  | 4.95065600  | -2.04161800 | 0.15371300  |
| C  | 5.49969300  | -2.33251100 | -1.09833600 |
| C  | 4.81895300  | -1.93334100 | -2.25124700 |

|   |            |             |             |
|---|------------|-------------|-------------|
| H | 3.08226400 | -0.95448300 | -3.04706200 |
| H | 3.33821400 | -1.13002100 | 1.24255200  |
| H | 5.46547400 | -2.35604500 | 1.05744900  |
| H | 6.44127400 | -2.86852100 | -1.17440900 |
| H | 5.22421000 | -2.16007300 | -3.23328400 |
| C | 1.73120100 | -0.23866300 | -0.91152400 |
| O | 2.43595800 | 1.63851600  | -1.17373700 |
| H | 1.33275600 | -0.23979900 | -1.92190600 |
| O | 1.63814000 | 3.80488600  | 0.07546600  |
| H | 1.74468900 | 3.15851500  | -0.67381400 |
| H | 3.02394300 | 1.60697400  | -1.93969100 |

**Int5b**

|   |             |             |             |
|---|-------------|-------------|-------------|
| C | -0.09659200 | 3.89104700  | -0.90995100 |
| C | -0.01396900 | 2.49589400  | -0.93283700 |
| C | -1.11179400 | 1.71635500  | -0.53359300 |
| C | -2.28660200 | 2.35832400  | -0.12082900 |
| C | -2.36600100 | 3.75367400  | -0.10318500 |
| C | -1.27065800 | 4.52569700  | -0.49677800 |
| H | 0.76685000  | 4.47635100  | -1.21282900 |
| H | 0.92043400  | 2.03649400  | -1.25664500 |
| H | -3.14538900 | 1.77357900  | 0.18813100  |
| H | -3.28531600 | 4.23393500  | 0.21998500  |
| H | -1.33086700 | 5.61010000  | -0.47901400 |
| C | -1.01497900 | 0.18176300  | -0.61073200 |
| C | 0.34187500  | -0.34179200 | -0.17281700 |
| H | -1.17516300 | -0.11302000 | -1.64970900 |
| C | 0.59166400  | -0.09219500 | 1.26849500  |
| O | 1.70233500  | 0.22848700  | 1.71133200  |
| C | -0.60317800 | -0.18825900 | 2.14125400  |
| C | -0.33929200 | -0.63018400 | 3.59415000  |
| C | -0.67598900 | 0.78255400  | 3.34490100  |
| H | 0.69456300  | -0.87946600 | 3.80858300  |
| H | -1.10778000 | -1.27710800 | 4.00190600  |
| H | -1.67573400 | 1.12734800  | 3.58645600  |
| H | 0.11671300  | 1.52277300  | 3.37688700  |
| C | -1.92824600 | -0.62212600 | 1.55518500  |
| O | -2.81948800 | -1.05502500 | 2.28108100  |
| N | -2.06142600 | -0.50776900 | 0.18526100  |
| C | -3.22131800 | -1.02888700 | -0.48702500 |
| C | -4.51534600 | -0.71093600 | -0.05621800 |
| C | -3.04951700 | -1.87018000 | -1.59451000 |
| C | -5.62092000 | -1.22107700 | -0.73904100 |
| H | -4.65414100 | -0.08671600 | 0.81743200  |

|    |             |             |             |
|----|-------------|-------------|-------------|
| C  | -4.15958000 | -2.36697800 | -2.28005300 |
| H  | -2.05000800 | -2.15207200 | -1.91124600 |
| C  | -5.45030100 | -2.04373000 | -1.85532700 |
| H  | -6.61991800 | -0.97011700 | -0.39487900 |
| H  | -4.01179600 | -3.01710900 | -3.13731100 |
| H  | -6.31406900 | -2.43407100 | -2.38494900 |
| Na | 3.31050400  | 1.13575000  | 0.31503100  |
| C  | 3.62770800  | -1.37277600 | -1.45530600 |
| C  | 2.46790000  | -1.63228100 | -0.69999100 |
| C  | 2.51217900  | -2.61559000 | 0.30526200  |
| C  | 3.69117300  | -3.31542900 | 0.56064800  |
| C  | 4.84437500  | -3.04149000 | -0.18176200 |
| C  | 4.80910000  | -2.06738200 | -1.18405300 |
| H  | 3.60689700  | -0.57564300 | -2.19532000 |
| H  | 1.61343400  | -2.84600200 | 0.86985300  |
| H  | 3.70785100  | -4.07811800 | 1.33373000  |
| H  | 5.76238900  | -3.58657900 | 0.01786400  |
| H  | 5.70323500  | -1.84456400 | -1.75893000 |
| C  | 1.20921500  | -0.92542600 | -1.02422500 |
| O  | 3.22817000  | 1.77084300  | -1.76875800 |
| H  | 0.94748800  | -0.91088200 | -2.08222000 |
| H  | 2.97510000  | 2.32786400  | -2.51109500 |
| O  | 5.11871700  | 2.36346900  | -0.26695400 |
| H  | 6.03172300  | 2.29926400  | -0.56336400 |
| H  | 4.47464300  | 2.25114500  | -1.08906800 |

**TS5b**

|   |             |             |             |
|---|-------------|-------------|-------------|
| C | -0.05913400 | 3.84189200  | -0.90260400 |
| C | -0.02506800 | 2.44637600  | -0.96907200 |
| C | -1.10541900 | 1.68708900  | -0.49173700 |
| C | -2.21639800 | 2.35241500  | 0.04225700  |
| C | -2.24888800 | 3.74887100  | 0.10356000  |
| C | -1.16991500 | 4.49959400  | -0.36779400 |
| H | 0.79363700  | 4.40814000  | -1.26566700 |
| H | 0.86425000  | 1.97179400  | -1.38176100 |
| H | -3.06219800 | 1.78496000  | 0.41244800  |
| H | -3.12028100 | 4.24604200  | 0.52064200  |
| H | -1.19357700 | 5.58445100  | -0.31742900 |
| C | -1.06274500 | 0.14947700  | -0.61163100 |
| C | 0.29423700  | -0.41914900 | -0.22609300 |
| H | -1.25071200 | -0.10870900 | -1.65539300 |
| C | 0.54051300  | -0.25135300 | 1.23493400  |
| O | 1.65560600  | 0.14027600  | 1.69759400  |
| C | -0.57040700 | -0.51685400 | 2.04887000  |

|    |             |             |             |
|----|-------------|-------------|-------------|
| C  | 0.43616000  | 0.39270200  | 3.82037300  |
| C  | -0.32733500 | -0.79094000 | 3.53354800  |
| H  | -0.04403400 | 1.36308400  | 3.73726200  |
| H  | 1.48407300  | 0.37433800  | 4.09482200  |
| H  | 0.17740600  | -1.73498800 | 3.74980600  |
| H  | -1.34561000 | -0.78595500 | 3.95181500  |
| C  | -1.94587600 | -0.69519800 | 1.55379600  |
| O  | -2.86129800 | -1.03593800 | 2.31055000  |
| N  | -2.12377700 | -0.51084700 | 0.18637100  |
| C  | -3.32843700 | -0.93740700 | -0.46547700 |
| C  | -4.59180300 | -0.60009200 | 0.04007000  |
| C  | -3.24025600 | -1.70818000 | -1.63437300 |
| C  | -5.74407100 | -1.01904900 | -0.62752400 |
| H  | -4.66921800 | -0.03182800 | 0.95781000  |
| C  | -4.39665300 | -2.11256400 | -2.30293700 |
| H  | -2.26823800 | -2.00956900 | -2.01233700 |
| C  | -5.65489800 | -1.76935400 | -1.80261400 |
| H  | -6.71670100 | -0.75212200 | -0.22453000 |
| H  | -4.31039500 | -2.70868100 | -3.20669100 |
| H  | -6.55519700 | -2.08824500 | -2.31914100 |
| Na | 3.17022000  | 1.12740700  | 0.26370200  |
| C  | 3.57774000  | -1.30583700 | -1.60667700 |
| C  | 2.43606100  | -1.62488500 | -0.84629000 |
| C  | 2.52506800  | -2.63821300 | 0.12562600  |
| C  | 3.72723000  | -3.31206600 | 0.34083000  |
| C  | 4.86040400  | -2.98167500 | -0.40940300 |
| C  | 4.78227500  | -1.97506500 | -1.37651700 |
| H  | 3.52912300  | -0.48164200 | -2.31510300 |
| H  | 1.64117100  | -2.91158300 | 0.69453600  |
| H  | 3.77785200  | -4.09936400 | 1.08756400  |
| H  | 5.79645100  | -3.50675800 | -0.24195400 |
| H  | 5.66121000  | -1.70523700 | -1.95474200 |
| C  | 1.15315700  | -0.94059100 | -1.12107300 |
| O  | 3.27251700  | 1.86722800  | -1.78640700 |
| H  | 0.87581000  | -0.87292100 | -2.17278200 |
| H  | 3.05868300  | 2.46728500  | -2.50715600 |
| O  | 5.01057400  | 2.40297600  | -0.09993900 |
| H  | 5.94375700  | 2.33535400  | -0.32441100 |
| H  | 4.43432700  | 2.32061400  | -0.97960700 |

**Int3c**

|   |             |             |             |
|---|-------------|-------------|-------------|
| C | -5.30575200 | -0.65563900 | -1.53854600 |
| C | -3.91213600 | -0.57992200 | -1.64553900 |
| C | -3.14010400 | -0.03604900 | -0.61339900 |



|    |             |             |             |
|----|-------------|-------------|-------------|
| C  | -3.79134400 | 0.43552500  | 0.53629900  |
| C  | -5.17860600 | 0.35301500  | 0.65247900  |
| C  | -5.94271000 | -0.19176300 | -0.38708200 |
| H  | -5.88797100 | -1.08046600 | -2.35165700 |
| H  | -3.42050300 | -0.95269200 | -2.54139400 |
| H  | -3.20711700 | 0.87766400  | 1.33817200  |
| H  | -5.66719000 | 0.72045100  | 1.55093000  |
| H  | -7.02378700 | -0.25012700 | -0.29771500 |
| C  | -1.61299300 | 0.05143300  | -0.75358900 |
| C  | -1.07912000 | 1.45309800  | -0.64015900 |
| H  | -1.37883800 | -0.32810100 | -1.75607200 |
| H  | -1.29866200 | 2.11476500  | -1.47435800 |
| C  | -0.45577000 | 1.93854500  | 0.46655800  |
| O  | -0.01258900 | 3.17180600  | 0.61481200  |
| C  | -0.21883600 | 0.99160100  | 1.61671000  |
| C  | 0.74728000  | 1.40877200  | 2.71622900  |
| C  | -0.71510600 | 1.40998100  | 3.00948800  |
| H  | 1.21966300  | 2.37398800  | 2.57143100  |
| H  | 1.34413100  | 0.61491900  | 3.15169400  |
| H  | -1.11105100 | 0.62001400  | 3.64054900  |
| H  | -1.22601100 | 2.36687800  | 3.05796000  |
| C  | -0.27534800 | -0.48516500 | 1.32773600  |
| O  | 0.27011000  | -1.30769100 | 2.07442800  |
| N  | -0.93556800 | -0.87788100 | 0.18967100  |
| C  | -1.03025500 | -2.28285800 | -0.10419600 |
| C  | -1.79824000 | -3.13014900 | 0.70008500  |
| C  | -0.36457400 | -2.80020000 | -1.22038700 |
| C  | -1.89668800 | -4.48716400 | 0.38868100  |
| H  | -2.30749100 | -2.72332300 | 1.56668000  |
| C  | -0.47135600 | -4.15727600 | -1.53534700 |
| H  | 0.24141600  | -2.14092100 | -1.83558600 |
| C  | -1.23710400 | -5.00450600 | -0.73035500 |
| H  | -2.49381000 | -5.13979800 | 1.01897300  |
| H  | 0.04950600  | -4.55099300 | -2.40359800 |
| H  | -1.31918600 | -6.06014400 | -0.97258200 |
| Na | 1.75340400  | 3.51829000  | -0.66330400 |
| C  | 3.58274700  | -1.60415900 | 0.53577900  |
| C  | 3.96653900  | -0.43839200 | -0.15252400 |
| C  | 5.18568100  | -0.39573500 | -0.85495300 |
| C  | 6.01174400  | -1.51397300 | -0.86687800 |
| C  | 5.62683100  | -2.67614100 | -0.18073100 |
| C  | 4.41715300  | -2.72258700 | 0.51775600  |
| H  | 2.63784700  | -1.63026100 | 1.07588700  |
| H  | 5.46152700  | 0.51439800  | -1.37817900 |

|   |             |             |             |
|---|-------------|-------------|-------------|
| H | 6.95406100  | -1.49002600 | -1.40588500 |
| H | 6.27582200  | -3.54730700 | -0.19384300 |
| H | 4.12352100  | -3.62473800 | 1.04498500  |
| C | 3.06437000  | 0.71408200  | -0.11438500 |
| O | 3.26810200  | 1.79493400  | -0.67565300 |
| H | 2.14422400  | 0.56995400  | 0.47382300  |
| O | 1.20011800  | 5.43713700  | -1.69649400 |
| H | 0.28104800  | 5.56130000  | -1.32497000 |
| H | 1.53727900  | 6.30338000  | -1.94656100 |
| O | -1.09364100 | 5.29998600  | -0.40179500 |
| H | -0.81552400 | 4.43344900  | 0.04552500  |
| H | -1.96599400 | 5.15609200  | -0.78633800 |

**TS3c**

|   |             |             |             |
|---|-------------|-------------|-------------|
| C | 3.67811100  | -1.52076800 | -1.92016100 |
| C | 2.47611600  | -0.82070100 | -1.76374600 |
| C | 1.85529500  | -0.72025600 | -0.51309300 |
| C | 2.46750100  | -1.33997900 | 0.58759400  |
| C | 3.66893300  | -2.03325600 | 0.44148200  |
| C | 4.28222100  | -2.12736500 | -0.81522300 |
| H | 4.14637600  | -1.57767000 | -2.89872700 |
| H | 2.02352000  | -0.33787300 | -2.62632600 |
| H | 2.00552500  | -1.27885400 | 1.56820600  |
| H | 4.13175000  | -2.49704900 | 1.30833800  |
| H | 5.22685600  | -2.65262700 | -0.92623300 |
| C | 0.54029800  | 0.05950400  | -0.37108200 |
| C | -0.68506500 | -0.84982200 | -0.13069800 |
| H | 0.38886300  | 0.56674500  | -1.32769100 |
| H | -0.36040700 | -2.15697900 | -0.29250600 |
| C | -1.20257400 | -0.89591400 | 1.22715000  |
| O | -2.18073500 | -1.61708300 | 1.55586100  |
| C | -0.51137900 | -0.12378000 | 2.30576300  |
| C | -1.28867400 | 0.05944600  | 3.61370900  |
| C | -0.14713900 | -0.88176500 | 3.60191700  |
| H | -2.29018300 | -0.35430700 | 3.60166200  |
| H | -1.14350600 | 1.02208400  | 4.09021200  |
| H | 0.77876800  | -0.56998700 | 4.07521100  |
| H | -0.35255300 | -1.94772900 | 3.58739600  |
| C | 0.38482300  | 1.02773700  | 1.94430100  |
| O | 0.77296600  | 1.82510100  | 2.79826300  |
| N | 0.69832500  | 1.15896100  | 0.61411800  |
| C | 1.48310500  | 2.29207000  | 0.19329200  |
| C | 2.81432500  | 2.44425400  | 0.59246200  |
| C | 0.89361200  | 3.24039200  | -0.64877000 |

|    |             |             |             |
|----|-------------|-------------|-------------|
| C  | 3.55256000  | 3.54131000  | 0.14443300  |
| H  | 3.26010300  | 1.71443800  | 1.25853100  |
| C  | 1.63749100  | 4.33301300  | -1.10096900 |
| H  | -0.14858200 | 3.12383700  | -0.93092200 |
| C  | 2.96910300  | 4.48518200  | -0.70578600 |
| H  | 4.58488700  | 3.65825300  | 0.46130500  |
| H  | 1.17266600  | 5.06918500  | -1.75056800 |
| H  | 3.54679200  | 5.33715400  | -1.05252600 |
| Na | -2.48141000 | -3.42906800 | 0.35304800  |
| C  | -2.56422000 | 1.51689700  | -2.00760500 |
| C  | -2.73576200 | 0.37259800  | -1.21562400 |
| C  | -3.85248200 | 0.31211500  | -0.36661800 |
| C  | -4.75575600 | 1.37419600  | -0.30258400 |
| C  | -4.56402000 | 2.51758900  | -1.08484100 |
| C  | -3.46395000 | 2.58493300  | -1.94126300 |
| H  | -1.72486400 | 1.56892700  | -2.69728200 |
| H  | -4.00593700 | -0.56485000 | 0.25010200  |
| H  | -5.61355900 | 1.30897400  | 0.36127300  |
| H  | -5.26920000 | 3.34209900  | -1.03230500 |
| H  | -3.31090700 | 3.45997200  | -2.56697800 |
| C  | -1.72270500 | -0.75488600 | -1.31050400 |
| O  | -2.41968200 | -1.99358800 | -1.53927800 |
| H  | -1.11540600 | -0.55767400 | -2.20395100 |
| O  | -0.50548700 | -3.42989300 | -0.56195800 |
| H  | 0.31497700  | -3.85380200 | -0.86250600 |
| H  | -1.69392500 | -2.66204500 | -1.62825100 |
| O  | 2.02608500  | -4.64305900 | -1.53011100 |
| H  | 2.39736300  | -5.33594300 | -0.97011600 |
| H  | 2.65403900  | -3.90555000 | -1.48114300 |

**Int4c**

|   |             |             |             |
|---|-------------|-------------|-------------|
| C | -2.08612400 | 2.57172300  | -2.84083600 |
| C | -1.59797200 | 1.34835200  | -2.36365400 |
| C | -1.40014800 | 1.13261900  | -0.99552700 |
| C | -1.72064400 | 2.17249700  | -0.10399400 |
| C | -2.22276800 | 3.38897400  | -0.57279400 |
| C | -2.40099300 | 3.59678400  | -1.94874400 |
| H | -2.23239500 | 2.71389500  | -3.90800100 |
| H | -1.37821200 | 0.54881500  | -3.06736000 |
| H | -1.59100200 | 2.02178900  | 0.96416400  |
| H | -2.48956900 | 4.17008200  | 0.13467600  |
| H | -2.79639400 | 4.54059300  | -2.31280800 |
| C | -0.81765400 | -0.20009300 | -0.48778800 |
| C | 0.62530800  | -0.06352100 | -0.03979800 |

|    |             |             |             |
|----|-------------|-------------|-------------|
| H  | -0.85381900 | -0.89036000 | -1.33937500 |
| H  | 2.59475200  | 2.09959600  | 1.98687800  |
| C  | 0.94905500  | 0.07890200  | 1.29144300  |
| O  | 2.14343800  | 0.32501300  | 1.74409400  |
| C  | -0.14196400 | -0.09226800 | 2.31812200  |
| C  | 0.29680500  | -0.50758500 | 3.72200400  |
| C  | -0.18736900 | 0.88218100  | 3.50622300  |
| H  | 1.36478900  | -0.65572900 | 3.83345100  |
| H  | -0.36649200 | -1.19694800 | 4.23223500  |
| H  | -1.17635000 | 1.13825600  | 3.87348900  |
| H  | 0.54574900  | 1.68278400  | 3.49147400  |
| C  | -1.47423900 | -0.64765400 | 1.90004400  |
| O  | -2.32111900 | -0.98304600 | 2.72954400  |
| N  | -1.69378200 | -0.78987300 | 0.54534900  |
| C  | -2.93668200 | -1.35237000 | 0.08848900  |
| C  | -4.16061800 | -0.73653600 | 0.36933200  |
| C  | -2.91035600 | -2.52719800 | -0.67104600 |
| C  | -5.34705000 | -1.29181000 | -0.11327700 |
| H  | -4.17937500 | 0.16216000  | 0.97466300  |
| C  | -4.09815100 | -3.07608800 | -1.15993700 |
| H  | -1.95963800 | -3.01538000 | -0.86588000 |
| C  | -5.32049700 | -2.45879800 | -0.88241200 |
| H  | -6.29416800 | -0.81044600 | 0.11292200  |
| H  | -4.06739600 | -3.98992300 | -1.74642600 |
| H  | -6.24571100 | -2.88694500 | -1.25713100 |
| Na | 3.87647700  | 0.92331200  | 0.52296200  |
| C  | 3.88463000  | -1.05907300 | -1.85956700 |
| C  | 2.70562300  | -1.17501000 | -1.09965200 |
| C  | 2.49920400  | -2.35252900 | -0.36860900 |
| C  | 3.44382800  | -3.38199500 | -0.38710400 |
| C  | 4.61672000  | -3.25353600 | -1.13589900 |
| C  | 4.83423000  | -2.08658800 | -1.87339500 |
| H  | 4.04793500  | -0.16429600 | -2.45286400 |
| H  | 1.59947800  | -2.44692900 | 0.23032900  |
| H  | 3.26518100  | -4.28257600 | 0.19366800  |
| H  | 5.35087700  | -4.05400200 | -1.14700500 |
| H  | 5.73590900  | -1.97821800 | -2.47035100 |
| C  | 1.65867000  | -0.05068000 | -1.13730300 |
| O  | 2.43847200  | 1.18917500  | -1.23587700 |
| H  | 1.13156600  | -0.15502900 | -2.09754700 |
| O  | 3.17525100  | 2.83693100  | 1.68338000  |
| H  | 2.60249300  | 3.37947700  | 1.11750700  |
| H  | 1.84992700  | 1.95162000  | -1.08556400 |
| O  | 1.20311600  | 3.68443100  | -0.47610000 |

|   |            |            |             |
|---|------------|------------|-------------|
| H | 1.24301400 | 4.42038600 | -1.10065800 |
| H | 0.25575000 | 3.49780900 | -0.35076200 |

**TS4c**

|    |             |             |             |
|----|-------------|-------------|-------------|
| C  | -1.63370600 | 3.03601100  | -2.29387300 |
| C  | -1.35324100 | 1.69143100  | -2.02842600 |
| C  | -1.19993400 | 1.23075200  | -0.71520400 |
| C  | -1.34569000 | 2.14895700  | 0.33620100  |
| C  | -1.63213300 | 3.49003800  | 0.07892000  |
| C  | -1.77350300 | 3.94197400  | -1.23967700 |
| H  | -1.74945900 | 3.37122800  | -3.32063900 |
| H  | -1.25739000 | 0.99183000  | -2.85531500 |
| H  | -1.23787400 | 1.81794100  | 1.36456500  |
| H  | -1.74538800 | 4.18452200  | 0.90672900  |
| H  | -2.00219800 | 4.98491200  | -1.43949000 |
| C  | -0.86721000 | -0.24712300 | -0.45929200 |
| C  | 0.55346100  | -0.47965000 | 0.05922200  |
| H  | -0.95322000 | -0.75067400 | -1.42589800 |
| H  | 3.59057500  | 4.46312100  | 1.50681800  |
| C  | 0.76183900  | -0.41875800 | 1.46347100  |
| O  | 1.88024900  | -0.17736400 | 2.01184600  |
| C  | -0.42084600 | -0.64479500 | 2.35501500  |
| C  | -0.11884400 | -1.28815200 | 3.71533300  |
| C  | -0.48135800 | 0.14761200  | 3.67465200  |
| H  | 0.92263700  | -1.54253200 | 3.87632000  |
| H  | -0.86944700 | -1.99072800 | 4.05933500  |
| H  | -1.47632400 | 0.43131700  | 4.00221200  |
| H  | 0.31000900  | 0.87817200  | 3.80863100  |
| C  | -1.75541800 | -1.01252200 | 1.76666400  |
| O  | -2.67728000 | -1.41160100 | 2.47857000  |
| N  | -1.88579700 | -0.88512900 | 0.40423100  |
| C  | -3.14069700 | -1.22092200 | -0.21608300 |
| C  | -4.29651600 | -0.48048800 | 0.04897700  |
| C  | -3.18890700 | -2.29096300 | -1.11551400 |
| C  | -5.49446200 | -0.81089700 | -0.58710800 |
| H  | -4.25482100 | 0.33942900  | 0.75698200  |
| C  | -4.38701400 | -2.61353800 | -1.75714700 |
| H  | -2.29144900 | -2.87542400 | -1.29777200 |
| C  | -5.54280100 | -1.87363300 | -1.49391700 |
| H  | -6.39080000 | -0.23563000 | -0.37415200 |
| H  | -4.41839100 | -3.44847200 | -2.45122000 |
| H  | -6.47644400 | -2.12686700 | -1.98774200 |
| Na | 3.04304900  | 1.44466800  | 1.02776500  |
| C  | 3.29156400  | -1.76199400 | -2.22402200 |

|   |            |             |             |
|---|------------|-------------|-------------|
| C | 2.77463500 | -1.44098600 | -0.95175200 |
| C | 3.40470200 | -2.00568300 | 0.17318200  |
| C | 4.50908900 | -2.84622700 | 0.02169700  |
| C | 5.01657400 | -3.14280500 | -1.24665400 |
| C | 4.39868300 | -2.59663300 | -2.37421400 |
| H | 2.80866300 | -1.35555500 | -3.10995200 |
| H | 3.03172100 | -1.78169700 | 1.16394800  |
| H | 4.97486300 | -3.27421200 | 0.90515300  |
| H | 5.87732700 | -3.79633700 | -1.35469500 |
| H | 4.77137700 | -2.82530600 | -3.36858700 |
| C | 1.56116700 | -0.57571100 | -0.92842600 |
| O | 2.48483000 | 1.17435800  | -1.11686700 |
| H | 1.14813800 | -0.49606800 | -1.93042800 |
| O | 3.09507600 | 3.68885100  | 1.22181200  |
| H | 2.61584000 | 3.92097900  | 0.37750200  |
| H | 3.13717300 | 1.02731800  | -1.81601700 |
| O | 1.83766700 | 3.74192300  | -1.10632000 |
| H | 1.97651200 | 2.75790800  | -1.24737900 |
| H | 0.88447000 | 3.89427700  | -1.16843600 |

**Int5c**

|   |             |             |             |
|---|-------------|-------------|-------------|
| C | -1.05282000 | 3.49342800  | -1.87198400 |
| C | -1.06861100 | 2.09676500  | -1.84935700 |
| C | -1.13287200 | 1.39894800  | -0.63680900 |
| C | -1.18789700 | 2.12836400  | 0.55878000  |
| C | -1.17123600 | 3.52434400  | 0.54020300  |
| C | -1.10287400 | 4.21212500  | -0.67511900 |
| H | -1.00371700 | 4.01688500  | -2.82222500 |
| H | -1.03149500 | 1.54569900  | -2.78589100 |
| H | -1.24786100 | 1.61439200  | 1.51284700  |
| H | -1.20557000 | 4.07382800  | 1.47616600  |
| H | -1.09219100 | 5.29803400  | -0.68795200 |
| C | -1.09921000 | -0.13325300 | -0.66192900 |
| C | 0.28046500  | -0.69792500 | -0.34294300 |
| H | -1.34747100 | -0.44116000 | -1.68073500 |
| H | 3.43914100  | 3.26449700  | 2.78611600  |
| C | 0.63063000  | -0.74345600 | 1.09925400  |
| O | 1.77804400  | -0.54642800 | 1.51235000  |
| C | -0.48906200 | -1.02360400 | 2.02980000  |
| C | -0.13830800 | -1.90493000 | 3.24809200  |
| C | -0.36386400 | -0.46415000 | 3.46491600  |
| H | 0.88249700  | -2.27224900 | 3.26321700  |
| H | -0.92512700 | -2.59460400 | 3.53299600  |
| H | -1.30380400 | -0.15867000 | 3.91253200  |

|    |             |             |             |
|----|-------------|-------------|-------------|
| H  | 0.49534100  | 0.17964000  | 3.62362200  |
| C  | -1.89565900 | -1.16193700 | 1.50250000  |
| O  | -2.79222900 | -1.60217700 | 2.21867600  |
| N  | -2.12144900 | -0.75908900 | 0.20740600  |
| C  | -3.45870100 | -0.85225600 | -0.32647500 |
| C  | -4.40272100 | 0.14097600  | -0.05410100 |
| C  | -3.79292100 | -1.93580600 | -1.14394300 |
| C  | -5.68305700 | 0.04839100  | -0.60409000 |
| H  | -4.13401800 | 0.97313300  | 0.58747000  |
| C  | -5.07338300 | -2.02328000 | -1.69481900 |
| H  | -3.05447900 | -2.70933500 | -1.33405000 |
| C  | -6.01970600 | -1.03070400 | -1.42593700 |
| H  | -6.41687100 | 0.81940000  | -0.38884000 |
| H  | -5.33213900 | -2.86862300 | -2.32556400 |
| H  | -7.01649800 | -1.10006700 | -1.85140600 |
| Na | 3.31831500  | 0.98630600  | 0.73836800  |
| C  | 3.51788100  | -1.32032300 | -1.94958300 |
| C  | 2.41427000  | -1.78705500 | -1.21411500 |
| C  | 2.55386300  | -2.95447900 | -0.44306500 |
| C  | 3.77248500  | -3.63076400 | -0.39405100 |
| C  | 4.87122100  | -3.14946900 | -1.11324600 |
| C  | 4.74024300  | -1.99242000 | -1.88648500 |
| H  | 3.42843500  | -0.39875800 | -2.51633800 |
| H  | 1.69871200  | -3.34107100 | 0.10365200  |
| H  | 3.86253400  | -4.53592700 | 0.19954800  |
| H  | 5.82034700  | -3.67625800 | -1.07532300 |
| H  | 5.59078000  | -1.60915900 | -2.44255500 |
| C  | 1.11407100  | -1.09252900 | -1.32859800 |
| O  | 3.67993300  | 1.91945500  | -1.16791800 |
| H  | 0.78271900  | -0.91200300 | -2.35191300 |
| O  | 2.94412100  | 2.76103400  | 2.13156800  |
| H  | 2.80912500  | 3.36748600  | 1.32540800  |
| H  | 4.41784500  | 2.09513800  | -1.76026100 |
| O  | 2.72212800  | 3.93763300  | -0.14753300 |
| H  | 3.16118100  | 3.09876300  | -0.70923300 |
| H  | 1.84192500  | 4.10911300  | -0.50371100 |

**TS5c**

|   |             |             |            |
|---|-------------|-------------|------------|
| C | -1.95765600 | 0.59271800  | 4.02579900 |
| C | -1.86407200 | 1.05235200  | 2.71006700 |
| C | -1.70997000 | 0.15669000  | 1.64420400 |
| C | -1.66431300 | -1.21588900 | 1.92121200 |
| C | -1.75741900 | -1.67927800 | 3.23530900 |
| C | -1.90136100 | -0.77699800 | 4.29282200 |

|    |             |             |             |
|----|-------------|-------------|-------------|
| H  | -2.08219100 | 1.30305600  | 4.83806500  |
| H  | -1.91887100 | 2.12016500  | 2.51135000  |
| H  | -1.56233200 | -1.92918600 | 1.10970400  |
| H  | -1.71927100 | -2.74685200 | 3.43234100  |
| H  | -1.97555700 | -1.13902700 | 5.31396200  |
| C  | -1.56985100 | 0.71293400  | 0.21943500  |
| C  | -0.10369700 | 0.84044500  | -0.19463600 |
| H  | -1.98766100 | 1.72189400  | 0.23299600  |
| H  | 4.90670200  | -3.17439000 | -1.81137600 |
| C  | 0.49882600  | -0.42917900 | -0.68919500 |
| O  | 1.69343600  | -0.76100800 | -0.44189000 |
| C  | -0.35472000 | -1.22258400 | -1.47286600 |
| C  | 0.26818600  | -2.24576300 | -2.42852500 |
| C  | 1.04968600  | -2.95845500 | -1.45443400 |
| H  | 0.84179000  | -1.80723200 | -3.24800000 |
| H  | -0.60762100 | -2.79771000 | -2.80104600 |
| H  | 0.52043000  | -3.51544400 | -0.68528300 |
| H  | 2.14061500  | -2.96509600 | -1.43143800 |
| C  | -1.81607200 | -1.07041800 | -1.53477200 |
| O  | -2.51388200 | -1.79603600 | -2.25290000 |
| N  | -2.35950200 | -0.05288200 | -0.76709900 |
| C  | -3.77337600 | 0.20030200  | -0.81381700 |
| C  | -4.69494900 | -0.78084800 | -0.43342100 |
| C  | -4.22829300 | 1.45609800  | -1.23251200 |
| C  | -6.06196600 | -0.50178000 | -0.46923900 |
| H  | -4.34014500 | -1.75725300 | -0.12533900 |
| C  | -5.59636000 | 1.73550200  | -1.25559400 |
| H  | -3.51124900 | 2.20584100  | -1.55495900 |
| C  | -6.51711900 | 0.75632100  | -0.87429300 |
| H  | -6.77230600 | -1.26945100 | -0.17663000 |
| H  | -5.94045700 | 2.71188300  | -1.58413700 |
| H  | -7.58164500 | 0.96993800  | -0.89763100 |
| Na | 3.79220900  | -0.99785500 | 0.22362900  |
| C  | 2.51264800  | 3.42211200  | 0.44448100  |
| C  | 1.91041500  | 2.42887200  | -0.35189100 |
| C  | 2.63304500  | 1.93346300  | -1.45419000 |
| C  | 3.92248700  | 2.39124000  | -1.72430000 |
| C  | 4.51965300  | 3.35315400  | -0.90226900 |
| C  | 3.80762700  | 3.86953000  | 0.18309800  |
| H  | 1.96136500  | 3.83352100  | 1.28622600  |
| H  | 2.17632700  | 1.20378800  | -2.11238400 |
| H  | 4.45953400  | 2.00356900  | -2.58545200 |
| H  | 5.52531400  | 3.70403700  | -1.11378300 |
| H  | 4.25748900  | 4.62288300  | 0.82293000  |



|   |             |             |             |
|---|-------------|-------------|-------------|
| C | 0.53362300  | 2.02015800  | -0.02986900 |
| O | 5.63259300  | -0.50479200 | 1.51673800  |
| H | -0.06072200 | 2.81873700  | 0.41520900  |
| O | 4.20016900  | -2.90385600 | -1.21512500 |
| H | 4.51845100  | -3.09514200 | -0.22471200 |
| H | 6.57239400  | -0.30354300 | 1.47326100  |
| O | 4.77542700  | -2.85141200 | 1.17871600  |
| H | 5.51671700  | -1.51835400 | 1.56227800  |
| H | 4.65314100  | -3.56141200 | 1.81569600  |

**TS3'**

|   |             |             |             |
|---|-------------|-------------|-------------|
| C | -3.77148100 | 2.20302200  | -2.02377800 |
| C | -2.64446300 | 1.38357200  | -1.89466000 |
| C | -1.90744800 | 1.35904100  | -0.70613300 |
| C | -2.32277100 | 2.17049100  | 0.35992600  |
| C | -3.44844000 | 2.98502000  | 0.23843400  |
| C | -4.17720600 | 3.00569500  | -0.95674100 |
| H | -4.33348200 | 2.20586300  | -2.95356700 |
| H | -2.34044600 | 0.75128800  | -2.72578000 |
| H | -1.76160500 | 2.16437500  | 1.29070700  |
| H | -3.75813300 | 3.60528700  | 1.07513400  |
| H | -5.05406700 | 3.63983200  | -1.05090000 |
| C | -0.64969100 | 0.48750000  | -0.59507100 |
| C | 0.60370200  | 1.34663600  | -0.51683500 |
| H | -0.60356000 | -0.10900900 | -1.51752700 |
| H | 0.51708500  | 2.23492900  | -1.13861000 |
| C | 1.20744600  | 1.60838500  | 0.74694000  |
| O | 2.00966300  | 2.57213400  | 0.93553700  |
| C | 0.93982100  | 0.66567200  | 1.86992900  |
| C | 2.08866100  | 0.37198900  | 2.84322700  |
| C | 0.98903900  | 1.25658600  | 3.29244100  |
| H | 3.03655300  | 0.83148000  | 2.58553000  |
| H | 2.11476700  | -0.64329800 | 3.22275200  |
| H | 0.26074000  | 0.84893400  | 3.98527400  |
| H | 1.17596100  | 2.32445900  | 3.33530900  |
| C | -0.05273500 | -0.44895600 | 1.68932700  |
| O | -0.22865500 | -1.28209000 | 2.57920000  |
| N | -0.76487900 | -0.48644100 | 0.51353600  |
| C | -1.77223000 | -1.50876100 | 0.36711100  |
| C | -2.97690500 | -1.41995200 | 1.07091700  |
| C | -1.54941900 | -2.58191000 | -0.49900000 |
| C | -3.95531600 | -2.40119600 | 0.90467700  |
| H | -3.13798000 | -0.58951400 | 1.74942200  |
| C | -2.53376300 | -3.55894100 | -0.67031900 |

|    |             |             |             |
|----|-------------|-------------|-------------|
| H  | -0.59977600 | -2.65626300 | -1.01742900 |
| C  | -3.73887500 | -3.47048300 | 0.03045400  |
| H  | -4.88755100 | -2.32893800 | 1.45738500  |
| H  | -2.35286100 | -4.39335000 | -1.34207600 |
| H  | -4.50264300 | -4.23189400 | -0.09928700 |
| Na | 3.34705200  | 3.28269600  | -0.60169600 |
| C  | 1.92312100  | -1.83741900 | -1.89276400 |
| C  | 2.50767700  | -0.71040300 | -1.29895500 |
| C  | 3.51964300  | -0.89951000 | -0.34616900 |
| C  | 3.91403000  | -2.18354400 | 0.02606400  |
| C  | 3.31494200  | -3.30339100 | -0.56298000 |
| C  | 2.32264600  | -3.12687500 | -1.52945700 |
| H  | 1.16787700  | -1.70224800 | -2.66392700 |
| H  | 3.99713500  | -0.02872600 | 0.09121100  |
| H  | 4.69269200  | -2.31586100 | 0.77229600  |
| H  | 3.62572800  | -4.30358500 | -0.27545600 |
| H  | 1.86678400  | -3.99071400 | -2.00559300 |
| C  | 2.11877200  | 0.66717100  | -1.75753500 |
| O  | 3.01217800  | 1.58429800  | -1.80364300 |
| H  | 1.37531800  | 0.63101100  | -2.57401300 |

**Int3'**

|   |             |             |             |
|---|-------------|-------------|-------------|
| C | 3.76788500  | -2.08747100 | -2.10735100 |
| C | 2.62058100  | -1.30022800 | -1.96941000 |
| C | 1.95603100  | -1.20483700 | -0.74035500 |
| C | 2.47094700  | -1.91256200 | 0.35572600  |
| C | 3.61684900  | -2.69898200 | 0.22297300  |
| C | 4.26995600  | -2.79047700 | -1.01047600 |
| H | 4.27148300  | -2.14282500 | -3.06832000 |
| H | 2.24144900  | -0.74852000 | -2.82641500 |
| H | 1.98256200  | -1.84458900 | 1.32361500  |
| H | 4.00218000  | -3.23769000 | 1.08426700  |
| H | 5.16374400  | -3.39912100 | -1.11205500 |
| C | 0.66992600  | -0.38001300 | -0.64015600 |
| C | -0.58867200 | -1.29024000 | -0.67971600 |
| H | 0.62441300  | 0.24834200  | -1.53619200 |
| H | -0.30147700 | -2.19995100 | -1.21663200 |
| C | -1.03390400 | -1.75125100 | 0.67636000  |
| O | -1.68745800 | -2.80197600 | 0.81436400  |
| C | -0.70472900 | -0.92811400 | 1.86370400  |
| C | -1.73226400 | -0.91855000 | 3.00916100  |
| C | -0.49035100 | -1.69234700 | 3.19340700  |
| H | -2.64753000 | -1.46291800 | 2.80307500  |
| H | -1.81958800 | 0.03659700  | 3.51458600  |

|    |             |             |             |
|----|-------------|-------------|-------------|
| H  | 0.27961000  | -1.27498700 | 3.83368200  |
| H  | -0.53655800 | -2.77316700 | 3.10860000  |
| C  | 0.11125000  | 0.32949700  | 1.71840700  |
| O  | 0.25177900  | 1.09328600  | 2.67317200  |
| N  | 0.69254000  | 0.56007300  | 0.50005500  |
| C  | 1.50517600  | 1.74640800  | 0.35140900  |
| C  | 2.85266600  | 1.73323200  | 0.72254000  |
| C  | 0.93451400  | 2.90511200  | -0.18119700 |
| C  | 3.63109300  | 2.88024800  | 0.55277400  |
| H  | 3.28358000  | 0.83325300  | 1.14708300  |
| C  | 1.71719900  | 4.04986300  | -0.35006400 |
| H  | -0.11639800 | 2.90563900  | -0.44961200 |
| C  | 3.06616300  | 4.03959900  | 0.01440200  |
| H  | 4.67716800  | 2.86751200  | 0.84492200  |
| H  | 1.26909100  | 4.95076200  | -0.75934000 |
| H  | 3.67275900  | 4.93136000  | -0.11509700 |
| Na | -3.08012900 | -3.46033800 | -0.80340300 |
| C  | -2.17883200 | 1.74133200  | -1.92843300 |
| C  | -2.36204500 | 0.58895200  | -1.15431700 |
| C  | -3.20410200 | 0.67489600  | -0.03558800 |
| C  | -3.81569200 | 1.87800400  | 0.31704800  |
| C  | -3.61371200 | 3.02500100  | -0.45980200 |
| C  | -2.79869400 | 2.95037100  | -1.59047500 |
| H  | -1.55698800 | 1.68787200  | -2.81963400 |
| H  | -3.40270600 | -0.21775200 | 0.54981200  |
| H  | -4.45686100 | 1.92321000  | 1.19358200  |
| H  | -4.09530800 | 3.96069000  | -0.19017800 |
| H  | -2.64975300 | 3.82805800  | -2.21431300 |
| C  | -1.75653700 | -0.75336900 | -1.60049400 |
| O  | -2.70520300 | -1.69306800 | -1.80345800 |
| H  | -1.18840000 | -0.51895300 | -2.53149700 |

**TS4''**

|   |            |            |             |
|---|------------|------------|-------------|
| C | 2.15433500 | 3.77589100 | -0.08851200 |
| C | 1.55097400 | 2.62340100 | 0.42647800  |
| C | 1.25710100 | 1.53672600 | -0.40237400 |
| C | 1.58369800 | 1.61926900 | -1.76271500 |
| C | 2.19160100 | 2.76224200 | -2.28059400 |
| C | 2.47744300 | 3.84735600 | -1.44398200 |
| H | 2.37323900 | 4.61129200 | 0.57051400  |
| H | 1.31269700 | 2.56849800 | 1.48617600  |
| H | 1.35794000 | 0.78325800 | -2.41944900 |
| H | 2.43820300 | 2.81055500 | -3.33761700 |

|    |             |             |             |
|----|-------------|-------------|-------------|
| H  | 2.94729300  | 4.73941100  | -1.84820500 |
| C  | 0.58741100  | 0.28099500  | 0.16924000  |
| C  | -0.78078100 | 0.03125200  | -0.46876300 |
| H  | 0.42724700  | 0.47690400  | 1.24047900  |
| H  | -1.09356600 | 0.64281200  | -1.62170900 |
| C  | -1.20098900 | -1.30258800 | -0.82264500 |
| O  | -2.38626300 | -1.60009100 | -1.13707600 |
| C  | -0.15039700 | -2.35332200 | -0.95815600 |
| C  | -0.62481300 | -3.81001500 | -0.82706200 |
| C  | -0.26007000 | -3.29774300 | -2.16782100 |
| H  | -1.67792600 | -3.92299900 | -0.59439700 |
| H  | 0.07489200  | -4.47370400 | -0.33172900 |
| H  | 0.68806100  | -3.61012900 | -2.59225200 |
| H  | -1.06118700 | -3.06397000 | -2.86127600 |
| C  | 1.24205700  | -2.10388900 | -0.45887100 |
| O  | 2.09558500  | -2.99041200 | -0.51558800 |
| N  | 1.51651600  | -0.87280400 | 0.08877700  |
| C  | 2.79604400  | -0.70628500 | 0.73598200  |
| C  | 3.95971100  | -0.53346300 | -0.01700400 |
| C  | 2.86250600  | -0.71126500 | 2.13194800  |
| C  | 5.18603800  | -0.36332000 | 0.62693100  |
| H  | 3.89828100  | -0.54097900 | -1.09936200 |
| C  | 4.08994800  | -0.53292300 | 2.77518700  |
| H  | 1.95698900  | -0.86667800 | 2.71166200  |
| C  | 5.25425700  | -0.35824200 | 2.02326900  |
| H  | 6.08866400  | -0.23323900 | 0.03704600  |
| H  | 4.13578700  | -0.53989600 | 3.86044000  |
| H  | 6.20964500  | -0.22278900 | 2.52189400  |
| Na | -3.79894600 | -0.07345100 | -1.82328300 |
| C  | -4.24184500 | 1.46699800  | 0.55130800  |
| C  | -3.02865100 | 0.78016300  | 0.73556900  |
| C  | -2.93816700 | -0.13350600 | 1.79585500  |
| C  | -4.02772400 | -0.36606600 | 2.63784300  |
| C  | -5.23440900 | 0.31197000  | 2.43699500  |
| C  | -5.33736900 | 1.23276800  | 1.39152700  |
| H  | -4.30511400 | 2.21023900  | -0.24055300 |
| H  | -2.01288700 | -0.68005800 | 1.95424800  |
| H  | -3.93724500 | -1.08456700 | 3.44784700  |
| H  | -6.08124000 | 0.12793000  | 3.09163900  |
| H  | -6.26297100 | 1.78129000  | 1.23732200  |
| C  | -1.84826500 | 1.10323500  | -0.17426000 |
| O  | -2.21985700 | 1.42015400  | -1.52865500 |
| H  | -1.33757500 | 1.96936500  | 0.28029300  |

**TS3a'**

|    |             |             |             |
|----|-------------|-------------|-------------|
| C  | -0.80018800 | 4.40085500  | -0.97125300 |
| C  | -0.70347600 | 3.02904500  | -1.22602600 |
| C  | -0.93886100 | 2.08786800  | -0.21162900 |
| C  | -1.29142100 | 2.55260800  | 1.06017000  |
| C  | -1.39648800 | 3.92147300  | 1.31637200  |
| C  | -1.14585700 | 4.85161900  | 0.30600100  |
| H  | -0.63555900 | 5.11305900  | -1.77652500 |
| H  | -0.45781400 | 2.68312400  | -2.22883800 |
| H  | -1.48747600 | 1.84107800  | 1.85703700  |
| H  | -1.67572900 | 4.26127700  | 2.31014600  |
| H  | -1.23351100 | 5.91582900  | 0.50632200  |
| C  | -0.71292600 | 0.59936700  | -0.51229700 |
| C  | 0.75954000  | 0.26145000  | -0.28521900 |
| H  | -0.91693800 | 0.46447800  | -1.58204600 |
| H  | 1.36174000  | 1.07898600  | -0.67068100 |
| C  | 1.14521200  | -0.18311400 | 1.03296700  |
| O  | 2.31610900  | -0.07043000 | 1.47388400  |
| C  | 0.12185900  | -0.91502500 | 1.82449700  |
| C  | 0.61151200  | -2.14690600 | 2.60748800  |
| C  | 0.29174900  | -0.91676400 | 3.35676700  |
| H  | 1.65295800  | -2.39910400 | 2.44336600  |
| H  | -0.09558000 | -2.96803000 | 2.63686000  |
| H  | -0.63628400 | -0.88875700 | 3.91815000  |
| H  | 1.11182100  | -0.31025600 | 3.72774000  |
| C  | -1.30283900 | -0.99628700 | 1.34849400  |
| O  | -2.12648600 | -1.66659900 | 1.96184100  |
| N  | -1.64439400 | -0.27508200 | 0.21571700  |
| C  | -3.01187900 | -0.28325800 | -0.23480700 |
| C  | -4.05508200 | 0.05766500  | 0.63395500  |
| C  | -3.30473600 | -0.60927300 | -1.56338200 |
| C  | -5.37058300 | 0.07041400  | 0.17441700  |
| H  | -3.83414600 | 0.29351300  | 1.66783300  |
| C  | -4.62260800 | -0.58466300 | -2.02168600 |
| H  | -2.50546700 | -0.88973100 | -2.24318400 |
| C  | -5.66072600 | -0.24545900 | -1.15449600 |
| H  | -6.17218600 | 0.33287500  | 0.85951300  |
| H  | -4.83435400 | -0.84120000 | -3.05614600 |
| H  | -6.68753700 | -0.23040300 | -1.50923200 |
| Na | 4.06430700  | 0.37745200  | -0.04178000 |
| C  | -0.01082500 | -2.95219500 | -1.27627300 |
| C  | 1.26037900  | -2.38410700 | -1.12130700 |
| C  | 2.29358800  | -3.18328400 | -0.61768300 |

|   |             |             |             |
|---|-------------|-------------|-------------|
| C | 2.05494600  | -4.50717600 | -0.24648500 |
| C | 0.77808700  | -5.05569300 | -0.38217500 |
| C | -0.25537200 | -4.27366000 | -0.90439600 |
| H | -0.82062700 | -2.35642100 | -1.68942300 |
| H | 3.28898400  | -2.75691300 | -0.54869200 |
| H | 2.86942800  | -5.11559100 | 0.13968000  |
| H | 0.59112100  | -6.08723800 | -0.09521900 |
| H | -1.25031000 | -4.69370900 | -1.02626100 |
| C | 1.54701000  | -0.95286300 | -1.53158700 |
| O | 2.79198000  | -0.59767400 | -1.62739000 |
| H | 0.87342600  | -0.64501700 | -2.35964500 |
| O | 4.39046200  | 1.56538100  | -2.02654900 |
| H | 3.78774200  | 0.83623200  | -2.30328600 |
| H | 3.80884400  | 2.30134100  | -1.75921600 |
| O | 2.65672500  | 3.60458500  | -0.69841900 |
| H | 2.92635400  | 4.53337700  | -0.77163900 |
| H | 1.68254700  | 3.61817000  | -0.71630200 |
| O | 3.93882800  | 2.21480600  | 1.42541300  |
| H | 3.37515200  | 2.78166500  | 0.85770700  |
| H | 3.29574000  | 1.64460400  | 1.88872800  |

### Int3a'

|   |             |             |             |
|---|-------------|-------------|-------------|
| C | 0.15390900  | 4.41143500  | -0.90892400 |
| C | -0.04016000 | 3.05683300  | -1.19858400 |
| C | -0.41981500 | 2.15177800  | -0.19585600 |
| C | -0.61351400 | 2.63858400  | 1.10180200  |
| C | -0.41915100 | 3.99001900  | 1.39616700  |
| C | -0.03177700 | 4.88185300  | 0.39504900  |
| H | 0.42127600  | 5.10095200  | -1.70631800 |
| H | 0.09379200  | 2.70005900  | -2.21795500 |
| H | -0.92416700 | 1.96036500  | 1.89075600  |
| H | -0.57569700 | 4.34638300  | 2.41066700  |
| H | 0.10866400  | 5.93482700  | 0.62275100  |
| C | -0.53639300 | 0.66283000  | -0.54067500 |
| C | 0.85081500  | -0.02541000 | -0.39981400 |
| H | -0.78981700 | 0.60089000  | -1.60373400 |
| H | 1.57262800  | 0.75374800  | -0.65906800 |
| C | 1.13206100  | -0.43134000 | 1.01961700  |
| O | 2.28183700  | -0.42268900 | 1.48038200  |
| C | -0.01008100 | -0.91893700 | 1.82288200  |
| C | 0.24623700  | -2.19493400 | 2.65453900  |
| C | 0.15337200  | -0.90567000 | 3.35883700  |
| H | 1.22287000  | -2.64135200 | 2.50468000  |

|    |             |             |             |
|----|-------------|-------------|-------------|
| H  | -0.60152100 | -2.86974500 | 2.69257100  |
| H  | -0.75755100 | -0.68804600 | 3.90640400  |
| H  | 1.06810800  | -0.44231300 | 3.71469800  |
| C  | -1.42632200 | -0.75323800 | 1.33838500  |
| O  | -2.35362400 | -1.24651200 | 1.97038500  |
| N  | -1.62610800 | 0.00386900  | 0.19836400  |
| C  | -2.97082800 | 0.30176100  | -0.22385500 |
| C  | -3.90852400 | 0.81166700  | 0.68261300  |
| C  | -3.34260700 | 0.11381900  | -1.55964500 |
| C  | -5.19718800 | 1.12331800  | 0.25421100  |
| H  | -3.63226600 | 0.94445000  | 1.72126800  |
| C  | -4.63166700 | 0.43727600  | -1.98528100 |
| H  | -2.63236800 | -0.29266300 | -2.27291800 |
| C  | -5.56484400 | 0.94185400  | -1.08054200 |
| H  | -5.91580800 | 1.51452000  | 0.96926900  |
| H  | -4.90457600 | 0.28358900  | -3.02573700 |
| H  | -6.56987000 | 1.18914300  | -1.41079300 |
| Na | 4.12541600  | -0.41910800 | -0.17474000 |
| C  | -0.73817600 | -2.83062500 | -1.31344800 |
| C  | 0.60277100  | -2.52315600 | -1.05283800 |
| C  | 1.41616300  | -3.52634900 | -0.51294900 |
| C  | 0.89652100  | -4.78389300 | -0.20160000 |
| C  | -0.44999200 | -5.06734700 | -0.43914600 |
| C  | -1.26572500 | -4.08584200 | -1.00452000 |
| H  | -1.38426100 | -2.08773200 | -1.77342300 |
| H  | 2.46941000  | -3.30790000 | -0.37299500 |
| H  | 1.54757900  | -5.54953100 | 0.21472200  |
| H  | -0.85610400 | -6.04743900 | -0.20203100 |
| H  | -2.31135800 | -4.29772300 | -1.21327900 |
| C  | 1.21809400  | -1.14547000 | -1.39086100 |
| O  | 2.56940100  | -1.20418700 | -1.51602300 |
| H  | 0.71649700  | -0.82272300 | -2.33588200 |
| O  | 4.24390300  | 0.68436800  | -2.24055800 |
| H  | 3.48164300  | 0.02656200  | -2.24653200 |
| H  | 3.83988200  | 1.52918000  | -1.97350000 |
| O  | 3.32526100  | 3.10230600  | -0.70441700 |
| H  | 3.82035900  | 3.88675200  | -0.98705600 |
| H  | 2.39618000  | 3.39099700  | -0.63824500 |
| O  | 4.50759300  | 1.37685300  | 1.25976200  |
| H  | 4.16002500  | 2.08798500  | 0.68100200  |
| H  | 3.72560400  | 1.07386500  | 1.75465400  |

**TS4a'**

|   |            |             |             |
|---|------------|-------------|-------------|
| C | 2.33632700 | -2.52518800 | -2.62300400 |
|---|------------|-------------|-------------|

|    |             |             |             |
|----|-------------|-------------|-------------|
| C  | 1.74363600  | -1.36367900 | -2.11490300 |
| C  | 1.26147700  | -1.31509500 | -0.80172200 |
| C  | 1.38684800  | -2.45883800 | 0.00099400  |
| C  | 1.98808100  | -3.61645600 | -0.49363900 |
| C  | 2.46583600  | -3.65545300 | -1.81129000 |
| H  | 2.71236400  | -2.53899900 | -3.64221100 |
| H  | 1.67103600  | -0.48008900 | -2.74425500 |
| H  | 1.01162200  | -2.44576400 | 1.02008800  |
| H  | 2.08283000  | -4.48993500 | 0.14527800  |
| H  | 2.94614700  | -4.55249000 | -2.19221100 |
| C  | 0.63942300  | -0.02464500 | -0.25208600 |
| C  | -0.87539800 | -0.14066800 | 0.03277700  |
| H  | 0.75958100  | 0.73200500  | -1.03475200 |
| H  | -1.31148800 | -1.41286000 | -0.08263900 |
| C  | -1.32395600 | 0.07240500  | 1.39052100  |
| O  | -2.52916800 | 0.23485400  | 1.71219300  |
| C  | -0.31311500 | -0.05284600 | 2.48973800  |
| C  | -0.78402000 | 0.26606400  | 3.90636800  |
| C  | -0.55762000 | -1.15395400 | 3.54368800  |
| H  | -1.80727500 | 0.61719800  | 3.97244700  |
| H  | -0.04347300 | 0.74994700  | 4.53258800  |
| H  | 0.33494000  | -1.64386800 | 3.92069300  |
| H  | -1.41715300 | -1.79100400 | 3.35973900  |
| C  | 1.12074200  | 0.29015600  | 2.20614800  |
| O  | 1.93232000  | 0.44945400  | 3.11729500  |
| N  | 1.44864000  | 0.47952200  | 0.88373200  |
| C  | 2.76309100  | 0.96862500  | 0.55308000  |
| C  | 3.91424800  | 0.24041400  | 0.86811500  |
| C  | 2.87283900  | 2.19288800  | -0.11513600 |
| C  | 5.16917600  | 0.73676000  | 0.51021700  |
| H  | 3.82369400  | -0.69875700 | 1.40086500  |
| C  | 4.12959700  | 2.68201200  | -0.47923300 |
| H  | 1.97477900  | 2.76256300  | -0.33641500 |
| C  | 5.28098300  | 1.95421000  | -0.16755200 |
| H  | 6.06076300  | 0.16976200  | 0.76192700  |
| H  | 4.20746600  | 3.63486800  | -0.99485600 |
| H  | 6.25923900  | 2.33590500  | -0.44527500 |
| Na | -4.29692200 | -0.41388600 | 0.58959800  |
| C  | -1.34325000 | 2.58547000  | -2.43544100 |
| C  | -1.80129500 | 1.95100600  | -1.27161500 |
| C  | -2.36853300 | 2.74694900  | -0.26210800 |
| C  | -2.47006400 | 4.13064600  | -0.41808200 |
| C  | -2.00505800 | 4.75001400  | -1.58265000 |
| C  | -1.43840900 | 3.97162200  | -2.59309500 |



|   |             |             |             |
|---|-------------|-------------|-------------|
| H | -0.91348700 | 1.98560300  | -3.23431500 |
| H | -2.71931400 | 2.28303800  | 0.65231100  |
| H | -2.90897900 | 4.72834900  | 0.37622300  |
| H | -2.08326000 | 5.82722000  | -1.69882600 |
| H | -1.07423400 | 4.43817500  | -3.50421000 |
| C | -1.68507400 | 0.43655900  | -1.16873800 |
| O | -2.99881600 | -0.14793500 | -1.27687500 |
| H | -1.12600900 | 0.11521500  | -2.05942500 |
| O | -2.10624100 | -2.41764800 | -0.38973000 |
| H | -1.66831300 | -3.12376800 | -0.89694900 |
| H | -2.81449000 | -1.12966100 | -1.23705500 |
| O | -0.86844600 | -4.49146200 | -2.09600900 |
| H | 0.08207100  | -4.30091900 | -2.07362100 |
| H | -1.13706700 | -4.39366500 | -3.01789900 |
| O | -4.45643900 | -2.63134900 | 0.62248000  |
| H | -3.50935000 | -2.75042000 | 0.26644000  |
| H | -4.69172700 | -3.41273800 | 1.13167500  |

**TS4'**

|   |             |             |             |
|---|-------------|-------------|-------------|
| C | -2.37146000 | 3.73986200  | -0.64204900 |
| C | -1.81017300 | 2.50282700  | -0.98183100 |
| C | -1.37822800 | 1.60943700  | 0.00632900  |
| C | -1.52720600 | 1.97991100  | 1.35403000  |
| C | -2.09378600 | 3.20774900  | 1.69720500  |
| C | -2.51528600 | 4.09601400  | 0.69922500  |
| H | -2.70210800 | 4.41642600  | -1.42542300 |
| H | -1.71721700 | 2.22533800  | -2.02955800 |
| H | -1.20096200 | 1.29594600  | 2.13258500  |
| H | -2.20993100 | 3.47322000  | 2.74472600  |
| H | -2.95562300 | 5.05188700  | 0.96845400  |
| C | -0.72650900 | 0.27010700  | -0.38945300 |
| C | 0.71639900  | 0.14983700  | 0.06153200  |
| H | -0.73193800 | 0.25228100  | -1.48591800 |
| H | 1.41149800  | 2.58748500  | 0.38905100  |
| C | 1.00154100  | -0.54632600 | 1.23435000  |
| O | 2.19230700  | -0.58320000 | 1.80390800  |
| C | -0.05050300 | -1.25673700 | 1.89510000  |
| C | 1.51672100  | -2.44875100 | 3.02685700  |
| C | 0.22370500  | -1.82055500 | 3.26633900  |
| H | 2.42774600  | -2.18009900 | 3.54621600  |
| H | 1.56832500  | -3.26730200 | 2.31698900  |
| H | -0.57319500 | -2.56012100 | 3.43273500  |
| H | 0.22855000  | -1.09221700 | 4.08499700  |
| C | -1.29076200 | -1.58774300 | 1.22805600  |

|    |             |             |             |
|----|-------------|-------------|-------------|
| O  | -2.09346400 | -2.43318900 | 1.65920100  |
| N  | -1.54408600 | -0.88907000 | 0.03799500  |
| C  | -2.75749100 | -1.12589500 | -0.68250100 |
| C  | -4.00971600 | -1.03254000 | -0.06084500 |
| C  | -2.69411700 | -1.44091300 | -2.04711600 |
| C  | -5.17545300 | -1.25029900 | -0.79729600 |
| H  | -4.06152500 | -0.80640800 | 0.99710100  |
| C  | -3.86262200 | -1.64496200 | -2.78406200 |
| H  | -1.72451500 | -1.54304800 | -2.52660800 |
| C  | -5.10979200 | -1.55141000 | -2.16087800 |
| H  | -6.13996500 | -1.17979900 | -0.30209400 |
| H  | -3.79584000 | -1.89167200 | -3.84018800 |
| H  | -6.02012100 | -1.71642100 | -2.73011600 |
| Na | 3.61801700  | 0.96553100  | 1.40022600  |
| C  | 3.02476000  | -1.16884600 | -1.31251300 |
| C  | 3.00084700  | 0.22378400  | -1.14862600 |
| C  | 4.15338900  | 0.95829400  | -1.48528400 |
| C  | 5.30318100  | 0.31203600  | -1.95657200 |
| C  | 5.31391000  | -1.07604800 | -2.11064700 |
| C  | 4.16819700  | -1.81150800 | -1.79057600 |
| H  | 2.14021800  | -1.73968500 | -1.04972500 |
| H  | 4.13804400  | 2.04098100  | -1.40040400 |
| H  | 6.18042300  | 0.89758200  | -2.21834100 |
| H  | 6.20203800  | -1.57915900 | -2.48191400 |
| H  | 4.16587000  | -2.89155100 | -1.90695200 |
| C  | 1.72554300  | 0.94154000  | -0.69365300 |
| O  | 2.21123800  | 2.15278200  | 0.05721900  |
| H  | 1.24945800  | 1.34463200  | -1.59742000 |

**Int5'**

|   |             |             |             |
|---|-------------|-------------|-------------|
| C | -1.71451800 | 3.76063300  | -1.48231200 |
| C | -1.33689700 | 2.41523700  | -1.54247000 |
| C | -1.40028000 | 1.58745800  | -0.40947100 |
| C | -1.88758100 | 2.13858800  | 0.78641400  |
| C | -2.26235200 | 3.48308200  | 0.85114500  |
| C | -2.17222900 | 4.30285700  | -0.27856200 |
| H | -1.66852600 | 4.37595900  | -2.37706800 |
| H | -1.00757000 | 1.99633800  | -2.49214300 |
| H | -1.97861300 | 1.51287800  | 1.66735300  |
| H | -2.63821200 | 3.88916800  | 1.78668000  |
| H | -2.47485600 | 5.34481200  | -0.22597700 |
| C | -0.87245600 | 0.14341800  | -0.50630400 |
| C | 0.61174900  | 0.05451300  | -0.15239400 |
| H | -0.97736100 | -0.14476800 | -1.55734400 |

|             |             |             |             |
|-------------|-------------|-------------|-------------|
| H           | 1.28412300  | 2.39520300  | -1.04988800 |
| C           | 0.82461900  | -0.23242300 | 1.18771300  |
| O           | 2.07355500  | -0.08156800 | 1.82920300  |
| C           | -0.12630900 | -0.68157700 | 2.08513800  |
| C           | 1.96825500  | -0.78425000 | 3.11683900  |
| C           | 0.47120500  | -0.81273600 | 3.45992100  |
| H           | 2.59715900  | -0.24138300 | 3.82739600  |
| H           | 2.36923100  | -1.79270400 | 2.96530100  |
| H           | 0.19114800  | -1.74629700 | 3.95818400  |
| H           | 0.19822200  | 0.01259900  | 4.13717700  |
| C           | -1.42377200 | -1.09385300 | 1.64368500  |
| O           | -2.25373400 | -1.68231000 | 2.35544700  |
| N           | -1.69306200 | -0.81474700 | 0.27693300  |
| C           | -2.90959100 | -1.26465100 | -0.32147300 |
| C           | -4.15684800 | -1.03710800 | 0.27908900  |
| C           | -2.86405900 | -1.94070800 | -1.55104400 |
| C           | -5.32717700 | -1.47453700 | -0.34415400 |
| H           | -4.20032300 | -0.53769300 | 1.23829400  |
| C           | -4.03768500 | -2.36147500 | -2.17894700 |
| H           | -1.90112800 | -2.15263200 | -2.00749500 |
| C           | -5.27772500 | -2.13161200 | -1.57676900 |
| H           | -6.28465000 | -1.29422400 | 0.13710200  |
| H           | -3.97970700 | -2.88385700 | -3.13017000 |
| H           | -6.19225400 | -2.46477400 | -2.05909900 |
| Na          | 3.27361500  | 1.47075400  | 0.79278700  |
| C           | 2.90946100  | -1.76421300 | -0.83326000 |
| C           | 2.91269200  | -0.41177100 | -1.21005600 |
| C           | 4.10968500  | 0.14095100  | -1.70256200 |
| C           | 5.27415800  | -0.63279500 | -1.79100900 |
| C           | 5.25772000  | -1.97390500 | -1.40378900 |
| C           | 4.06782600  | -2.53676500 | -0.93088300 |
| H           | 1.98820700  | -2.20061200 | -0.46126000 |
| H           | 4.11718200  | 1.17071700  | -2.04603300 |
| H           | 6.18619900  | -0.18824800 | -2.18027400 |
| H           | 6.15787500  | -2.57713300 | -1.47806300 |
| H           | 4.04070500  | -3.58154200 | -0.63450500 |
| C           | 1.61717400  | 0.40324000  | -1.16401600 |
| O           | 2.09891800  | 1.86886200  | -1.06106000 |
| H           | 1.15984400  | 0.35567500  | -2.16028500 |
| <b>TS5'</b> |             |             |             |
| C           | -1.75497400 | 3.86901400  | -0.91685500 |
| C           | -1.35476200 | 2.55557100  | -1.18034800 |

|    |             |             |             |
|----|-------------|-------------|-------------|
| C  | -1.34774800 | 1.58077200  | -0.17135100 |
| C  | -1.78153100 | 1.95039100  | 1.11105300  |
| C  | -2.18139500 | 3.26177600  | 1.37909100  |
| C  | -2.16520900 | 4.22881800  | 0.36898300  |
| H  | -1.75836900 | 4.60350700  | -1.71763600 |
| H  | -1.05380700 | 2.28229300  | -2.18976700 |
| H  | -1.81672300 | 1.20927400  | 1.90228700  |
| H  | -2.51704200 | 3.52606900  | 2.37839500  |
| H  | -2.48423600 | 5.24580500  | 0.57835000  |
| C  | -0.82477900 | 0.17190200  | -0.49710200 |
| C  | 0.65970400  | -0.00434100 | -0.16280600 |
| H  | -0.92734600 | 0.05095000  | -1.57910300 |
| H  | 1.33815100  | 2.68012400  | -0.68211900 |
| C  | 0.85629600  | -0.48366600 | 1.14890600  |
| O  | 2.07047000  | -0.35502700 | 1.83968600  |
| C  | -0.09620500 | -1.07913800 | 1.92760900  |
| C  | 1.96145300  | -1.20386600 | 3.03518100  |
| C  | 0.45545300  | -1.38384500 | 3.29478600  |
| H  | 2.50992900  | -0.70227200 | 3.83574900  |
| H  | 2.44954200  | -2.15490400 | 2.79546800  |
| H  | 0.22277900  | -2.39809400 | 3.63314100  |
| H  | 0.08680900  | -0.69114600 | 4.06628500  |
| C  | -1.40445800 | -1.40248900 | 1.40525700  |
| O  | -2.22890900 | -2.09742700 | 2.01344700  |
| N  | -1.66091200 | -0.89470800 | 0.11880300  |
| C  | -2.89438700 | -1.20596900 | -0.53864900 |
| C  | -4.13210000 | -0.98782500 | 0.08098200  |
| C  | -2.86355600 | -1.72677100 | -1.84005100 |
| C  | -5.31617900 | -1.28241400 | -0.59751600 |
| H  | -4.15996300 | -0.60593700 | 1.09379700  |
| C  | -4.05004200 | -2.00573000 | -2.52103700 |
| H  | -1.90533100 | -1.92721900 | -2.31113900 |
| C  | -5.28289500 | -1.78585500 | -1.90088000 |
| H  | -6.26930300 | -1.11308300 | -0.10428900 |
| H  | -4.00888400 | -2.40881800 | -3.52918200 |
| H  | -6.20722800 | -2.00946800 | -2.42574500 |
| Na | 3.19111000  | 1.44789900  | 1.05408300  |
| C  | 3.17463100  | -1.54636900 | -0.85127200 |
| C  | 3.00715500  | -0.18597500 | -1.16757600 |
| C  | 4.11423700  | 0.51630900  | -1.68426500 |
| C  | 5.34970800  | -0.11748300 | -1.85318900 |
| C  | 5.50389900  | -1.46562800 | -1.51904500 |
| C  | 4.40875600  | -2.17734900 | -1.02113300 |
| H  | 2.32383700  | -2.11172900 | -0.48653000 |

|   |            |             |             |
|---|------------|-------------|-------------|
| H | 3.98631300 | 1.55930800  | -1.95228000 |
| H | 6.18821500 | 0.44268800  | -2.25819200 |
| H | 6.46197600 | -1.95891800 | -1.65590200 |
| H | 4.51076900 | -3.22992600 | -0.77198200 |
| C | 1.64492500 | 0.45905000  | -1.06050800 |
| O | 2.18173500 | 2.20647600  | -0.67987800 |
| H | 1.25173400 | 0.72203700  | -2.04177300 |

**TS4a-1**

|   |             |             |             |
|---|-------------|-------------|-------------|
| C | -2.27084300 | 2.52364700  | -3.00692600 |
| C | -1.84157500 | 1.31089100  | -2.45570800 |
| C | -1.63403900 | 1.17336200  | -1.07704900 |
| C | -1.88791200 | 2.28414800  | -0.25169200 |
| C | -2.32283300 | 3.49564700  | -0.79760200 |
| C | -2.51082300 | 3.62300500  | -2.18054300 |
| H | -2.43076600 | 2.60200800  | -4.07881700 |
| H | -1.67780500 | 0.45598400  | -3.10775000 |
| H | -1.75698400 | 2.19234000  | 0.82233000  |
| H | -2.52890700 | 4.33680300  | -0.14086200 |
| H | -2.85849200 | 4.56188000  | -2.60172500 |
| C | -1.10402200 | -0.15490000 | -0.50511200 |
| C | 0.38280700  | -0.11076000 | -0.19757100 |
| H | -1.25528100 | -0.89909600 | -1.29497900 |
| H | 2.43050000  | 2.02380800  | 1.56264800  |
| C | 0.77794900  | 0.14123100  | 1.10340500  |
| O | 2.04660400  | 0.31628200  | 1.47104100  |
| C | -0.20578000 | 0.24034800  | 2.14090800  |
| C | 1.43807400  | -0.11604600 | 3.66960700  |
| C | 0.23854100  | 0.69763000  | 3.50917200  |
| H | 2.43123700  | 0.28824700  | 3.81970500  |
| H | 1.32807000  | -1.19482300 | 3.69831600  |
| H | -0.56594400 | 0.38325400  | 4.18958400  |
| H | 0.41474200  | 1.77305600  | 3.61742100  |
| C | -1.52824100 | -0.31938300 | 1.97665400  |
| O | -2.30068500 | -0.54293600 | 2.92484000  |
| N | -1.90230400 | -0.61325000 | 0.65305600  |
| C | -3.20109600 | -1.14639200 | 0.37594500  |
| C | -4.36369300 | -0.54797400 | 0.88117700  |
| C | -3.31798900 | -2.28586200 | -0.43310900 |
| C | -5.61671000 | -1.08276400 | 0.57721400  |
| H | -4.27871800 | 0.31875000  | 1.52449100  |
| C | -4.57385100 | -2.80957000 | -0.74649100 |
| H | -2.42089400 | -2.77375400 | -0.80365400 |

|    |             |             |             |
|----|-------------|-------------|-------------|
| C  | -5.73042000 | -2.21037000 | -0.24091400 |
| H  | -6.50872300 | -0.61159800 | 0.98068600  |
| H  | -4.64502000 | -3.69447200 | -1.37299800 |
| H  | -6.70809000 | -2.62047700 | -0.47711100 |
| Na | 3.82352400  | 0.25806700  | 0.11664000  |
| C  | 3.32962100  | -1.79629000 | -2.03358800 |
| C  | 2.19789600  | -1.63484800 | -1.21259400 |
| C  | 1.84935700  | -2.67864700 | -0.34446900 |
| C  | 2.61195900  | -3.84888400 | -0.29025200 |
| C  | 3.73982500  | -3.99634600 | -1.10190400 |
| C  | 4.09667600  | -2.96489900 | -1.97523800 |
| H  | 3.59939900  | -1.00568500 | -2.72765600 |
| H  | 0.98106800  | -2.56063500 | 0.29608400  |
| H  | 2.32513000  | -4.64368700 | 0.39259300  |
| H  | 4.33200200  | -4.90584200 | -1.05740000 |
| H  | 4.96530100  | -3.07150200 | -2.61947500 |
| C  | 1.34150200  | -0.36205200 | -1.32756100 |
| O  | 2.29795400  | 0.72337500  | -1.56355600 |
| H  | 0.75441800  | -0.46765000 | -2.25213300 |
| O  | 2.83042400  | 2.92314800  | 1.43164200  |
| H  | 2.33072900  | 3.30646800  | 0.69021100  |
| H  | 1.83005600  | 1.57367800  | -1.46211500 |
| O  | 1.17482700  | 3.34768900  | -0.96954900 |
| H  | 1.17282700  | 4.04783800  | -1.63535800 |
| H  | 0.23742900  | 3.17605200  | -0.76586400 |
| O  | 5.19431800  | 1.93218700  | 0.75005600  |
| H  | 4.44455100  | 2.50553800  | 1.06866400  |
| H  | 6.00172700  | 2.21602700  | 1.19038200  |

**Int5a-1**

|   |             |            |             |
|---|-------------|------------|-------------|
| C | -2.74475300 | 3.22880100 | -2.15337400 |
| C | -2.13421500 | 1.98675700 | -1.95698100 |
| C | -1.91698000 | 1.47596100 | -0.66798600 |
| C | -2.36458800 | 2.23173600 | 0.42751800  |
| C | -2.97157200 | 3.47600300 | 0.23696000  |
| C | -3.15896500 | 3.98501800 | -1.05266600 |
| H | -2.90763900 | 3.59793600 | -3.16245600 |
| H | -1.82072300 | 1.40403600 | -2.82081400 |
| H | -2.23370300 | 1.84958400 | 1.43386000  |
| H | -3.30761400 | 4.04532500 | 1.09946900  |
| H | -3.64025700 | 4.94797700 | -1.19805200 |
| C | -1.14994100 | 0.15388200 | -0.50954100 |
| C | 0.36116000  | 0.36354300 | -0.29324700 |

|    |             |             |             |
|----|-------------|-------------|-------------|
| H  | -1.27015300 | -0.37232500 | -1.46066900 |
| H  | 3.57303500  | 4.42380400  | 0.70893600  |
| C  | 0.69725400  | 0.32168600  | 1.06690000  |
| O  | 1.99339400  | 0.58424200  | 1.52160300  |
| C  | -0.15163600 | 0.04233500  | 2.11327700  |
| C  | 2.02741800  | 0.23299400  | 2.94677600  |
| C  | 0.56413800  | 0.22913200  | 3.42488400  |
| H  | 2.66785700  | 0.96887400  | 3.43980500  |
| H  | 2.48238700  | -0.76129500 | 3.02350900  |
| H  | 0.36805200  | -0.58495400 | 4.12915000  |
| H  | 0.30451400  | 1.17105600  | 3.93147800  |
| C  | -1.40720800 | -0.62035700 | 1.88670600  |
| O  | -2.09623500 | -1.12996500 | 2.78361200  |
| N  | -1.77435400 | -0.72173500 | 0.52300000  |
| C  | -2.95060200 | -1.43864900 | 0.14372800  |
| C  | -4.18314900 | -1.22662200 | 0.77918400  |
| C  | -2.88054500 | -2.36674800 | -0.90703600 |
| C  | -5.31633200 | -1.92909600 | 0.36514000  |
| H  | -4.24123700 | -0.52848700 | 1.60423500  |
| C  | -4.01998200 | -3.05421900 | -1.32921100 |
| H  | -1.92486400 | -2.56029000 | -1.38649300 |
| C  | -5.24535300 | -2.84018300 | -0.69260100 |
| H  | -6.26254000 | -1.75653500 | 0.87080700  |
| H  | -3.94437700 | -3.76774500 | -2.14536000 |
| H  | -6.13207200 | -3.37915700 | -1.01381600 |
| Na | 3.65491200  | 1.38465100  | 0.15442200  |
| C  | 3.29650700  | -1.64697700 | -1.82923300 |
| C  | 2.09432100  | -1.39362200 | -1.14355100 |
| C  | 1.58031800  | -2.39578500 | -0.30886800 |
| C  | 2.25692200  | -3.60866300 | -0.14387200 |
| C  | 3.46138000  | -3.84408900 | -0.81074900 |
| C  | 3.97790800  | -2.85869900 | -1.65988200 |
| H  | 3.68899700  | -0.89381900 | -2.50470400 |
| H  | 0.64776300  | -2.22433300 | 0.21901200  |
| H  | 1.83832600  | -4.36825800 | 0.51021200  |
| H  | 3.98433600  | -4.78769500 | -0.68385300 |
| H  | 4.89707500  | -3.04115000 | -2.21154500 |
| C  | 1.31745600  | -0.09059400 | -1.37336700 |
| O  | 2.34523200  | 0.91621800  | -1.70035900 |
| H  | 0.72894100  | -0.23746600 | -2.29052900 |
| O  | 3.36659600  | 3.63619000  | 0.19506400  |
| H  | 2.42559300  | 3.70904800  | -0.09937000 |
| H  | 1.87492200  | 1.74069300  | -1.91083600 |
| O  | 0.89027700  | 3.22245500  | -0.78316500 |

|   |            |             |             |
|---|------------|-------------|-------------|
| H | 0.09215900 | 3.74216600  | -0.95219900 |
| H | 0.57263300 | 2.31898400  | -0.47497500 |
| O | 5.31231500 | -0.20737800 | 0.23785100  |
| H | 4.96948900 | -1.01180500 | -0.18914700 |
| H | 6.05915200 | -0.47852400 | 0.78440100  |

**TS5a-1**

|   |             |             |             |
|---|-------------|-------------|-------------|
| C | -1.02706400 | 3.42610800  | -2.28430700 |
| C | -0.74687300 | 2.09864100  | -1.95627900 |
| C | -1.47541600 | 1.42691300  | -0.96202500 |
| C | -2.50745200 | 2.12087200  | -0.31695300 |
| C | -2.78612400 | 3.45624300  | -0.63576600 |
| C | -2.04658200 | 4.11654300  | -1.61947900 |
| H | -0.44500900 | 3.92443700  | -3.05489600 |
| H | 0.06979400  | 1.58534200  | -2.45360700 |
| H | -3.10162700 | 1.62327800  | 0.43999400  |
| H | -3.58929000 | 3.97305800  | -0.11729900 |
| H | -2.26607500 | 5.15008100  | -1.87184100 |
| C | -1.15394600 | -0.05763100 | -0.66211300 |
| C | 0.30722300  | -0.35710400 | -0.32698300 |
| H | -1.40068500 | -0.60510400 | -1.57470800 |
| H | 2.12825700  | 2.39097300  | -1.02941400 |
| C | 0.58125600  | -0.08927600 | 1.02636800  |
| O | 1.86111400  | -0.02304000 | 1.54593900  |
| C | -0.38676500 | 0.13100500  | 1.98522000  |
| C | 1.75327500  | 0.36223600  | 2.96340100  |
| C | 0.26457200  | 0.22988800  | 3.34672100  |
| H | 2.11008700  | 1.39429500  | 3.03825400  |
| H | 2.42187000  | -0.29646300 | 3.52176800  |
| H | 0.06923300  | -0.66980800 | 3.94459700  |
| H | -0.06847800 | 1.08712300  | 3.94125900  |
| C | -1.74313200 | -0.33028700 | 1.75126800  |
| O | -2.54724200 | -0.54881400 | 2.66617400  |
| N | -2.04658800 | -0.59132300 | 0.39982000  |
| C | -3.24670500 | -1.26549300 | 0.02125700  |
| C | -4.48937700 | -0.94309300 | 0.59037200  |
| C | -3.19221900 | -2.28102100 | -0.94854600 |
| C | -5.64384900 | -1.61453700 | 0.18332200  |
| H | -4.54285300 | -0.18844800 | 1.36353400  |
| C | -4.35264900 | -2.93645900 | -1.36235400 |
| H | -2.23420800 | -2.57440800 | -1.36706500 |
| C | -5.58758100 | -2.60719300 | -0.79819300 |
| H | -6.59549100 | -1.35250600 | 0.63744000  |
| H | -4.28515300 | -3.71793000 | -2.11426900 |



|    |             |             |             |
|----|-------------|-------------|-------------|
| H  | -6.49068900 | -3.12129300 | -1.11373900 |
| Na | 3.47858600  | 0.67601000  | 0.02238400  |
| C  | 3.49391900  | -1.95898200 | -1.68142500 |
| C  | 2.29770700  | -1.83164200 | -0.95008300 |
| C  | 2.04307200  | -2.78168200 | 0.05567100  |
| C  | 2.95726700  | -3.79883100 | 0.33798900  |
| C  | 4.14715200  | -3.90132600 | -0.38639700 |
| C  | 4.40900600  | -2.97805900 | -1.40168800 |
| H  | 3.71397200  | -1.25430600 | -2.47518500 |
| H  | 1.11355700  | -2.72432900 | 0.61099600  |
| H  | 2.73257500  | -4.51561600 | 1.12269600  |
| H  | 4.85670300  | -4.69430900 | -0.16895200 |
| H  | 5.32361200  | -3.05113200 | -1.98360300 |
| C  | 1.23509100  | -0.80707900 | -1.29414500 |
| O  | 2.24342100  | 0.62111100  | -1.87166500 |
| H  | 0.77675500  | -1.01727300 | -2.26127100 |
| O  | 2.44996500  | 2.92571200  | -0.27493400 |
| H  | 1.66643200  | 3.13182800  | 0.28407300  |
| H  | 2.43083600  | 0.53404200  | -2.81724500 |
| O  | 0.24115000  | 3.27556500  | 1.38126600  |
| H  | -0.47488700 | 3.75107500  | 0.93519800  |
| H  | -0.11423400 | 2.37327600  | 1.51077200  |
| O  | 4.95506700  | 2.35123900  | 0.47167000  |
| H  | 5.78674500  | 2.82900300  | 0.39105100  |
| H  | 4.21928500  | 2.95156200  | 0.21974900  |

**TS5a''**

|   |             |             |             |
|---|-------------|-------------|-------------|
| C | -2.27721400 | 2.99420900  | 2.01336500  |
| C | -1.80366700 | 1.93799900  | 1.23429800  |
| C | -1.73955600 | 2.06567200  | -0.16258600 |
| C | -2.16192500 | 3.26389800  | -0.74930900 |
| C | -2.63098500 | 4.32174500  | 0.03182100  |
| C | -2.68898500 | 4.18944100  | 1.41876100  |
| H | -2.33247800 | 2.87727200  | 3.09286300  |
| H | -1.51571700 | 1.00933700  | 1.72434500  |
| H | -2.12126800 | 3.37230400  | -1.83103900 |
| H | -2.95518200 | 5.24279600  | -0.44535700 |
| H | -3.05858000 | 5.00726400  | 2.03183700  |
| C | -1.17872300 | 0.96682600  | -1.05478000 |
| C | 0.36448500  | 0.90689400  | -1.09549800 |
| H | -1.48373000 | 1.20809600  | -2.08833000 |
| C | 0.94254900  | -0.28349200 | -1.80893200 |
| O | 2.12959200  | -0.32181400 | -2.19925000 |
| C | 0.04816000  | -1.38656800 | -1.97369300 |

|   |             |             |             |
|---|-------------|-------------|-------------|
| C | 0.51704700  | -2.60180700 | -2.76703400 |
| C | 1.03029500  | -3.42543500 | -1.67749000 |
| H | 1.27498500  | -2.32695200 | -3.50035700 |
| H | -0.35461400 | -3.08368800 | -3.22804200 |
| H | 0.31425900  | -3.88017700 | -1.00236700 |
| H | 2.04163400  | -3.81360000 | -1.67484600 |
| C | -1.26023600 | -1.49457500 | -1.37759600 |
| O | -1.90968400 | -2.55474600 | -1.39136800 |
| N | -1.76740200 | -0.35983600 | -0.70863200 |
| C | -3.20646000 | -0.39157300 | -0.50283000 |
| C | -3.72315800 | -0.71645100 | 0.75238100  |
| C | -4.06956600 | -0.11073200 | -1.56603100 |
| C | -5.10687300 | -0.75653900 | 0.93733300  |
| H | -3.03869100 | -0.92103300 | 1.57337500  |
| C | -5.44991800 | -0.14478700 | -1.37288400 |
| H | -3.66195600 | 0.12145900  | -2.54642100 |
| C | -5.97199600 | -0.46922800 | -0.11912500 |
| H | -5.50847500 | -1.01069900 | 1.91501200  |
| H | -6.11635200 | 0.07365000  | -2.20320400 |
| H | -7.04794000 | -0.49944300 | 0.03165100  |
| C | 3.29180500  | -3.05281900 | 2.21815700  |
| H | 4.32887500  | -3.10122300 | 2.56533900  |
| H | 2.82873800  | -4.04027100 | 2.28395900  |
| H | 2.70794800  | -2.31116800 | 2.77601500  |
| S | 3.29960800  | -2.58703900 | 0.45785000  |
| O | 1.79878500  | -2.40295600 | 0.07379600  |
| C | 3.95303700  | -0.89971300 | 0.58172100  |
| H | 3.75880600  | -0.43378200 | -0.38752100 |
| H | 3.41639400  | -0.37104000 | 1.37265900  |
| H | 5.02642800  | -0.94771600 | 0.78655400  |
| C | 1.08064400  | 1.91741200  | -0.53917300 |
| C | 2.50778500  | 2.28879200  | -0.50097000 |
| C | 3.42622600  | 2.12765400  | -1.55590500 |
| C | 2.94663300  | 2.96419500  | 0.65767100  |
| C | 4.73434700  | 2.59541700  | -1.43332200 |
| H | 3.10678500  | 1.62137400  | -2.45548700 |
| C | 4.25993500  | 3.40946000  | 0.78695400  |
| H | 2.23891800  | 3.13943600  | 1.46548000  |
| C | 5.16254200  | 3.22566200  | -0.26280300 |
| H | 5.42416100  | 2.46750000  | -2.26376600 |
| H | 4.57295600  | 3.91396400  | 1.69740100  |
| H | 6.18515700  | 3.58336400  | -0.17471500 |
| H | 0.48429000  | 2.62797200  | 0.02716000  |
| H | -1.83017300 | -3.22851700 | 0.73839000  |

|    |             |             |            |
|----|-------------|-------------|------------|
| Na | 0.07351400  | -1.36298700 | 1.14583100 |
| O  | 1.27934000  | -0.66009100 | 3.07932400 |
| O  | -1.17200400 | -3.35586200 | 1.44539900 |
| H  | -1.39172900 | -2.68454900 | 2.15962800 |
| H  | 1.36906100  | 0.29418800  | 3.22266300 |
| O  | -1.17491700 | -1.16838900 | 2.95512200 |
| H  | 0.25595900  | -0.85832800 | 3.25240100 |
| H  | -1.73532400 | -1.08192700 | 3.73621900 |

### Int6a

|   |             |             |             |
|---|-------------|-------------|-------------|
| C | -3.17090700 | 2.82574000  | 1.60941600  |
| C | -2.42195400 | 1.83810600  | 0.97057800  |
| C | -2.38155300 | 1.77370800  | -0.43160100 |
| C | -3.10251900 | 2.71887600  | -1.16852200 |
| C | -3.84999500 | 3.71031900  | -0.52947900 |
| C | -3.88748400 | 3.76512000  | 0.86331200  |
| H | -3.19781400 | 2.85912300  | 2.69564000  |
| H | -1.86957900 | 1.11354300  | 1.56431600  |
| H | -3.07985100 | 2.67888600  | -2.25539300 |
| H | -4.40504700 | 4.43346800  | -1.12125700 |
| H | -4.47229000 | 4.53136900  | 1.36544100  |
| C | -1.54326400 | 0.73892200  | -1.16515800 |
| C | -0.03154200 | 1.02932600  | -1.17147600 |
| H | -1.85512200 | 0.75448500  | -2.22450300 |
| C | 0.79527000  | -0.03847800 | -1.83628800 |
| O | 1.92339900  | 0.23545400  | -2.34172900 |
| C | 0.27554500  | -1.35085300 | -1.75695900 |
| C | 1.13331000  | -2.50140900 | -2.22688100 |
| C | 1.67604600  | -3.32984100 | -1.06811500 |
| H | 1.94999600  | -2.10265000 | -2.83699400 |
| H | 0.55777700  | -3.20343100 | -2.84590300 |
| H | 0.86782800  | -3.79096900 | -0.50305800 |
| H | 2.41588200  | -4.08053400 | -1.36741700 |
| C | -0.97969400 | -1.68808000 | -1.13477900 |
| O | -1.34587500 | -2.86469300 | -0.95181000 |
| N | -1.77610900 | -0.63129700 | -0.62701100 |
| C | -3.13084300 | -1.00245200 | -0.28266300 |
| C | -3.42764400 | -1.37149700 | 1.03166400  |
| C | -4.13927700 | -1.00740600 | -1.24989200 |
| C | -4.72767800 | -1.74518300 | 1.37373300  |
| H | -2.63792600 | -1.35276800 | 1.77834900  |
| C | -5.44051000 | -1.37043600 | -0.90238400 |
| H | -3.90331000 | -0.73610100 | -2.27520500 |

|    |             |             |             |
|----|-------------|-------------|-------------|
| C  | -5.73757500 | -1.74208300 | 0.40999600  |
| H  | -4.95175500 | -2.03385500 | 2.39741300  |
| H  | -6.22014100 | -1.37081000 | -1.65972000 |
| H  | -6.75069000 | -2.02875000 | 0.67944300  |
| C  | 4.27666100  | -2.38613600 | 1.68039800  |
| H  | 5.33809600  | -2.15583700 | 1.81485200  |
| H  | 4.07335000  | -3.42247400 | 1.95790000  |
| H  | 3.63169200  | -1.68093400 | 2.22495500  |
| S  | 3.91037700  | -2.22383400 | -0.08595000 |
| O  | 2.30107800  | -2.45378300 | -0.02871600 |
| C  | 4.06638000  | -0.44400200 | -0.34413900 |
| H  | 3.43803600  | -0.19583600 | -1.21908700 |
| H  | 3.70231100  | 0.07289500  | 0.54615200  |
| H  | 5.12223000  | -0.23310700 | -0.53860500 |
| C  | 0.45966100  | 2.12846100  | -0.54964400 |
| C  | 1.82346600  | 2.66560500  | -0.34809400 |
| C  | 2.82972000  | 2.73726000  | -1.32831400 |
| C  | 2.09302500  | 3.22877100  | 0.91746900  |
| C  | 4.06509900  | 3.31617700  | -1.03360200 |
| H  | 2.63350700  | 2.31871400  | -2.30559700 |
| C  | 3.33525300  | 3.78730100  | 1.21577900  |
| H  | 1.30800300  | 3.23028700  | 1.67162400  |
| C  | 4.33097500  | 3.83141500  | 0.23729100  |
| H  | 4.82432000  | 3.37164800  | -1.81021600 |
| H  | 3.51762400  | 4.20432200  | 2.20300500  |
| H  | 5.29632900  | 4.27982100  | 0.45776100  |
| H  | -0.27948000 | 2.72789300  | -0.02422900 |
| H  | -0.91126400 | -3.16432500 | 1.24732200  |
| Na | 0.53379800  | -0.92367000 | 0.99293600  |
| O  | 2.18352400  | -0.19880300 | 2.53761800  |
| O  | -0.11964800 | -3.08275000 | 1.80920300  |
| H  | -0.30974600 | -2.36455300 | 2.48647000  |
| H  | 2.26303900  | 0.76808100  | 2.55862900  |
| O  | -0.17663000 | -0.75845800 | 3.05103900  |
| H  | 1.21678100  | -0.41215300 | 2.97414500  |
| H  | -0.57243200 | -0.57388300 | 3.91102600  |

**TS6a**

|   |             |            |            |
|---|-------------|------------|------------|
| C | -0.10373800 | 1.08742000 | 3.52992200 |
| C | 0.16243800  | 0.93929300 | 2.16628000 |
| C | 1.38553600  | 1.36346200 | 1.63645700 |
| C | 2.32990200  | 1.93748700 | 2.49659900 |
| C | 2.06671000  | 2.08048800 | 3.85782800 |
| C | 0.84422300  | 1.65469800 | 4.38095500 |

|   |             |             |             |
|---|-------------|-------------|-------------|
| H | -1.06676600 | 0.77109500  | 3.92474000  |
| H | -0.59359200 | 0.49467600  | 1.52818300  |
| H | 3.28414600  | 2.27519300  | 2.09759800  |
| H | 2.81130700  | 2.53366200  | 4.50689700  |
| H | 0.63055200  | 1.77289400  | 5.43978000  |
| C | 1.75619400  | 1.19651500  | 0.15284100  |
| C | 2.64436400  | -0.03045200 | -0.05082100 |
| H | 2.34106500  | 2.07615100  | -0.12822200 |
| C | 1.86050400  | -1.29734100 | -0.02903400 |
| O | 2.20510900  | -2.34944700 | 0.55957900  |
| C | 0.65991000  | -1.22903300 | -0.77709100 |
| C | 0.10798200  | -2.55186700 | -1.30878100 |
| C | 0.00890900  | -3.19276400 | -0.02178200 |
| H | 0.75277200  | -3.05421000 | -2.03356900 |
| H | -0.86141300 | -2.29457100 | -1.75091600 |
| H | -0.69623900 | -2.78894700 | 0.70055900  |
| H | 0.62380600  | -4.03799600 | 0.26215200  |
| C | -0.03985500 | 0.00157200  | -1.10941200 |
| O | -1.12136000 | 0.00471400  | -1.73306000 |
| N | 0.57561600  | 1.17864600  | -0.73628000 |
| C | -0.04722000 | 2.43892400  | -1.04346200 |
| C | -1.27715600 | 2.79698100  | -0.47905900 |
| C | 0.62025200  | 3.32694800  | -1.89229800 |
| C | -1.82683800 | 4.04695000  | -0.77456100 |
| H | -1.80340800 | 2.10669500  | 0.17790300  |
| C | 0.06743900  | 4.57673000  | -2.17498000 |
| H | 1.56498200  | 3.02894800  | -2.33931000 |
| C | -1.15915400 | 4.93928200  | -1.61714000 |
| H | -2.77933300 | 4.32758800  | -0.33148000 |
| H | 0.59141500  | 5.25998100  | -2.83778400 |
| H | -1.59277800 | 5.91098500  | -1.83730400 |
| C | -6.24905700 | -0.98719800 | 0.42165600  |
| H | -6.95539200 | -1.24927500 | 1.21594600  |
| H | -6.74109200 | -0.35379500 | -0.32024700 |
| H | -5.36160700 | -0.46548600 | 0.80872000  |
| S | -5.74553500 | -2.51689900 | -0.44331300 |
| O | -4.59847800 | -2.14199400 | -1.39401500 |
| C | -4.98371800 | -3.37612500 | 0.97770500  |
| H | -4.63246500 | -4.34222400 | 0.60418500  |
| H | -4.13767500 | -2.78976900 | 1.35903100  |
| H | -5.74971200 | -3.53968500 | 1.74285300  |
| C | 3.97238400  | 0.14894000  | -0.23491600 |
| C | 5.10646300  | -0.75840700 | -0.45710900 |
| C | 5.15340200  | -2.11578300 | -0.08421600 |

|    |             |             |             |
|----|-------------|-------------|-------------|
| C  | 6.24768400  | -0.19942800 | -1.06986700 |
| C  | 6.29221600  | -2.87741400 | -0.33928000 |
| H  | 4.29675400  | -2.55495500 | 0.41148300  |
| C  | 7.37893000  | -0.96626600 | -1.33176200 |
| H  | 6.23682900  | 0.85172600  | -1.35005500 |
| C  | 7.40512600  | -2.31394400 | -0.96708200 |
| H  | 6.31096900  | -3.92180500 | -0.03826100 |
| H  | 8.24054300  | -0.51189500 | -1.81376900 |
| H  | 8.28817300  | -2.91659600 | -1.16272900 |
| H  | 4.27452400  | 1.19590400  | -0.29394700 |
| H  | -3.75712800 | 2.31701200  | -1.62586500 |
| Na | -3.23936500 | -0.33742200 | -1.05548100 |
| O  | -2.30834300 | -1.52053300 | 1.53082900  |
| O  | -4.43274600 | 1.70062600  | -1.30075700 |
| H  | -4.16344000 | 1.51719200  | -0.34700700 |
| H  | -1.70754900 | -1.37991300 | 2.27747400  |
| O  | -3.49043800 | 0.68823400  | 0.93196700  |
| H  | -2.78245000 | -0.61140400 | 1.38446300  |
| H  | -3.66647800 | 1.21350700  | 1.72389500  |

2'

|   |             |             |             |
|---|-------------|-------------|-------------|
| C | -5.72418100 | 0.07562900  | 2.03138400  |
| C | -4.42090300 | -0.32371500 | 1.73247300  |
| C | -4.05171200 | -0.67493000 | 0.42029700  |
| C | -5.03670900 | -0.62242300 | -0.58603400 |
| C | -6.33807100 | -0.22695600 | -0.28771500 |
| C | -6.68788100 | 0.12575100  | 1.02171300  |
| H | -5.98631700 | 0.34441600  | 3.05048600  |
| H | -3.67255500 | -0.36054700 | 2.51979700  |
| H | -4.78705800 | -0.90147900 | -1.60504900 |
| H | -7.08496000 | -0.19701800 | -1.07575600 |
| H | -7.70434000 | 0.43227900  | 1.25041800  |
| C | -2.66594100 | -1.08893200 | 0.17069200  |
| C | -2.07941500 | -1.28653700 | -1.02682900 |
| H | -2.04719800 | -1.18022400 | 1.06010800  |
| H | -2.60744800 | -1.09168400 | -1.95754800 |
| C | -0.62772400 | -1.54044700 | -1.20623400 |
| O | -0.02994000 | -0.88124900 | -2.07107400 |
| C | 0.08753900  | -2.63388100 | -0.48412400 |
| C | -0.58999900 | -3.58308900 | 0.50784500  |
| C | -0.40762300 | -4.03235700 | -0.89646400 |
| H | -1.59024100 | -3.35608300 | 0.85476800  |
| H | 0.07299400  | -3.99543000 | 1.26235400  |

|    |             |             |             |
|----|-------------|-------------|-------------|
| H  | 0.39572400  | -4.72161800 | -1.13352000 |
| H  | -1.28290100 | -4.07283300 | -1.53778300 |
| C  | 1.60960400  | -2.53727300 | -0.31959200 |
| O  | 2.32483500  | -3.49742600 | -0.61240800 |
| N  | 2.05091200  | -1.37891000 | 0.24028800  |
| H  | 1.34446700  | -0.63412300 | 0.48139400  |
| C  | 3.38714700  | -1.04130700 | 0.55284400  |
| C  | 3.57918100  | 0.10269400  | 1.35226100  |
| C  | 4.50897300  | -1.76185900 | 0.10535800  |
| C  | 4.86536600  | 0.51887100  | 1.69070400  |
| H  | 2.70825400  | 0.65285100  | 1.69427100  |
| C  | 5.79107500  | -1.33056000 | 0.45668900  |
| H  | 4.36958300  | -2.64886800 | -0.49575700 |
| C  | 5.98321700  | -0.19459100 | 1.24610800  |
| H  | 4.99284600  | 1.40234000  | 2.31086600  |
| H  | 6.64863800  | -1.89857500 | 0.10594500  |
| H  | 6.98526400  | 0.12744500  | 1.51426200  |
| Na | 0.58332200  | 1.18413000  | -1.34550700 |
| H  | 0.42173200  | 0.68648200  | 0.67366100  |
| C  | -0.25753300 | 3.90823500  | 0.98818200  |
| H  | -0.06696600 | 4.51909600  | 1.87557600  |
| H  | -0.14663100 | 2.83977900  | 1.21461900  |
| H  | -1.24842800 | 4.11044000  | 0.57263300  |
| S  | 1.01385300  | 4.27638600  | -0.26705400 |
| O  | 0.66244500  | 3.42327500  | -1.50122500 |
| C  | 0.48441100  | 5.96820300  | -0.70127500 |
| H  | -0.55073500 | 5.93974100  | -1.05023200 |
| H  | 0.58917000  | 6.61351400  | 0.17526600  |
| H  | 1.14088700  | 6.31489100  | -1.50139800 |

**TS1f**

|   |             |             |             |
|---|-------------|-------------|-------------|
| C | -5.97084900 | 0.80044300  | 1.96512400  |
| C | -4.73581600 | 0.21612900  | 1.68156200  |
| C | -4.32407500 | -0.00721000 | 0.35398100  |
| C | -5.19605100 | 0.37302400  | -0.68597200 |
| C | -6.42927100 | 0.95455800  | -0.40375100 |
| C | -6.82272600 | 1.17202200  | 0.92268200  |
| H | -6.26694100 | 0.96349800  | 2.99722600  |
| H | -4.07482500 | -0.07021300 | 2.49546000  |
| H | -4.91114200 | 0.20988700  | -1.72060600 |
| H | -7.08869500 | 1.23844400  | -1.21883100 |
| H | -7.78582800 | 1.62526700  | 1.13822300  |
| C | -3.01685600 | -0.63300100 | 0.12331100  |
| C | -2.40962000 | -0.83656400 | -1.06328800 |

|              |             |             |             |
|--------------|-------------|-------------|-------------|
| H            | -2.47625400 | -0.90742400 | 1.02565100  |
| H            | -2.84897700 | -0.48397400 | -1.99330300 |
| C            | -1.01654800 | -1.31795800 | -1.21205500 |
| O            | -0.30649500 | -0.75401000 | -2.06101400 |
| C            | -0.48417200 | -2.50835900 | -0.48224500 |
| C            | -1.33074000 | -3.40205700 | 0.42625200  |
| C            | -1.10852300 | -3.82414700 | -0.98168400 |
| H            | -2.32221300 | -3.07688500 | 0.71558800  |
| H            | -0.77100800 | -3.91475300 | 1.20241500  |
| H            | -0.37577900 | -4.59583100 | -1.19239000 |
| H            | -1.94039400 | -3.74202500 | -1.67508900 |
| C            | 1.02771800  | -2.59413800 | -0.21830700 |
| O            | 1.62001800  | -3.65958500 | -0.42059600 |
| N            | 1.57444300  | -1.46587600 | 0.30225800  |
| H            | 0.89487600  | -0.51737200 | 0.60161100  |
| C            | 2.93998700  | -1.32672700 | 0.62999800  |
| C            | 3.26851800  | -0.42179300 | 1.65986100  |
| C            | 3.98331100  | -1.98308700 | -0.05300500 |
| C            | 4.60176000  | -0.17676000 | 1.99219400  |
| H            | 2.46679100  | 0.07302000  | 2.19749000  |
| C            | 5.31198200  | -1.73227800 | 0.29405800  |
| H            | 3.74379700  | -2.70130400 | -0.82625800 |
| C            | 5.63386500  | -0.82951200 | 1.31254600  |
| H            | 4.83216000  | 0.51876700  | 2.79517500  |
| H            | 6.10345900  | -2.25503700 | -0.23668100 |
| H            | 6.67099300  | -0.64622300 | 1.57814000  |
| Na           | 1.25460000  | 0.66638000  | -1.25906800 |
| H            | 0.36151000  | 0.51300700  | 0.74730600  |
| C            | 0.60963800  | 3.81586200  | 0.69274400  |
| H            | 0.71994500  | 4.47789300  | 1.55656900  |
| H            | 0.34547100  | 2.80061700  | 1.01082100  |
| H            | -0.13578400 | 4.20022000  | -0.00855200 |
| S            | 2.21975800  | 3.66858100  | -0.15342800 |
| O            | 1.97638900  | 2.77300900  | -1.38214600 |
| C            | 2.32438900  | 5.36271000  | -0.82406700 |
| H            | 1.45243400  | 5.55137800  | -1.45506300 |
| H            | 2.37624700  | 6.07505800  | 0.00396500  |
| H            | 3.23749300  | 5.41539300  | -1.41966700 |
| <b>Int1f</b> |             |             |             |
| C            | -6.43492800 | 1.32006500  | 0.58377500  |
| C            | -5.17357500 | 0.75872100  | 0.78237000  |
| C            | -4.59160800 | -0.08096500 | -0.18747600 |
| C            | -5.32011600 | -0.34685900 | -1.36518100 |



|    |             |             |             |
|----|-------------|-------------|-------------|
| C  | -6.57995600 | 0.21130000  | -1.56182300 |
| C  | -7.14258900 | 1.04796800  | -0.58941500 |
| H  | -6.86325700 | 1.96834500  | 1.34243100  |
| H  | -4.62170700 | 0.97426100  | 1.69335400  |
| H  | -4.90142500 | -0.99652000 | -2.12715100 |
| H  | -7.12820300 | -0.00542300 | -2.47409400 |
| H  | -8.12561900 | 1.48183400  | -0.74770400 |
| C  | -3.26403000 | -0.63531600 | 0.08037500  |
| C  | -2.49567300 | -1.36381600 | -0.76140500 |
| H  | -2.86280300 | -0.40587300 | 1.06535900  |
| H  | -2.81583500 | -1.60504200 | -1.77160800 |
| C  | -1.15076900 | -1.84603600 | -0.42830200 |
| O  | -0.47809900 | -2.42161100 | -1.30512000 |
| C  | -0.59401300 | -1.61763300 | 0.95437800  |
| C  | -1.18796000 | -2.36266600 | 2.12093800  |
| C  | 0.18062700  | -2.74569700 | 1.61869100  |
| H  | -2.00640900 | -3.04990500 | 1.92476500  |
| H  | -1.25330000 | -1.79446500 | 3.04427100  |
| H  | 1.03765800  | -2.46561900 | 2.22518200  |
| H  | 0.28636700  | -3.67874000 | 1.07100700  |
| C  | -0.05873700 | -0.18295300 | 1.20763200  |
| O  | -0.25201300 | 0.32721500  | 2.32751300  |
| N  | 0.58231900  | 0.29617400  | 0.12749600  |
| C  | 1.17218400  | 1.56435600  | 0.12083100  |
| C  | 1.51172700  | 2.09678200  | -1.14739300 |
| C  | 1.50546400  | 2.34411400  | 1.25748500  |
| C  | 2.15090600  | 3.32805800  | -1.28269300 |
| H  | 1.23766600  | 1.52758800  | -2.03323500 |
| C  | 2.15314300  | 3.57386700  | 1.11181400  |
| H  | 1.23450700  | 1.97638000  | 2.23809200  |
| C  | 2.48508100  | 4.07977200  | -0.14974200 |
| H  | 2.38178500  | 3.70569000  | -2.27603100 |
| H  | 2.39376600  | 4.14893600  | 2.00319700  |
| H  | 2.97797800  | 5.04266200  | -0.24937300 |
| Na | 1.56606300  | -1.40737400 | -1.12870400 |
| C  | 5.03030000  | 0.85496200  | -0.32108400 |
| H  | 5.81640300  | 1.23029200  | 0.34006100  |
| H  | 4.09107100  | 1.37123100  | -0.11246300 |
| H  | 5.30375400  | 0.97773700  | -1.37185800 |
| S  | 4.77131700  | -0.91492400 | 0.02981700  |
| O  | 3.78669500  | -1.43318800 | -1.03500400 |
| C  | 6.40358500  | -1.52664200 | -0.51115000 |
| H  | 6.56325900  | -1.24379200 | -1.55447000 |
| H  | 7.17809100  | -1.10691600 | 0.13635600  |

|             |             |             |             |
|-------------|-------------|-------------|-------------|
| H           | 6.38522200  | -2.61360200 | -0.41472800 |
| <b>TS2f</b> |             |             |             |
| C           | -4.71218500 | 0.29086000  | -1.64989600 |
| C           | -3.45650300 | -0.26894600 | -1.41475000 |
| C           | -3.17409500 | -0.91059300 | -0.19756900 |
| C           | -4.17973800 | -0.96061100 | 0.78146600  |
| C           | -5.43974600 | -0.40826100 | 0.54671800  |
| C           | -5.70908000 | 0.22075200  | -0.67174300 |
| H           | -4.91271400 | 0.78571100  | -2.59589300 |
| H           | -2.68518500 | -0.20134700 | -2.17490500 |
| H           | -3.97157700 | -1.44619700 | 1.73173500  |
| H           | -6.20791400 | -0.46640800 | 1.31263600  |
| H           | -6.68697100 | 0.65599300  | -0.85714900 |
| C           | -1.85382400 | -1.53249900 | 0.07827400  |
| C           | -1.12624900 | -2.18344900 | -0.97549500 |
| H           | -1.82781500 | -2.00582400 | 1.05560000  |
| H           | -1.50289400 | -2.18554300 | -1.99237800 |
| C           | 0.20534600  | -2.52644800 | -0.73175000 |
| O           | 1.08837900  | -2.91892700 | -1.56053900 |
| C           | 0.67551400  | -2.11701200 | 0.67091900  |
| C           | 0.43896500  | -2.99375700 | 1.87847100  |
| C           | 1.83572400  | -2.82079900 | 1.32350400  |
| H           | -0.06071000 | -3.94504400 | 1.71661600  |
| H           | 0.20440500  | -2.50955500 | 2.82290100  |
| H           | 2.53388200  | -2.22415400 | 1.90457000  |
| H           | 2.26842300  | -3.66303200 | 0.78882400  |
| C           | 0.55893300  | -0.59778100 | 0.75690600  |
| O           | 1.62746200  | 0.07885600  | 0.73141200  |
| N           | -0.68867800 | -0.13845800 | 0.72671500  |
| C           | -0.99289000 | 1.22669600  | 0.55803200  |
| C           | -0.57858600 | 1.93578700  | -0.58395500 |
| C           | -1.79095000 | 1.88192800  | 1.50925300  |
| C           | -0.94671100 | 3.27041800  | -0.75990200 |
| H           | 0.02570200  | 1.42933400  | -1.32977300 |
| C           | -2.15828200 | 3.21623400  | 1.32863000  |
| H           | -2.11682700 | 1.33188100  | 2.38651200  |
| C           | -1.73722500 | 3.91816100  | 0.19500100  |
| H           | -0.62220300 | 3.80419900  | -1.64948100 |
| H           | -2.77626600 | 3.70838800  | 2.07459100  |
| H           | -2.02563500 | 4.95582700  | 0.05460000  |
| Na          | 2.73640400  | -1.42900400 | -0.97803200 |
| C           | 4.75407400  | 0.95549900  | 1.35394000  |
| H           | 4.96652800  | 1.89514100  | 1.87185900  |

|   |            |             |             |
|---|------------|-------------|-------------|
| H | 5.50190400 | 0.20829600  | 1.62718100  |
| H | 3.74101400 | 0.60288300  | 1.56557100  |
| S | 4.91658000 | 1.23074100  | -0.44597300 |
| O | 4.49639200 | -0.08747500 | -1.12313000 |
| C | 3.51101600 | 2.38273600  | -0.63627100 |
| H | 2.60762100 | 1.91968700  | -0.22828800 |
| H | 3.75251400 | 3.31282100  | -0.11353300 |
| H | 3.41082200 | 2.58022600  | -1.70551800 |

**Int2f**

|   |             |             |             |
|---|-------------|-------------|-------------|
| C | -3.43773400 | -1.18165800 | -2.58970200 |
| C | -2.34792700 | -1.21668200 | -1.71956400 |
| C | -2.53882600 | -1.27783100 | -0.33146800 |
| C | -3.84707500 | -1.31559100 | 0.16216100  |
| C | -4.94425800 | -1.28759700 | -0.70529100 |
| C | -4.74249700 | -1.21710400 | -2.08463800 |
| H | -3.27180800 | -1.13533900 | -3.66283600 |
| H | -1.33454700 | -1.20974700 | -2.11082200 |
| H | -4.01008900 | -1.36769300 | 1.23580500  |
| H | -5.95262900 | -1.32124300 | -0.30222300 |
| H | -5.59176900 | -1.19579200 | -2.76185300 |
| C | -1.34975800 | -1.34243900 | 0.62138900  |
| C | -0.37286500 | -2.41023900 | 0.20032700  |
| H | -1.76201900 | -1.53148500 | 1.62851100  |
| H | -0.74594700 | -3.22729800 | -0.40719800 |
| C | 0.92672400  | -2.40154000 | 0.61806400  |
| O | 1.86344000  | -3.25255200 | 0.32037700  |
| C | 1.31035400  | -1.20780500 | 1.49254400  |
| C | 1.53421200  | -1.45098600 | 2.98912700  |
| C | 2.69509700  | -1.13507700 | 2.09278100  |
| H | 1.40823300  | -2.47481900 | 3.32864300  |
| H | 1.20109500  | -0.68172600 | 3.68042100  |
| H | 3.14653200  | -0.15407100 | 2.18761800  |
| H | 3.35911400  | -1.96227500 | 1.85796800  |
| C | 0.63487800  | 0.09189700  | 1.15165800  |
| O | 1.21214600  | 1.18657700  | 1.27337700  |
| N | -0.65848800 | 0.00158200  | 0.71192200  |
| C | -1.45233200 | 1.20354100  | 0.73107400  |
| C | -1.67062600 | 1.93303400  | -0.44032900 |
| C | -2.01658200 | 1.64166900  | 1.93384300  |
| C | -2.44771500 | 3.09305800  | -0.41013200 |
| H | -1.23879200 | 1.58171200  | -1.37112600 |
| C | -2.79584800 | 2.80019900  | 1.96368800  |
| H | -1.83404000 | 1.07790300  | 2.84390900  |

|    |             |             |             |
|----|-------------|-------------|-------------|
| C  | -3.01297500 | 3.52922200  | 0.79126000  |
| H  | -2.61609600 | 3.65224900  | -1.32618400 |
| H  | -3.22945200 | 3.13385700  | 2.90214800  |
| H  | -3.61985500 | 4.42978400  | 0.81342900  |
| Na | 3.16046000  | -2.02434200 | -0.86948300 |
| C  | 4.18908500  | 2.03626600  | 0.03262500  |
| H  | 4.24631700  | 3.12850500  | 0.00859400  |
| H  | 5.14369300  | 1.62640200  | 0.36844700  |
| H  | 3.35792900  | 1.70152000  | 0.66126700  |
| S  | 3.93373100  | 1.44596800  | -1.67525700 |
| O  | 3.82828400  | -0.08946700 | -1.59620600 |
| C  | 2.23109500  | 2.06876000  | -1.88972100 |
| H  | 1.61547800  | 1.75798200  | -1.04150800 |
| H  | 2.27412700  | 3.15986600  | -1.95538000 |
| H  | 1.86166300  | 1.65787300  | -2.83122300 |

### TS3f

|   |             |             |             |
|---|-------------|-------------|-------------|
| C | 2.59662900  | -2.78803400 | 1.52458300  |
| C | 1.65532100  | -2.06847700 | 0.78790300  |
| C | 1.99294300  | -1.48794800 | -0.44359200 |
| C | 3.29705400  | -1.65265800 | -0.92115600 |
| C | 4.24554700  | -2.37630200 | -0.19006800 |
| C | 3.89902900  | -2.94547000 | 1.03621600  |
| H | 2.31684700  | -3.23015200 | 2.47741400  |
| H | 0.64369900  | -1.94897400 | 1.16575500  |
| H | 3.57535300  | -1.20608600 | -1.87230900 |
| H | 5.25312300  | -2.49189600 | -0.57960700 |
| H | 4.63293900  | -3.50767100 | 1.60667800  |
| C | 0.95476000  | -0.73768200 | -1.27321400 |
| C | -0.23282900 | -1.62214800 | -1.55955000 |
| H | 1.45974100  | -0.43352000 | -2.21034900 |
| H | -0.05908900 | -2.68688100 | -1.68477800 |
| C | -1.43096300 | -1.05560900 | -1.95123900 |
| O | -2.50646700 | -1.73743700 | -2.28376600 |
| C | -1.55946800 | 0.38237800  | -1.85913200 |
| C | -3.80984300 | 0.19815300  | -1.94805900 |
| C | -2.75748500 | 1.02827200  | -2.52515600 |
| H | -4.01462600 | 0.29512100  | -0.88647200 |
| H | -4.44344200 | -0.46184400 | -2.52468800 |
| H | -2.72740000 | 1.00713600  | -3.61809400 |
| H | -2.78740000 | 2.06401000  | -2.16676300 |
| C | -0.70558300 | 1.13786100  | -0.98971000 |
| O | -0.99954200 | 2.27142600  | -0.54672000 |
| N | 0.51153300  | 0.52710500  | -0.58915800 |

|    |             |             |             |
|----|-------------|-------------|-------------|
| C  | 1.57539400  | 1.44878500  | -0.26669100 |
| C  | 2.19786800  | 1.40687000  | 0.98406300  |
| C  | 2.02191900  | 2.37287000  | -1.22116100 |
| C  | 3.25351500  | 2.27449400  | 1.27871900  |
| H  | 1.86403800  | 0.68479000  | 1.72080600  |
| C  | 3.07202800  | 3.24288100  | -0.92590900 |
| H  | 1.53088600  | 2.41713800  | -2.18848800 |
| C  | 3.69335200  | 3.19587700  | 0.32600000  |
| H  | 3.73146400  | 2.22703100  | 2.25329600  |
| H  | 3.40346700  | 3.95889600  | -1.67280500 |
| H  | 4.51227300  | 3.87159500  | 0.55565000  |
| Na | -2.56440800 | -2.15979700 | -0.07704800 |
| C  | -3.31634000 | 1.70534600  | 1.78230800  |
| H  | -3.23707300 | 2.53899800  | 2.48664700  |
| H  | -4.35480300 | 1.60393500  | 1.45974100  |
| H  | -2.63930900 | 1.85823000  | 0.93339200  |
| S  | -2.90077000 | 0.17832700  | 2.69250900  |
| O  | -3.05929400 | -0.99578600 | 1.70474900  |
| C  | -1.10773300 | 0.47081100  | 2.84987700  |
| H  | -0.66730000 | 0.57897900  | 1.85550700  |
| H  | -0.95393900 | 1.37767500  | 3.44116100  |
| H  | -0.68764800 | -0.38896000 | 3.37549900  |

**2''**

|   |             |             |             |
|---|-------------|-------------|-------------|
| C | 5.36105300  | -3.62767400 | -0.15815700 |
| C | 4.42935100  | -2.75318700 | -0.71824300 |
| C | 3.05784600  | -2.85916600 | -0.41609600 |
| C | 2.64895200  | -3.88337600 | 0.46220800  |
| C | 3.57819200  | -4.75816400 | 1.01911900  |
| C | 4.93932200  | -4.63413300 | 0.71368100  |
| H | 6.41396400  | -3.52291400 | -0.40300700 |
| H | 4.76172300  | -1.96953800 | -1.39392800 |
| H | 1.59705500  | -4.00317600 | 0.70176600  |
| H | 3.24241700  | -5.54383000 | 1.69015400  |
| H | 5.66087200  | -5.31918400 | 1.14916700  |
| C | 2.13073200  | -1.90372200 | -1.03092800 |
| C | 0.80994800  | -1.77997600 | -0.78086200 |
| H | 2.58814500  | -1.24294900 | -1.76357500 |
| H | 0.30325900  | -2.43085500 | -0.07438200 |
| C | -0.11466600 | -0.88418600 | -1.50165500 |
| O | -1.32306600 | -1.17686000 | -1.52249700 |
| C | 0.40987000  | 0.23232000  | -2.36927000 |
| C | 0.25523900  | -0.05149100 | -3.86904200 |
| C | -0.61345900 | 0.97351000  | -3.22383600 |

|    |             |             |             |
|----|-------------|-------------|-------------|
| H  | -0.18962700 | -1.00596000 | -4.13243400 |
| H  | 1.08762400  | 0.28042900  | -4.48007800 |
| H  | -0.39252000 | 2.01800000  | -3.41872500 |
| H  | -1.65443500 | 0.73390900  | -3.03557900 |
| C  | 1.63076600  | 1.06707800  | -1.98975800 |
| O  | 2.44406600  | 1.41302800  | -2.85551000 |
| N  | 1.68815600  | 1.41601500  | -0.67909100 |
| H  | 0.87944100  | 1.08741500  | -0.06438700 |
| C  | 2.67308400  | 2.18803600  | -0.03901400 |
| C  | 2.59294700  | 2.27472200  | 1.36617300  |
| C  | 3.70668300  | 2.87338700  | -0.70558900 |
| C  | 3.51621100  | 3.03091000  | 2.08465100  |
| H  | 1.79856800  | 1.73823700  | 1.87598100  |
| C  | 4.62639900  | 3.62460600  | 0.03173600  |
| H  | 3.77818600  | 2.80675100  | -1.78199500 |
| C  | 4.54287700  | 3.71380700  | 1.42317500  |
| H  | 3.43680800  | 3.08167600  | 3.16765000  |
| H  | 5.41931000  | 4.14683300  | -0.49742100 |
| H  | 5.26529100  | 4.30030900  | 1.98332100  |
| Na | -2.51643600 | 0.22865300  | 0.14815800  |
| H  | -0.29756800 | 0.64977200  | 0.73516500  |
| C  | -1.13169000 | 3.75690600  | 1.55273100  |
| H  | -0.35947800 | 4.53088900  | 1.57441700  |
| H  | -0.72389800 | 2.80296000  | 1.89310400  |
| H  | -2.00623200 | 4.04520600  | 2.14220600  |
| S  | -1.64811700 | 3.46236200  | -0.17373100 |
| O  | -2.84605400 | 2.50553700  | -0.11015700 |
| C  | -2.38498000 | 5.10838100  | -0.48631000 |
| H  | -3.16994100 | 5.29823200  | 0.25006900  |
| H  | -1.60295100 | 5.87149200  | -0.43907900 |
| H  | -2.81575200 | 5.07755800  | -1.48882000 |
| C  | -0.14573600 | -1.32007200 | 3.23622600  |
| H  | 0.48925200  | -1.05539500 | 4.08688500  |
| H  | 0.32992500  | -1.02932400 | 2.29724900  |
| H  | -0.39751900 | -2.38398200 | 3.24772700  |
| S  | -1.68497100 | -0.34252200 | 3.30103400  |
| O  | -2.61620300 | -0.91606900 | 2.22318000  |
| C  | -2.33432700 | -1.01784700 | 4.87584300  |
| H  | -2.42897000 | -2.10376400 | 4.79536500  |
| H  | -1.66474100 | -0.74120600 | 5.69534000  |
| H  | -3.31753400 | -0.56956300 | 5.03070700  |
| C  | -3.73221900 | -3.15750900 | -0.09045100 |
| H  | -4.00311700 | -4.19959700 | -0.28447500 |
| H  | -3.80366900 | -2.93071200 | 0.97528000  |

|   |             |             |             |
|---|-------------|-------------|-------------|
| H | -2.72751700 | -2.92577200 | -0.45220200 |
| S | -4.93658500 | -2.06574500 | -0.93351900 |
| O | -4.52198100 | -0.62820100 | -0.61872600 |
| C | -4.37909700 | -2.38788800 | -2.64826500 |
| H | -3.32847400 | -2.09920000 | -2.72838600 |
| H | -4.52613200 | -3.44570200 | -2.88493500 |
| H | -4.99718000 | -1.77096300 | -3.30351500 |

**TS1g**

|   |             |             |             |
|---|-------------|-------------|-------------|
| C | 6.42897100  | -2.21236800 | -0.08571100 |
| C | 5.25188100  | -1.67541700 | -0.60757100 |
| C | 3.99301500  | -2.18362300 | -0.23255400 |
| C | 3.95212500  | -3.25742200 | 0.68014900  |
| C | 5.12682400  | -3.79470800 | 1.19906200  |
| C | 6.37070700  | -3.27428700 | 0.81963600  |
| H | 7.38867100  | -1.80175000 | -0.38518100 |
| H | 5.29845000  | -0.84587500 | -1.30800200 |
| H | 2.99766400  | -3.67895700 | 0.97938900  |
| H | 5.07645800  | -4.62390200 | 1.89900900  |
| H | 7.28480300  | -3.69656500 | 1.22673900  |
| C | 2.79591300  | -1.56907600 | -0.81220300 |
| C | 1.50898500  | -1.85406800 | -0.51677600 |
| H | 2.99870500  | -0.80388600 | -1.55809800 |
| H | 1.24816200  | -2.61551800 | 0.21374000  |
| C | 0.33640200  | -1.24827000 | -1.17297700 |
| O | -0.77728300 | -1.76322200 | -0.98573400 |
| C | 0.51557000  | -0.10707800 | -2.13809000 |
| C | 0.56266900  | -0.54770600 | -3.60080700 |
| C | -0.63147400 | 0.19371600  | -3.08984600 |
| H | 0.45782800  | -1.61070700 | -3.79865500 |
| H | 1.28848200  | -0.01555300 | -4.20708500 |
| H | -0.74264500 | 1.23300600  | -3.38160800 |
| H | -1.55804800 | -0.34967300 | -2.93660700 |
| C | 1.39632000  | 1.09747900  | -1.77530400 |
| O | 2.15402900  | 1.57392400  | -2.63787300 |
| N | 1.22226900  | 1.54096600  | -0.51280100 |
| H | 0.27181700  | 1.11879400  | 0.13809600  |
| C | 1.86581200  | 2.65584200  | 0.04645700  |
| C | 1.77348700  | 2.80021100  | 1.44879000  |
| C | 2.55941800  | 3.64670200  | -0.68153100 |
| C | 2.34424800  | 3.89331100  | 2.09830500  |
| H | 1.24622100  | 2.03990700  | 2.01510400  |
| C | 3.13152500  | 4.73391000  | -0.01583300 |
| H | 2.65234600  | 3.54261200  | -1.75360700 |

|    |             |             |             |
|----|-------------|-------------|-------------|
| C  | 3.02996700  | 4.87237400  | 1.37126100  |
| H  | 2.26013100  | 3.97655900  | 3.17927600  |
| H  | 3.66688100  | 5.48179100  | -0.59584500 |
| H  | 3.48245900  | 5.72055500  | 1.87714200  |
| Na | -2.55170200 | -0.26499800 | 0.00241100  |
| H  | -0.62361600 | 0.81218700  | 0.73869900  |
| C  | -2.08659600 | 3.73874300  | 0.74492000  |
| H  | -1.52204700 | 4.66818600  | 0.63084500  |
| H  | -1.49312000 | 3.00336000  | 1.29100000  |
| H  | -3.04953400 | 3.90987700  | 1.23367500  |
| S  | -2.37530900 | 3.00407200  | -0.90093700 |
| O  | -3.30813200 | 1.80363300  | -0.68819800 |
| C  | -3.45581800 | 4.32175800  | -1.56645400 |
| H  | -4.32475800 | 4.43788300  | -0.91377000 |
| H  | -2.88790300 | 5.25335200  | -1.64085600 |
| H  | -3.77592000 | 3.99938200  | -2.55896100 |
| C  | -0.26395000 | -0.82548800 | 3.41895800  |
| H  | 0.25595000  | -0.33989800 | 4.24994700  |
| H  | 0.22584400  | -0.58920600 | 2.47288200  |
| H  | -0.33184200 | -1.90583100 | 3.57208100  |
| S  | -1.94862300 | -0.13649200 | 3.27297900  |
| O  | -2.68623700 | -1.00275800 | 2.24160300  |
| C  | -2.58069100 | -0.71137500 | 4.89351900  |
| H  | -2.48071600 | -1.79775200 | 4.95992600  |
| H  | -2.02793900 | -0.21551200 | 5.69660900  |
| H  | -3.63475700 | -0.43127600 | 4.93948800  |
| C  | -3.07816300 | -3.83255800 | 0.44486000  |
| H  | -3.12911100 | -4.92499900 | 0.47876400  |
| H  | -3.40131800 | -3.40044100 | 1.39393000  |
| H  | -2.07261000 | -3.48006300 | 0.20344900  |
| S  | -4.24902500 | -3.22938800 | -0.82692400 |
| O  | -4.14582600 | -1.70370100 | -0.83707000 |
| C  | -3.31515700 | -3.80806400 | -2.29219200 |
| H  | -2.32342100 | -3.35011400 | -2.27321600 |
| H  | -3.25373700 | -4.90005300 | -2.27493500 |
| H  | -3.87204300 | -3.48101900 | -3.17241700 |

**Int1g**

|   |            |             |             |
|---|------------|-------------|-------------|
| C | 7.36705200 | -0.66608300 | -0.48962300 |
| C | 6.11497200 | -0.51501400 | 0.10667900  |
| C | 5.20981700 | 0.46686800  | -0.34107800 |
| C | 5.60441600 | 1.29845400  | -1.40910500 |
| C | 6.85434700 | 1.14879500  | -2.00332800 |
| C | 7.74188700 | 0.16597100  | -1.54705200 |



|    |             |             |             |
|----|-------------|-------------|-------------|
| H  | 8.04705200  | -1.43301300 | -0.13046600 |
| H  | 5.82243000  | -1.16771000 | 0.92479200  |
| H  | 4.93047500  | 2.06621300  | -1.77567500 |
| H  | 7.14046900  | 1.79873700  | -2.82538500 |
| H  | 8.71568100  | 0.05176200  | -2.01440900 |
| C  | 3.91022700  | 0.57198200  | 0.32618400  |
| C  | 2.88776900  | 1.39265900  | -0.00096400 |
| H  | 3.77054000  | -0.10700200 | 1.16467500  |
| H  | 2.94990700  | 2.07909100  | -0.84162700 |
| C  | 1.60029000  | 1.43669100  | 0.70993100  |
| O  | 0.72862100  | 2.24003900  | 0.33411300  |
| C  | 1.36494200  | 0.51411600  | 1.87537900  |
| C  | 2.03722800  | 0.80731900  | 3.19475400  |
| C  | 0.55115100  | 1.00833300  | 3.05576600  |
| H  | 2.66491900  | 1.69214900  | 3.26230000  |
| H  | 2.38753600  | -0.06827500 | 3.73404700  |
| H  | -0.10315300 | 0.28534800  | 3.53453100  |
| H  | 0.16130600  | 2.02101300  | 3.00878600  |
| C  | 1.17588600  | -0.95928900 | 1.45745600  |
| O  | 1.62581400  | -1.85115600 | 2.20758600  |
| N  | 0.50873700  | -1.03985500 | 0.29367100  |
| C  | 0.32233100  | -2.25800600 | -0.36350600 |
| C  | -0.30223800 | -2.19496900 | -1.63585400 |
| C  | 0.69936000  | -3.54517000 | 0.10448600  |
| C  | -0.54137000 | -3.33914100 | -2.39384300 |
| H  | -0.58701700 | -1.21884600 | -2.01914100 |
| C  | 0.45787100  | -4.68480800 | -0.66839900 |
| H  | 1.18179200  | -3.62463800 | 1.06904700  |
| C  | -0.16568800 | -4.60227900 | -1.91718300 |
| H  | -1.01525900 | -3.24518000 | -3.36865500 |
| H  | 0.76598400  | -5.65456900 | -0.28282800 |
| H  | -0.34503200 | -5.49525500 | -2.50961300 |
| Na | -1.29353800 | 0.70856000  | 0.11767300  |
| C  | -2.96582900 | -3.44269300 | 0.87538300  |
| H  | -2.80683300 | -4.33663900 | 1.48431600  |
| H  | -2.29865600 | -3.46438400 | 0.01257500  |
| H  | -4.00919300 | -3.35588300 | 0.56069800  |
| S  | -2.51344100 | -1.97350100 | 1.85977400  |
| O  | -2.91974200 | -0.74996200 | 1.01980200  |
| C  | -3.82239600 | -2.12623700 | 3.12914300  |
| H  | -4.80102100 | -2.13774700 | 2.64243400  |
| H  | -3.65847700 | -3.03929700 | 3.70818200  |
| H  | -3.73674000 | -1.25349300 | 3.77906000  |
| C  | -4.41874800 | 0.34480500  | -3.73188200 |

|   |             |             |             |
|---|-------------|-------------|-------------|
| H | -5.39199300 | -0.14015500 | -3.84917100 |
| H | -3.72482800 | -0.02522500 | -4.48887500 |
| H | -4.50999500 | 1.43141900  | -3.80617800 |
| S | -3.71458900 | -0.09522300 | -2.10117300 |
| O | -2.43796100 | 0.74819000  | -1.97773400 |
| C | -4.97809600 | 0.71864200  | -1.06274900 |
| H | -5.06705900 | 1.76892700  | -1.34986800 |
| H | -5.92832900 | 0.19108900  | -1.18899800 |
| H | -4.62321400 | 0.63168200  | -0.03479400 |
| C | -1.43780700 | 3.96811300  | -1.38808200 |
| H | -1.38409800 | 4.97044200  | -1.82339400 |
| H | -1.96559700 | 3.28315500  | -2.05522100 |
| H | -0.44537100 | 3.57375900  | -1.15891900 |
| S | -2.43323000 | 4.05377900  | 0.14751500  |
| O | -2.55897800 | 2.62562800  | 0.68627500  |
| C | -1.18519400 | 4.89140300  | 1.19186200  |
| H | -0.29035500 | 4.26589300  | 1.22459500  |
| H | -0.97104100 | 5.87850400  | 0.77184500  |
| H | -1.62201300 | 4.99739300  | 2.18679100  |

**TS2g**

|   |             |             |             |
|---|-------------|-------------|-------------|
| C | 4.40859300  | -3.60142000 | 0.87079800  |
| C | 3.23023900  | -2.96791100 | 0.47925500  |
| C | 3.18784800  | -2.17735000 | -0.68354400 |
| C | 4.37222900  | -2.02466500 | -1.42521300 |
| C | 5.55413900  | -2.65499600 | -1.03520600 |
| C | 5.57568500  | -3.44873200 | 0.11421100  |
| H | 4.41996400  | -4.21306400 | 1.76880500  |
| H | 2.33439100  | -3.08893200 | 1.07966300  |
| H | 4.36152500  | -1.39941800 | -2.31376600 |
| H | 6.45714000  | -2.52194600 | -1.62381700 |
| H | 6.49411500  | -3.94012700 | 0.42240500  |
| C | 1.95762000  | -1.50960200 | -1.15020100 |
| C | 0.66531000  | -1.90877600 | -0.75071200 |
| H | 2.06397700  | -1.07234000 | -2.13669800 |
| H | 0.51643400  | -2.72412500 | -0.05028100 |
| C | -0.41441200 | -1.05995700 | -1.04173300 |
| O | -1.61097900 | -1.24519500 | -0.64088700 |
| C | -0.06543000 | 0.22480400  | -1.77172800 |
| C | -0.02880300 | 0.20069900  | -3.30577300 |
| C | -1.13783000 | 0.90295900  | -2.57474200 |
| H | -0.23840500 | -0.74857200 | -3.79215500 |
| H | 0.72764100  | 0.80909200  | -3.79476300 |
| H | -1.13740100 | 1.98493900  | -2.56999800 |

|    |             |             |             |
|----|-------------|-------------|-------------|
| H  | -2.11710500 | 0.43507200  | -2.57192100 |
| C  | 1.00227000  | 1.12014900  | -1.11250200 |
| O  | 0.85047300  | 2.36335500  | -1.17006000 |
| N  | 2.01489200  | 0.47302500  | -0.51033700 |
| C  | 3.18829900  | 1.12550500  | -0.11329900 |
| C  | 3.83548500  | 0.69593100  | 1.06258400  |
| C  | 3.80116500  | 2.14697700  | -0.87166800 |
| C  | 5.04499100  | 1.26146000  | 1.46802100  |
| H  | 3.37839700  | -0.09584100 | 1.64743000  |
| C  | 5.00922300  | 2.70920800  | -0.46034300 |
| H  | 3.30872000  | 2.50478400  | -1.76825300 |
| C  | 5.64124200  | 2.27354100  | 0.71008300  |
| H  | 5.52349500  | 0.90844300  | 2.37802400  |
| H  | 5.46082400  | 3.49673200  | -1.05869900 |
| H  | 6.58233700  | 2.71564700  | 1.02459300  |
| Na | -2.95161200 | 0.44456300  | 0.28091400  |
| C  | -1.50529700 | 4.72754300  | -1.04393500 |
| H  | -1.06625900 | 5.66463900  | -0.68843800 |
| H  | -2.22305700 | 4.93404600  | -1.84044400 |
| H  | -0.73003900 | 4.02796600  | -1.36986200 |
| S  | -2.44345500 | 3.97366500  | 0.33164000  |
| O  | -2.98801800 | 2.64072500  | -0.20539200 |
| C  | -1.01158600 | 3.57326300  | 1.39536100  |
| H  | -0.23753600 | 3.09114800  | 0.79150700  |
| H  | -0.64362900 | 4.50385600  | 1.83820400  |
| H  | -1.38455000 | 2.89924300  | 2.16965600  |
| C  | 0.38061000  | -0.38844000 | 2.86516300  |
| H  | 0.93981100  | -1.15629900 | 3.40783500  |
| H  | 0.71899400  | 0.60056100  | 3.17973100  |
| H  | 0.50198900  | -0.49919500 | 1.78450100  |
| S  | -1.38314400 | -0.51519800 | 3.32529000  |
| O  | -2.13257400 | 0.49658600  | 2.44564900  |
| C  | -1.71732300 | -2.16219900 | 2.60409000  |
| H  | -1.55859400 | -2.11690100 | 1.52079400  |
| H  | -1.06724600 | -2.90034700 | 3.08254500  |
| H  | -2.76156700 | -2.39347100 | 2.82497300  |
| C  | -4.24455000 | -2.54753400 | -1.95458400 |
| H  | -4.38152600 | -3.58767300 | -2.26442800 |
| H  | -3.18340200 | -2.31257100 | -1.83447800 |
| H  | -4.71722100 | -1.85955600 | -2.66067600 |
| S  | -4.98282000 | -2.31629000 | -0.30200200 |
| O  | -4.84046600 | -0.82951300 | 0.04098600  |
| C  | -6.73625000 | -2.53145900 | -0.77286300 |
| H  | -6.99300900 | -1.78975300 | -1.53333500 |

|   |             |             |             |
|---|-------------|-------------|-------------|
| H | -6.89122100 | -3.54871400 | -1.14314700 |
| H | -7.33210000 | -2.36517300 | 0.12643700  |

**Int2g**

|    |             |             |             |
|----|-------------|-------------|-------------|
| C  | -3.38240900 | 2.74488200  | 1.62830100  |
| C  | -2.88415500 | 1.58002000  | 1.04470500  |
| C  | -3.11227800 | 1.30037600  | -0.31098700 |
| C  | -3.84938200 | 2.21941100  | -1.06558600 |
| C  | -4.33836100 | 3.39843300  | -0.49023900 |
| C  | -4.10810600 | 3.66515900  | 0.86036300  |
| H  | -3.21327200 | 2.93425200  | 2.68554200  |
| H  | -2.31814800 | 0.87331900  | 1.64595100  |
| H  | -4.04866700 | 2.00988800  | -2.11440900 |
| H  | -4.90980100 | 4.09799600  | -1.09448000 |
| H  | -4.49855800 | 4.57119700  | 1.31527800  |
| C  | -2.51937500 | 0.04859800  | -0.98105600 |
| C  | -1.05152500 | 0.22491900  | -1.25720500 |
| H  | -3.05284100 | -0.06526000 | -1.93542800 |
| H  | -0.80287700 | 0.98227100  | -1.99591800 |
| C  | -0.04658000 | -0.44291800 | -0.61844400 |
| O  | 1.22737100  | -0.25024000 | -0.81334800 |
| C  | -0.44028700 | -1.50807500 | 0.38000700  |
| C  | 0.52856000  | -2.66783200 | 0.59137400  |
| C  | 0.38426100  | -1.63945000 | 1.66445600  |
| H  | 1.42088000  | -2.62686300 | -0.02425700 |
| H  | 0.07645600  | -3.63957400 | 0.75689600  |
| H  | -0.16700700 | -1.91840100 | 2.55715700  |
| H  | 1.18809500  | -0.92014300 | 1.78770300  |
| C  | -1.88860600 | -1.89244600 | 0.52079600  |
| O  | -2.22810000 | -2.83940100 | 1.23609300  |
| N  | -2.81738000 | -1.16623600 | -0.19248800 |
| C  | -4.19622300 | -1.57467800 | -0.14126600 |
| C  | -4.93078100 | -1.49334800 | 1.04575700  |
| C  | -4.81267400 | -2.04517600 | -1.30551300 |
| C  | -6.27284900 | -1.87618500 | 1.06419200  |
| H  | -4.44471000 | -1.14305700 | 1.94886800  |
| C  | -6.15857800 | -2.41935400 | -1.28731400 |
| H  | -4.23272100 | -2.12807800 | -2.22018300 |
| C  | -6.89263500 | -2.33579800 | -0.10161300 |
| H  | -6.83533800 | -1.81377100 | 1.99144800  |
| H  | -6.62793400 | -2.78538000 | -2.19618700 |
| H  | -7.93799700 | -2.63062700 | -0.08474300 |
| Na | 3.11828900  | 0.66841800  | -0.16075100 |
| C  | 1.03718400  | 2.65298300  | 2.05942700  |

|   |             |             |             |
|---|-------------|-------------|-------------|
| H | 0.24324100  | 3.18606600  | 2.58947600  |
| H | 1.86193400  | 2.43026400  | 2.73922400  |
| H | 0.65362500  | 1.73546600  | 1.60698300  |
| S | 1.71274900  | 3.73884000  | 0.75102300  |
| O | 2.77893500  | 2.91579800  | 0.01626300  |
| C | 0.23808600  | 3.75215000  | -0.32638400 |
| H | -0.03037400 | 2.72499500  | -0.58794700 |
| H | -0.58600900 | 4.24396100  | 0.19781000  |
| H | 0.50701500  | 4.32293700  | -1.21748900 |
| C | 2.74093500  | 0.75472900  | -3.59916200 |
| H | 2.32644200  | 0.57273700  | -4.59500800 |
| H | 3.27520800  | 1.70696300  | -3.58729200 |
| H | 1.96335400  | 0.72013000  | -2.82758800 |
| S | 3.97069700  | -0.54644000 | -3.22964900 |
| O | 4.47322000  | -0.26385700 | -1.79912300 |
| C | 2.78797600  | -1.93240500 | -3.08469200 |
| H | 2.06332500  | -1.66718900 | -2.30547800 |
| H | 2.30516900  | -2.08797000 | -4.05385200 |
| H | 3.36606200  | -2.81907900 | -2.81615300 |
| S | 5.04745000  | -1.12930300 | 2.15720800  |
| O | 3.98169600  | -0.07886000 | 1.82326100  |
| C | 4.98744000  | -2.37046700 | 0.81638400  |
| H | 5.22228200  | -1.84062100 | -0.11080500 |
| H | 5.73116000  | -3.14656800 | 1.01882100  |
| H | 3.98076800  | -2.79249400 | 0.75978500  |
| C | 4.31942800  | -2.16217600 | 3.47853400  |
| H | 4.97812400  | -3.01235600 | 3.67656900  |
| H | 4.24344000  | -1.53549300 | 4.36902300  |
| H | 3.32646400  | -2.49365600 | 3.16485800  |

**TS3g**

|   |            |             |             |
|---|------------|-------------|-------------|
| C | 3.89778300 | 3.09810500  | -0.46059800 |
| C | 3.37849100 | 1.80251900  | -0.47794200 |
| C | 3.09785800 | 1.12774200  | 0.71805000  |
| C | 3.34328100 | 1.78406400  | 1.92986000  |
| C | 3.85037200 | 3.08808100  | 1.95311900  |
| C | 4.13134800 | 3.75022200  | 0.75592700  |
| H | 4.13293600 | 3.59651300  | -1.39770400 |
| H | 3.20673200 | 1.29369900  | -1.42142700 |
| H | 3.14607300 | 1.26615600  | 2.86630500  |
| H | 4.03935900 | 3.57774200  | 2.90478600  |
| H | 4.54190000 | 4.75610900  | 0.76911800  |
| C | 2.46304100 | -0.26754900 | 0.72434800  |
| C | 0.96579600 | -0.10984000 | 0.60819100  |

|    |             |             |             |
|----|-------------|-------------|-------------|
| H  | 2.71401400  | -0.71746800 | 1.70511500  |
| H  | 0.50841700  | 0.68046100  | 1.19410700  |
| C  | 0.18640800  | -1.02712300 | -0.06129300 |
| O  | -1.13337000 | -1.01544100 | -0.06426500 |
| C  | 0.83282800  | -2.08760400 | -0.77818600 |
| C  | -0.04281800 | -3.14953900 | -1.39186500 |
| C  | -1.11065700 | -2.35141400 | -1.99210800 |
| H  | -0.40611700 | -3.91584000 | -0.69671100 |
| H  | 0.58562900  | -3.63568500 | -2.15226700 |
| H  | -0.85048600 | -1.65391700 | -2.78112000 |
| H  | -2.15936700 | -2.44585800 | -1.73966200 |
| C  | 2.24400900  | -2.08242700 | -1.04733300 |
| O  | 2.78978300  | -2.87681600 | -1.83347800 |
| N  | 3.02824100  | -1.12218600 | -0.34549200 |
| C  | 4.45037500  | -1.27376100 | -0.37852400 |
| C  | 5.12714500  | -1.32620600 | -1.60855900 |
| C  | 5.20186600  | -1.34776500 | 0.80370800  |
| C  | 6.51482200  | -1.45465700 | -1.64762300 |
| H  | 4.55605800  | -1.28268400 | -2.52691000 |
| C  | 6.59383100  | -1.46568300 | 0.75930500  |
| H  | 4.70609000  | -1.31816000 | 1.76767800  |
| C  | 7.25978500  | -1.52215500 | -0.46558400 |
| H  | 7.01707800  | -1.49811700 | -2.61035800 |
| H  | 7.15361900  | -1.51883200 | 1.68932200  |
| H  | 8.34147300  | -1.61575400 | -0.50058500 |
| Na | -2.90593800 | 0.31950000  | 0.01747000  |
| C  | -0.35069100 | 2.32324700  | -1.92846000 |
| H  | 0.40422400  | 2.92715500  | -2.43967600 |
| H  | -1.04300700 | 1.90054500  | -2.65947400 |
| H  | 0.11580800  | 1.53232900  | -1.33038300 |
| S  | -1.33401000 | 3.40949900  | -0.83594100 |
| O  | -2.24091500 | 2.48883000  | -0.00700900 |
| C  | 0.01766500  | 3.92567600  | 0.27872200  |
| H  | 0.53083700  | 3.04605300  | 0.67160900  |
| H  | 0.71534700  | 4.55894100  | -0.27526200 |
| H  | -0.44568000 | 4.49727300  | 1.08511800  |
| C  | -1.81304600 | -0.67510600 | 3.41725500  |
| H  | -1.31334600 | -1.28223800 | 4.17753300  |
| H  | -2.07451700 | 0.29968500  | 3.83372700  |
| H  | -1.18855900 | -0.56927800 | 2.52561100  |
| S  | -3.38230300 | -1.48908800 | 2.95786700  |
| O  | -4.01891600 | -0.61080500 | 1.86171300  |
| C  | -2.65558500 | -2.92756600 | 2.09758200  |
| H  | -2.02954800 | -2.55374000 | 1.27858100  |

|   |             |             |             |
|---|-------------|-------------|-------------|
| H | -2.07647500 | -3.51330800 | 2.81741600  |
| H | -3.48795600 | -3.52581800 | 1.72099000  |
| S | -6.15294100 | 0.45745700  | -1.03197500 |
| O | -4.70255600 | 0.12294200  | -1.40126100 |
| C | -6.74652400 | -0.92208400 | 0.00691000  |
| H | -6.11092600 | -0.91836200 | 0.89684400  |
| H | -7.79273800 | -0.74574700 | 0.27303800  |
| H | -6.63039700 | -1.86230200 | -0.53874400 |
| C | -7.13015000 | 0.08793200  | -2.53138600 |
| H | -8.19534400 | 0.18030200  | -2.30199100 |
| H | -6.84604500 | 0.82219700  | -3.28732800 |
| H | -6.88497200 | -0.91948000 | -2.87695000 |

### Int3h

|   |             |             |             |
|---|-------------|-------------|-------------|
| C | -2.36494800 | 4.02960900  | -0.65142100 |
| C | -2.30418900 | 2.73841700  | -1.18925800 |
| C | -1.95389400 | 1.64322700  | -0.39336000 |
| C | -1.67863500 | 1.86320500  | 0.96459900  |
| C | -1.74833800 | 3.14569700  | 1.50960800  |
| C | -2.08708000 | 4.23799800  | 0.70028800  |
| H | -2.63850300 | 4.86710900  | -1.28746000 |
| H | -2.53487500 | 2.58086200  | -2.24057900 |
| H | -1.41405700 | 1.01854800  | 1.59542100  |
| H | -1.54582800 | 3.29500000  | 2.56718600  |
| H | -2.14239100 | 5.23680400  | 1.12390800  |
| C | -1.80155000 | 0.25034800  | -1.02165700 |
| H | -2.27914800 | 0.31167900  | -2.01282000 |
| H | 2.96379900  | -1.27805600 | 2.30879000  |
| C | 0.24732300  | -1.28606300 | -0.83333800 |
| O | 1.47836000  | -1.59606900 | -1.05581900 |
| C | -2.03421000 | -1.96350600 | 0.21391500  |
| O | -2.74284300 | -2.76105100 | 0.83241700  |
| N | -2.54712100 | -0.76559000 | -0.24623300 |
| C | -3.96690300 | -0.55588800 | -0.11621400 |
| C | -4.54151600 | -0.32101100 | 1.13626900  |
| C | -4.77811800 | -0.58384900 | -1.25499800 |
| C | -5.91652000 | -0.10976900 | 1.24654100  |
| H | -3.91024200 | -0.31863800 | 2.01757200  |
| C | -6.15348200 | -0.36298600 | -1.14435100 |
| H | -4.33558000 | -0.79218100 | -2.22459200 |
| C | -6.72639000 | -0.12462300 | 0.10700100  |
| H | -6.35545300 | 0.06727800  | 2.22432000  |
| H | -6.77565100 | -0.38870100 | -2.03455900 |

|    |             |             |             |
|----|-------------|-------------|-------------|
| H  | -7.79604000 | 0.04291200  | 0.19487100  |
| Na | 3.23497700  | -0.42875500 | -0.59925400 |
| O  | 1.68764800  | 1.14423000  | 0.51987400  |
| O  | 3.36171700  | -0.52166000 | 1.86008300  |
| H  | 2.63267500  | 0.11873300  | 1.70999900  |
| H  | 1.45258500  | 2.06657900  | 0.68177900  |
| H  | 0.87917800  | 0.73839200  | 0.07965800  |
| C  | 8.00771600  | 0.55176000  | -0.95416100 |
| H  | 8.83734100  | 0.90471000  | -0.33552100 |
| H  | 7.96519900  | 1.12263200  | -1.88335200 |
| H  | 8.10123300  | -0.51483700 | -1.17268600 |
| S  | 6.43384500  | 0.84458000  | -0.07632200 |
| O  | 5.36039800  | 0.17439900  | -0.94534400 |
| C  | 6.71719000  | -0.27105500 | 1.34125800  |
| H  | 6.96975700  | -1.26833100 | 0.97166400  |
| H  | 7.52201500  | 0.13627400  | 1.95964300  |
| H  | 5.77865900  | -0.30051100 | 1.89992900  |
| C  | -0.34081500 | -0.08883900 | -1.19522400 |
| H  | 0.18959000  | 0.55099500  | -1.89828500 |
| C  | -0.59446400 | -2.27625800 | -0.07469800 |
| C  | -0.31046200 | -3.75884900 | -0.33922300 |
| C  | 0.09920000  | -3.16184000 | 0.96144900  |
| H  | 0.46417400  | -3.94713300 | -1.07475100 |
| H  | -1.17679800 | -4.41128900 | -0.34509100 |
| H  | -0.48616000 | -3.40973400 | 1.84065300  |
| H  | 1.15637900  | -2.96007800 | 1.10304500  |

### TS3h

|   |             |             |             |
|---|-------------|-------------|-------------|
| C | -4.39989000 | 3.33451300  | -0.06654500 |
| C | -3.69239500 | 2.40013200  | -0.82906100 |
| C | -2.76169600 | 1.54049700  | -0.23388000 |
| C | -2.55660600 | 1.63106800  | 1.14985800  |
| C | -3.26765600 | 2.55601400  | 1.91728200  |
| C | -4.18976400 | 3.41557400  | 1.31172800  |
| H | -5.11865900 | 3.99126400  | -0.54882700 |
| H | -3.86643800 | 2.33728600  | -1.90092500 |
| H | -1.85785200 | 0.95268200  | 1.62964400  |
| H | -3.10891800 | 2.59904600  | 2.99158300  |
| H | -4.74464500 | 4.13285700  | 1.90974600  |
| C | -1.93979800 | 0.60938400  | -1.12012500 |
| H | -2.52565400 | 0.43610200  | -2.04315700 |
| H | 1.19685000  | -2.04165400 | 0.74542100  |
| C | 0.40654400  | 0.51113500  | -1.99434600 |
| O | 1.52946500  | 0.98506900  | -2.46878000 |



|    |             |             |             |
|----|-------------|-------------|-------------|
| C  | 0.25125600  | -0.91469000 | -1.92252500 |
| C  | 2.47617200  | -1.17081700 | -2.31901400 |
| C  | 1.21571300  | -1.78186800 | -2.71037500 |
| H  | 2.78307600  | -1.27169000 | -1.28202400 |
| H  | 3.14955500  | -0.68585000 | -3.01468800 |
| H  | 1.03486700  | -1.78785300 | -3.78893500 |
| H  | 1.09957800  | -2.79278600 | -2.29972000 |
| C  | -0.60748300 | -1.50125700 | -0.93000100 |
| O  | -0.40780800 | -2.64424100 | -0.46014100 |
| N  | -1.68316700 | -0.70975000 | -0.47414200 |
| C  | -2.77356600 | -1.38969000 | 0.16174000  |
| C  | -2.56790300 | -2.08228200 | 1.36346500  |
| C  | -4.05791800 | -1.36619900 | -0.39899900 |
| C  | -3.62866200 | -2.73940700 | 1.98717200  |
| H  | -1.57550400 | -2.11032100 | 1.79589000  |
| C  | -5.11975200 | -2.01425800 | 0.23654300  |
| H  | -4.23345400 | -0.84347500 | -1.33279600 |
| C  | -4.91106100 | -2.70641400 | 1.43101800  |
| H  | -3.45112200 | -3.27605200 | 2.91509600  |
| H  | -6.10954600 | -1.98086700 | -0.21025800 |
| H  | -5.73619300 | -3.21339200 | 1.92289200  |
| Na | 2.84108000  | 1.51500500  | -0.76154900 |
| O  | 1.15389600  | 1.42326300  | 0.80906900  |
| O  | 1.87475800  | -1.47363900 | 1.15901200  |
| H  | 1.48589300  | -0.58180300 | 1.17677300  |
| H  | 0.83136400  | 1.96415700  | 1.54046700  |
| H  | 0.40070200  | 1.38579400  | 0.12600300  |
| C  | 7.13678000  | 0.48084900  | 1.30111400  |
| H  | 7.58831500  | -0.02848200 | 2.15669600  |
| H  | 7.40576300  | 1.53852900  | 1.31156700  |
| H  | 7.44716000  | 0.02222800  | 0.35908000  |
| S  | 5.31917300  | 0.38706800  | 1.43824000  |
| O  | 4.79795100  | 0.98522300  | 0.11702600  |
| C  | 5.13099700  | -1.41853000 | 1.29540300  |
| H  | 5.60969500  | -1.75662400 | 0.37252400  |
| H  | 5.59165300  | -1.88516300 | 2.17103500  |
| H  | 4.05519200  | -1.62287200 | 1.27894100  |
| C  | -0.62159700 | 1.28439000  | -1.44937900 |
| H  | -0.64454000 | 2.35479200  | -1.63376000 |

**Int4h**

|   |             |            |             |
|---|-------------|------------|-------------|
| C | 0.32273300  | 3.57622800 | -0.09281000 |
| C | -0.22399400 | 2.50719400 | -0.80599300 |
| C | -1.09388900 | 1.58916900 | -0.19248100 |

|    |             |             |             |
|----|-------------|-------------|-------------|
| C  | -1.41976300 | 1.78866000  | 1.15483300  |
| C  | -0.86551500 | 2.85385400  | 1.87855800  |
| C  | 0.01121400  | 3.74885400  | 1.26113400  |
| H  | 0.98563500  | 4.27736100  | -0.59300500 |
| H  | 0.02292000  | 2.38306700  | -1.85834500 |
| H  | -2.10983700 | 1.10840600  | 1.64078300  |
| H  | -1.13072600 | 2.98565100  | 2.92433000  |
| H  | 0.43530700  | 4.57749700  | 1.82090300  |
| C  | -1.65166400 | 0.41523800  | -1.03062500 |
| H  | -2.24285700 | 0.87114200  | -1.82820100 |
| H  | 3.51061300  | -1.67404600 | 3.37819000  |
| C  | -0.15373400 | -1.47252200 | -0.92152300 |
| O  | 0.92496500  | -2.28374600 | -1.25169300 |
| C  | -0.71137200 | -1.83722000 | 0.33112900  |
| C  | 0.80415200  | -3.50365800 | -0.44820000 |
| C  | -0.07688700 | -3.14930600 | 0.77084100  |
| H  | 1.81999000  | -3.81958500 | -0.19975700 |
| H  | 0.33608200  | -4.26270000 | -1.08469000 |
| H  | -0.83373900 | -3.91815600 | 0.95871900  |
| H  | 0.52774100  | -3.06795400 | 1.68523000  |
| C  | -2.09230500 | -1.48861100 | 0.57085900  |
| O  | -2.82929400 | -2.06655400 | 1.38340600  |
| N  | -2.58210100 | -0.42925800 | -0.24331500 |
| C  | -3.97831100 | -0.14230400 | -0.30057800 |
| C  | -4.75140000 | -0.00542900 | 0.86413700  |
| C  | -4.60852100 | 0.01102300  | -1.54733300 |
| C  | -6.11290700 | 0.29092200  | 0.77533900  |
| H  | -4.28860600 | -0.15855000 | 1.83015700  |
| C  | -5.96619400 | 0.32435100  | -1.62914600 |
| H  | -4.03724000 | -0.13831000 | -2.45879800 |
| C  | -6.72843000 | 0.46678400  | -0.46676500 |
| H  | -6.69400200 | 0.38853800  | 1.68843900  |
| H  | -6.43039900 | 0.43802500  | -2.60515200 |
| H  | -7.78671400 | 0.70340200  | -0.52848300 |
| Na | 2.01075000  | -0.07100500 | -0.70806700 |
| O  | 1.26445800  | -0.13720300 | 1.53058600  |
| O  | 3.62447200  | -1.18997000 | 2.55214700  |
| H  | 2.73781400  | -0.84470700 | 2.31348000  |
| H  | 0.90446600  | 0.69099800  | 1.88115700  |
| H  | 0.45013900  | -0.68489200 | 1.27347100  |
| C  | 6.67141200  | 1.00086500  | -1.55806700 |
| H  | 7.65943100  | 1.11584400  | -1.10411000 |
| H  | 6.39553000  | 1.91473400  | -2.08713300 |
| H  | 6.64654500  | 0.14816600  | -2.24092300 |

|   |             |             |             |
|---|-------------|-------------|-------------|
| S | 5.43153000  | 0.74928900  | -0.24194700 |
| O | 4.12249100  | 0.45035000  | -0.99357300 |
| C | 6.03167100  | -0.85109700 | 0.38796000  |
| H | 6.06507400  | -1.56921000 | -0.43559300 |
| H | 7.02406900  | -0.70469800 | 0.82447300  |
| H | 5.32106100  | -1.16490500 | 1.15847600  |
| C | -0.53974000 | -0.40367200 | -1.67353600 |
| H | -0.29238400 | -0.29683900 | -2.72387600 |

**Int5h**

|   |             |             |             |
|---|-------------|-------------|-------------|
| C | 4.45690900  | -3.83688200 | -0.20823700 |
| C | 3.37129900  | -2.96824500 | -0.11571500 |
| C | 3.20407900  | -1.93007500 | -1.04584800 |
| C | 4.15005100  | -1.79555000 | -2.06788200 |
| C | 5.23512800  | -2.67018400 | -2.16975500 |
| C | 5.39299100  | -3.69378800 | -1.23722800 |
| H | 4.57283200  | -4.63248000 | 0.52400100  |
| H | 2.64554100  | -3.08917000 | 0.68242300  |
| H | 4.03760000  | -0.99306800 | -2.79452900 |
| H | 5.95616400  | -2.54662800 | -2.97426700 |
| H | 6.23701000  | -4.37528100 | -1.30841400 |
| C | 2.00806800  | -0.96842600 | -0.99102100 |
| C | 0.66197900  | -1.66344800 | -1.12358000 |
| H | 2.13895300  | -0.28706300 | -1.83973500 |
| H | 0.43733400  | -2.16503100 | -2.05853100 |
| C | 0.07673200  | -2.02850900 | 0.05509500  |
| O | -1.02979700 | -2.85167100 | 0.14395800  |
| C | 0.44719000  | -1.53820800 | 1.33101700  |
| C | -1.23414000 | -3.15013200 | 1.55202000  |
| C | -0.55211800 | -2.02119700 | 2.34959500  |
| H | -0.76903100 | -4.12218700 | 1.75901800  |
| H | -2.31286000 | -3.23500500 | 1.71295300  |
| H | -1.27729400 | -1.24410200 | 2.64749700  |
| H | -0.10419600 | -2.40599700 | 3.27355800  |
| C | 1.35346300  | -0.48027600 | 1.44478100  |
| O | 1.54031300  | 0.22216700  | 2.47968200  |
| N | 2.02331700  | -0.08651600 | 0.23165900  |
| C | 3.14200200  | 0.80764200  | 0.32334000  |
| C | 4.12669500  | 0.67213200  | 1.31150200  |
| C | 3.27282000  | 1.83136700  | -0.62552800 |
| C | 5.20919000  | 1.54948700  | 1.34732800  |
| H | 4.02929300  | -0.10847100 | 2.05542500  |
| C | 4.36669800  | 2.69671600  | -0.59607400 |
| H | 2.50885800  | 1.95087800  | -1.39047100 |

|    |             |             |             |
|----|-------------|-------------|-------------|
| C  | 5.34009000  | 2.56179800  | 0.39430100  |
| H  | 5.96184600  | 1.43350700  | 2.12313300  |
| H  | 4.45031300  | 3.48217200  | -1.34330300 |
| H  | 6.19037200  | 3.23796600  | 0.42439900  |
| Na | -1.76183600 | 1.86060200  | 1.00804100  |
| C  | -2.08500400 | 6.31837400  | -0.97403800 |
| H  | -1.51990100 | 6.90492000  | -1.70448800 |
| H  | -2.17469400 | 6.87503300  | -0.03854300 |
| H  | -3.07909700 | 6.06775000  | -1.35482800 |
| S  | -1.18094600 | 4.77578700  | -0.59877900 |
| O  | -2.12001600 | 3.96523500  | 0.29791300  |
| C  | -1.27086100 | 4.02891700  | -2.26237200 |
| H  | -2.31546900 | 3.98085900  | -2.58481200 |
| H  | -0.67157500 | 4.62404700  | -2.95849300 |
| H  | -0.85854000 | 3.02106300  | -2.16010700 |
| C  | -4.45323000 | -2.70909300 | -0.79911300 |
| C  | -4.69534100 | -1.43386400 | -0.26239100 |
| C  | -6.01302400 | -0.98246300 | -0.07628400 |
| C  | -7.07806900 | -1.80306400 | -0.42774900 |
| C  | -6.83392600 | -3.07455700 | -0.96342500 |
| C  | -5.52574000 | -3.52810800 | -1.14830100 |
| H  | -3.42698100 | -3.04581900 | -0.92801100 |
| H  | -6.17457100 | 0.00671200  | 0.34121600  |
| H  | -8.09956800 | -1.46079000 | -0.28761300 |
| H  | -7.67009000 | -3.71306100 | -1.23620400 |
| H  | -5.34424400 | -4.51581000 | -1.56205700 |
| C  | -3.54509400 | -0.59408100 | 0.09654900  |
| O  | -3.62847300 | 0.52503500  | 0.59981900  |
| H  | -2.55765400 | -1.04144900 | -0.10970100 |
| O  | -0.37237500 | 1.19605000  | -0.73594700 |
| H  | 0.51852200  | 1.12712300  | -0.32251300 |
| H  | -0.44306700 | 0.26977600  | -1.07462000 |
| O  | -0.75624100 | 1.45508300  | 2.97237200  |
| H  | 0.14087000  | 1.00829500  | 2.87717200  |
| H  | -1.15485800 | 1.04481900  | 3.75255300  |

**TS4h**

|   |             |            |             |
|---|-------------|------------|-------------|
| C | -2.90857100 | 3.79598200 | 0.71367300  |
| C | -2.62207300 | 2.42747000 | 0.73328700  |
| C | -2.40653200 | 1.72251600 | -0.45891200 |
| C | -2.51053200 | 2.42184600 | -1.67094100 |
| C | -2.80377300 | 3.78751900 | -1.69649000 |
| C | -2.99962000 | 4.48364600 | -0.49977000 |
| H | -3.07469600 | 4.32179900 | 1.65026400  |

|    |             |             |             |
|----|-------------|-------------|-------------|
| H  | -2.57322900 | 1.90769400  | 1.68402300  |
| H  | -2.36527800 | 1.88795200  | -2.60752300 |
| H  | -2.89601000 | 4.30233500  | -2.64943900 |
| H  | -3.23947300 | 5.54332000  | -0.51332700 |
| C  | -2.03095900 | 0.23417600  | -0.49287800 |
| C  | -0.50700300 | 0.03728200  | -0.45542000 |
| H  | -2.37945300 | -0.14539000 | -1.45661800 |
| H  | 0.02315900  | 1.32848400  | -0.49197100 |
| C  | -0.05781800 | -0.20785000 | 0.88527600  |
| O  | 1.29153200  | -0.20064800 | 1.20066400  |
| C  | -0.84364800 | -0.42005700 | 1.97116700  |
| C  | 1.40583000  | -0.67776100 | 2.58471900  |
| C  | 0.00531600  | -0.52104200 | 3.21324700  |
| H  | 2.18969400  | -0.08647000 | 3.06204000  |
| H  | 1.71650300  | -1.72662000 | 2.53489700  |
| H  | -0.26178600 | -1.37997000 | 3.83562600  |
| H  | -0.06416500 | 0.37558700  | 3.84544900  |
| C  | -2.25910000 | -0.71320100 | 1.83895700  |
| O  | -2.95051100 | -1.13611800 | 2.77402200  |
| N  | -2.77287200 | -0.54320000 | 0.54366000  |
| C  | -4.13133000 | -0.88886100 | 0.25701900  |
| C  | -5.19145500 | -0.42218400 | 1.04660400  |
| C  | -4.41374000 | -1.69870700 | -0.85290600 |
| C  | -6.50701300 | -0.76035300 | 0.72477500  |
| H  | -4.97922600 | 0.18690800  | 1.91600900  |
| C  | -5.73205600 | -2.02207000 | -1.18004700 |
| H  | -3.59654300 | -2.08755600 | -1.45386400 |
| C  | -6.78609600 | -1.55526500 | -0.39055500 |
| H  | -7.31809300 | -0.39492100 | 1.34862400  |
| H  | -5.93150800 | -2.65107900 | -2.04327000 |
| H  | -7.81205800 | -1.81150200 | -0.63880500 |
| Na | 2.93114800  | 0.39365800  | -0.41653600 |
| C  | 6.66983000  | 1.78453700  | -0.39705800 |
| H  | 7.51513600  | 2.37887200  | -0.03831200 |
| H  | 5.80905400  | 2.42172800  | -0.61754100 |
| H  | 6.94580700  | 1.19601100  | -1.27611700 |
| S  | 6.12234300  | 0.66177400  | 0.93395000  |
| O  | 4.98257000  | -0.18098500 | 0.34711500  |
| C  | 7.57484000  | -0.44620400 | 0.94962200  |
| H  | 7.69793300  | -0.88494800 | -0.04365100 |
| H  | 8.46073100  | 0.12305400  | 1.24434300  |
| H  | 7.37220100  | -1.22940400 | 1.68223100  |
| C  | 0.13145800  | -3.04962600 | -0.72594800 |
| C  | 0.84076800  | -2.04632900 | -1.40574700 |

|   |             |             |             |
|---|-------------|-------------|-------------|
| C | 2.09968500  | -2.36177600 | -1.93665900 |
| C | 2.64449300  | -3.64080700 | -1.78056900 |
| C | 1.93286900  | -4.62905700 | -1.09658900 |
| C | 0.67150700  | -4.32836300 | -0.57208700 |
| H | -0.84526800 | -2.82492600 | -0.30592000 |
| H | 2.64038500  | -1.59968300 | -2.49042700 |
| H | 3.62234800  | -3.86468200 | -2.19893400 |
| H | 2.35336200  | -5.62339500 | -0.97484800 |
| H | 0.10819800  | -5.08845200 | -0.03743700 |
| C | 0.22427000  | -0.67449000 | -1.62252900 |
| O | 1.29253600  | 0.16856500  | -2.12178800 |
| H | -0.48441900 | -0.76277800 | -2.46370800 |
| O | 0.95698300  | 2.05948600  | -1.08759700 |
| H | 1.67222500  | 1.45580700  | -2.04655500 |
| H | 1.30305600  | 2.94225300  | -0.93740600 |
| O | 1.59442500  | 4.63591000  | -0.73858400 |
| H | 2.39499800  | 5.15775900  | -0.64718200 |
| H | 0.92882800  | 4.96049100  | -0.12766000 |

**Int6h**

|   |             |             |             |
|---|-------------|-------------|-------------|
| C | -2.32486200 | 3.45631300  | -0.91385900 |
| C | -2.21382500 | 2.17209000  | -0.37023000 |
| C | -1.81856200 | 1.08863400  | -1.16644200 |
| C | -1.56663900 | 1.32950200  | -2.52804700 |
| C | -1.68195400 | 2.60844500  | -3.07603900 |
| C | -2.05786000 | 3.68325800  | -2.26516400 |
| H | -2.64690900 | 4.27925600  | -0.27928700 |
| H | -2.46291100 | 2.00497200  | 0.67161500  |
| H | -1.31591300 | 0.49295700  | -3.18002100 |
| H | -1.50425000 | 2.76023600  | -4.13805600 |
| H | -2.16759300 | 4.67831400  | -2.68891500 |
| C | -1.65340300 | -0.34623800 | -0.61493100 |
| C | -0.19229700 | -0.73980600 | -0.41056700 |
| H | -2.06440200 | -1.00412000 | -1.38727000 |
| H | 0.91000400  | 0.42407900  | -2.38241300 |
| C | 0.25369000  | -0.48120000 | 0.86751100  |
| O | 1.59113600  | -0.61572000 | 1.25199400  |
| C | -0.53551400 | -0.07826200 | 1.94195600  |
| C | 1.61563000  | -0.62952500 | 2.71076100  |
| C | 0.31091400  | 0.04295500  | 3.18266400  |
| H | 2.53239700  | -0.11352900 | 3.01601500  |
| H | 1.67412300  | -1.67671400 | 3.02895700  |
| H | -0.12753700 | -0.48199600 | 4.03839900  |
| H | 0.49330500  | 1.08021600  | 3.51072800  |

|    |             |             |             |
|----|-------------|-------------|-------------|
| C  | -1.95662900 | -0.23783900 | 1.89880300  |
| O  | -2.70501600 | -0.15628000 | 2.88128000  |
| N  | -2.46623800 | -0.56200900 | 0.60385100  |
| C  | -3.83535700 | -0.92043400 | 0.43570600  |
| C  | -4.87439300 | -0.19058200 | 1.03500900  |
| C  | -4.16693500 | -2.02857400 | -0.36060300 |
| C  | -6.20281000 | -0.56171000 | 0.83026500  |
| H  | -4.63131600 | 0.64663300  | 1.67515300  |
| C  | -5.49782600 | -2.38253900 | -0.57689600 |
| H  | -3.37289400 | -2.62940200 | -0.79626100 |
| C  | -6.52598000 | -1.65072800 | 0.01882300  |
| H  | -6.99302200 | 0.01442000  | 1.30576700  |
| H  | -5.72815200 | -3.24395700 | -1.19921600 |
| H  | -7.56416200 | -1.92929300 | -0.14168200 |
| Na | 2.98257400  | 0.11824700  | -0.43898600 |
| C  | 0.97598100  | 3.31595700  | 1.50532300  |
| H  | 0.30707000  | 4.17919700  | 1.43889800  |
| H  | 1.38430700  | 3.24892000  | 2.51634200  |
| H  | 0.44250600  | 2.39279300  | 1.25112300  |
| S  | 2.37981200  | 3.59172500  | 0.37856500  |
| O  | 3.18456700  | 2.27288400  | 0.33418500  |
| C  | 1.45247800  | 3.64260700  | -1.18565900 |
| H  | 0.84378400  | 2.74026400  | -1.28270700 |
| H  | 0.81121500  | 4.52747800  | -1.19575400 |
| H  | 2.18889600  | 3.70412700  | -1.99044700 |
| C  | 1.10402500  | -3.44956600 | -0.21183700 |
| C  | 1.50875600  | -2.51469000 | -1.17503400 |
| C  | 2.71232800  | -2.73972500 | -1.86019800 |
| C  | 3.50495600  | -3.85432000 | -1.56509500 |
| C  | 3.09787400  | -4.76985300 | -0.59421700 |
| C  | 1.88850200  | -4.56553900 | 0.07569400  |
| H  | 0.16965400  | -3.28610700 | 0.31656400  |
| H  | 3.02561300  | -2.04497000 | -2.63215500 |
| H  | 4.43170400  | -4.01266900 | -2.11192900 |
| H  | 3.70898800  | -5.64028300 | -0.36978900 |
| H  | 1.55496900  | -5.27693900 | 0.82690100  |
| C  | 0.60540100  | -1.32707500 | -1.51281400 |
| O  | 1.50446300  | -0.31712400 | -2.17643700 |
| H  | -0.08278300 | -1.65633700 | -2.30557600 |
| O  | 5.11849600  | -0.63289400 | -0.33194200 |
| H  | 5.18712000  | -1.58126500 | -0.14401700 |
| H  | 5.37347000  | -0.15794800 | 0.49628300  |
| O  | 5.19892100  | 1.07729500  | 1.79497600  |
| H  | 4.73588300  | 0.76953800  | 2.58870600  |

|             |             |             |             |
|-------------|-------------|-------------|-------------|
| H           | 4.57052600  | 1.70324200  | 1.36714000  |
| <b>TS5h</b> |             |             |             |
| C           | -1.56127400 | 3.06389700  | 1.95289700  |
| C           | -1.77991500 | 1.78020900  | 1.45443000  |
| C           | -1.70486200 | 1.52254400  | 0.07599500  |
| C           | -1.42557400 | 2.59362300  | -0.78355200 |
| C           | -1.20781700 | 3.88235300  | -0.28789400 |
| C           | -1.27112400 | 4.12122200  | 1.08485600  |
| H           | -1.62483600 | 3.24179800  | 3.02356200  |
| H           | -2.00971700 | 0.96939100  | 2.13809400  |
| H           | -1.38486400 | 2.41799300  | -1.85687300 |
| H           | -1.00451000 | 4.69879300  | -0.97689100 |
| H           | -1.11186700 | 5.12290500  | 1.47592500  |
| C           | -1.87041200 | 0.10693700  | -0.50478000 |
| C           | -0.63598000 | -0.77328200 | -0.27205900 |
| H           | -1.97227200 | 0.23630100  | -1.58692700 |
| H           | 0.89483000  | 1.35676000  | -0.23095000 |
| C           | -0.73486500 | -1.53370900 | 0.91231000  |
| O           | 0.35470700  | -2.14911900 | 1.53499800  |
| C           | -1.89664900 | -1.77299000 | 1.59616300  |
| C           | -0.20776300 | -3.11094700 | 2.48848100  |
| C           | -1.62585900 | -2.61435300 | 2.81392700  |
| H           | 0.47568000  | -3.15347600 | 3.34052800  |
| H           | -0.22210200 | -4.08765100 | 1.99095300  |
| H           | -2.33276100 | -3.44286300 | 2.92572200  |
| H           | -1.65253000 | -2.03823100 | 3.75179100  |
| C           | -3.18567500 | -1.34523800 | 1.10727300  |
| O           | -4.25676900 | -1.68463700 | 1.61640000  |
| N           | -3.12910500 | -0.53529900 | -0.04546900 |
| C           | -4.34106600 | -0.09011100 | -0.65740400 |
| C           | -5.35537400 | 0.52607300  | 0.08783100  |
| C           | -4.51520400 | -0.25479800 | -2.03822800 |
| C           | -6.51735500 | 0.96796700  | -0.54333600 |
| H           | -5.23153000 | 0.63992800  | 1.15738900  |
| C           | -5.67232700 | 0.20350200  | -2.66763000 |
| H           | -3.74584900 | -0.76153300 | -2.61500800 |
| C           | -6.68037700 | 0.81627600  | -1.92186000 |
| H           | -7.29787500 | 1.44069700  | 0.04758400  |
| H           | -5.79072400 | 0.06681900  | -3.73970300 |
| H           | -7.58623700 | 1.16746300  | -2.40904300 |
| Na          | 3.09995500  | -0.09821800 | 0.78376400  |
| C           | 3.65569400  | 3.57306100  | 0.82919300  |
| H           | 3.56927200  | 4.60517600  | 0.47649100  |



|   |            |             |             |
|---|------------|-------------|-------------|
| H | 4.01369300 | 3.56258000  | 1.86130600  |
| H | 2.69642900 | 3.05329700  | 0.75201000  |
| S | 4.90074000 | 2.69805900  | -0.18109500 |
| O | 4.93561200 | 1.25450400  | 0.34767500  |
| C | 3.94440200 | 2.66679400  | -1.73656200 |
| H | 3.00452900 | 2.12295500  | -1.55714500 |
| H | 3.76920900 | 3.69732600  | -2.06196000 |
| H | 4.55903600 | 2.15129700  | -2.47936100 |
| C | 1.22259200 | -3.02925200 | -1.20129700 |
| C | 1.48396200 | -1.66890100 | -1.42966800 |
| C | 2.69020800 | -1.33359200 | -2.07150100 |
| C | 3.61852000 | -2.31458000 | -2.43075900 |
| C | 3.35814100 | -3.66123400 | -2.15907700 |
| C | 2.15158300 | -4.01079900 | -1.54907000 |
| H | 0.27361600 | -3.31924800 | -0.76662200 |
| H | 2.88961200 | -0.28995600 | -2.28827000 |
| H | 4.53292800 | -2.02852100 | -2.94691300 |
| H | 4.07407400 | -4.42843800 | -2.44186100 |
| H | 1.92331300 | -5.05578000 | -1.35625100 |
| C | 0.46494800 | -0.60338900 | -1.13634300 |
| O | 1.59180600 | 0.77864300  | -0.58187200 |
| H | 0.19730500 | -0.06594600 | -2.04609600 |
| O | 4.94896100 | -1.54700500 | 0.62154400  |
| H | 5.44666900 | -0.74319000 | 0.37901200  |
| H | 4.78517800 | -2.00840100 | -0.21949000 |
| O | 2.24661800 | -0.57631200 | 2.83939800  |
| H | 1.48322300 | -1.08240400 | 2.47495200  |
| H | 2.80053600 | -1.23958000 | 3.27929500  |
